# Supplementary material for: A Review of Studies Using Japanese Nationwide Administrative Claims Databases
Source: PubMed Central journal article supplement — Ann Clin Epidemiol. 2023 Jan 28;5(2):58–64. doi: 10.37737/ace.23008 (PMC10944998; doi:10.37737/ace.23008), 2023-01-28
Supplement: ace23008s1.pdf [file ace23008s1.pdf]

## **A Review of Studies Using Japanese Nationwide Administrative Claims Databases**

So Sato, Hideo Yasunaga

**Supplemental-Table 1-4.** Included Studies lists

**Appendix 1.** search terms

Supplemental Table 1. Included Studies in NDB

| No. | Title                                                                                                                                                                                                                             | Published year | First author      | Used database (mainly) | Research departments      |
|-----|-----------------------------------------------------------------------------------------------------------------------------------------------------------------------------------------------------------------------------------|----------------|-------------------|------------------------|---------------------------|
| 1   | Linkage Rate Between Data From Health Checks and Health Insurance Claims in the Japan National Database                                                                                                                           | 2013           | Etsuji Okamoto    | NDB                    | Other                     |
| 2   | The effectiveness of risk communication regarding drug safety information: a nationwide survey by the Japanese public health insurance claims data                                                                                | 2015           | Hiromi Hagiwara   | NDB                    | Internal medicine         |
| 3   | Regional variations in in-hospital mortality, care processes, and spending in acute ischemic stroke patients in Japan                                                                                                             | 2015           | Tetsuya Otsubo    | NDB                    | Neurosurgery              |
| 4   | Estimation of the number of children with cerebral palsy using nationwide health insurance claims data in Japan                                                                                                                   | 2016           | Satoshi Toyokawa  | NDB                    | Pediatrics                |
| 5   | Risk of recurrent overdose associated with prescribing patterns of psychotropic medications after nonfatal overdose                                                                                                               | 2017           | Yasuyuki Okumura  | NDB                    | Psychiatry                |
| 6   | Epidemiology of overdose episodes from the period prior to hospitalization for drug poisoning until discharge in Japan: An exploratory descriptive study using a nationwide claims database                                       | 2017           | Yasuyuki Okumura  | NDB                    | Psychiatry                |
| 7   | Effect on Helicobacter pylori eradication therapy against gastric cancer in Japan                                                                                                                                                 | 2017           | Momoko Tsuda      | NDB                    | Internal medicine         |
| 8   | The Survey of the Compliance Situation to the Antihypertensive Therapy Guideline by Analyzing Japanese National Claims Data                                                                                                       | 2017           | Hiromi Hagiwara   | NDB                    | Internal medicine         |
| 9   | Hepatitis B virus reactivation in patients with rheumatoid arthritis: Analysis of the National Database of Japan                                                                                                                  | 2018           | Misuzu Fujita     | NDB                    | Internal medicine         |
| 10  | Inpatient Expenditures Attributable to Hospital-Onset Clostridium difficile Infection: A Nationwide Case-Control Study in Japan                                                                                                   | 2018           | Haruhisa Fukuda   | NDB                    | Internal medicine         |
| 11  | Preoperative oral care and effect on postoperative complications after major cancer surgery                                                                                                                                       | 2018           | Miho Ishimaru     | NDB                    | Surgery                   |
| 12  | Association of high psychiatrist staffing with prolonged hospitalization, follow-up visits, and readmission in acute psychiatric units: a retrospective cohort study using a nationwide claims database                           | 2018           | Yasuyuki Okumura  | NDB                    | Psychiatry                |
| 13  | Glucose and Prolactin Monitoring in Children and Adolescents Initiating Antipsychotic Therapy                                                                                                                                     | 2018           | Yasuyuki Okumura  | NDB                    | Psychiatry                |
| 14  | Thyroid function tests before prescribing anti-dementia drugs: a retrospective observational study                                                                                                                                | 2018           | Nobuo Sakata      | NDB                    | Psychiatry                |
| 15  | Variation in fracture risk by season and weather: A comprehensive analysis across age and fracture site using a National Database of Health Insurance Claims in Japan                                                             | 2018           | Shuichiro Hayashi | NDB                    | Orthopedics               |
| 16  | Cesarean section rates and local resources for perinatal care in Japan: A nationwide ecological study using the national database of health insurance claims                                                                      | 2018           | Eri Maeda         | NDB                    | Obstetrics and gynecology |
| 17  | The first report of Japanese antimicrobial use measured by national database based on health insurance claims data (2011-2013): comparison with sales data, and trend analysis stratified by antimicrobial category and age group | 2018           | Daisuke Yamasaki  | NDB                    | Internal medicine         |
| 18  | Fragility Fractures in Older People in Japan Based on the National Health Insurance Claims Database                                                                                                                               | 2019           | Naomi Iihara      | NDB                    | Psychiatry                |

|    |                                                                                                                                                                                                                                                          |      |                      |     |                           |
|----|----------------------------------------------------------------------------------------------------------------------------------------------------------------------------------------------------------------------------------------------------------|------|----------------------|-----|---------------------------|
| 19 | Epidemiology of Adults and Children Treated for Nontuberculous Mycobacterial Pulmonary Disease in Japan                                                                                                                                                  | 2019 | Kiyohiko Izumi       | NDB | Internal medicine         |
| 20 | Comorbidity status in hospitalized elderly in Japan: Analysis from National Database of Health Insurance Claims and Specific Health Checkups                                                                                                             | 2019 | Shuko Nojiri         | NDB | General medicine          |
| 21 | Psychiatric Admissions and Length of Stay During Fiscal Years 2014 and 2015 in Japan: A Retrospective Cohort Study Using a Nationwide Claims Database                                                                                                    | 2019 | Yasuyuki Okumura     | NDB | Psychiatry                |
| 22 | Variation in process quality measures of diabetes care by region and institution in Japan during 2015-2016: An observational study of nationwide claims data                                                                                             | 2019 | Takehiro Sugiyama    | NDB | Internal medicine         |
| 23 | Indications and classes of outpatient antibiotic prescriptions in Japan: A descriptive study using the national database of electronic health insurance claims, 2012-2015                                                                                | 2019 | Hideki Hashimoto     | NDB | Internal medicine         |
| 24 | Healthcare Expenditures for the Treatment of Patients Infected with Hepatitis C Virus in Japan                                                                                                                                                           | 2019 | Haruhisa Fukuda      | NDB | Internal medicine         |
| 25 | Absolute risk of acute coronary syndrome after severe hypoglycemia: A population-based 2-year cohort study using the National Database in Japan                                                                                                          | 2019 | Yuichi Nishioka      | NDB | Internal medicine         |
| 26 | Central Nervous System Agent Classes and Fragility Fracture Risk among Elderly Japanese Individuals in a Nationwide Case-Crossover Design Study                                                                                                          | 2019 | Eri Ohara            | NDB | General medicine          |
| 27 | Nationwide survey of severe postpartum hemorrhage in Japan: an exploratory study using the national database of health insurance claims                                                                                                                  | 2019 | Mai Sato             | NDB | Obstetrics and gynecology |
| 28 | Estimates of hip fracture incidence in Japan using the National Health Insurance Claim Database in 2012-2015                                                                                                                                             | 2019 | Junko Tamaki         | NDB | Orthopedics               |
| 29 | Quality of Care in Chronic Kidney Disease and Incidence of End-stage Renal Disease in Older Patients: A Cohort Study                                                                                                                                     | 2020 | Shingo Fukuma        | NDB | Internal medicine         |
| 30 | Patient and National Economic Burden of Dengue in Japan: Results from Japanese National Claims Database                                                                                                                                                  | 2020 | Yusuke Kajimoto      | NDB | Internal medicine         |
| 31 | Clinical Management of Patients with Dengue Infection in Japan: Results from National Database of Health Insurance Claims                                                                                                                                | 2020 | Yusuke Kajimoto      | NDB | Internal medicine         |
| 32 | Prevalence, incidence, comorbidities, and treatment patterns among Japanese patients with acromegaly: a descriptive study using a nationwide claims database                                                                                             | 2020 | Keisuke Matsubayashi | NDB | Internal medicine         |
| 33 | Incidence and seasonality of type 1 diabetes: a population-based 3-year cohort study using the National Database in Japan                                                                                                                                | 2020 | Yuichi Nishioka      | NDB | Internal medicine         |
| 34 | Dipeptidyl Peptidase-4 Inhibitor Reduces the Risk of Developing Hypertrophic Scars and Keloids following Median Sternotomy in Diabetic Patients: A Nationwide Retrospective Cohort Study Using the National Database of Health Insurance Claims of Japan | 2020 | Hirotsugu Suwanai    | NDB | Dermatology               |
| 35 | Evaluation of tooth loss among patients with diabetes mellitus using the National Database of Health Insurance Claims and Specific Health Checkups of Japan                                                                                              | 2020 | Seitaro Suzuki       | NDB | Internal medicine         |
| 36 | Prevalence of patients with rheumatoid arthritis and age-stratified trends in clinical characteristics and treatment, based on the National Database of Health Insurance Claims and Specific Health Checkups of Japan                                    | 2020 | Ayako Nakajima       | NDB | Internal medicine         |
| 37 | A retrospective observational study of antimicrobial treatment for non-tuberculous mycobacteria disease using a nationwide claims database in Japan                                                                                                      | 2020 | Hidetoshi Igari      | NDB | Internal medicine         |

|    |                                                                                                                                                                                                                      |      |                  |     |                           |
|----|----------------------------------------------------------------------------------------------------------------------------------------------------------------------------------------------------------------------|------|------------------|-----|---------------------------|
| 38 | Nationwide incidence of central retinal artery occlusion in Japan: an exploratory descriptive study using the National Database of Health Insurance Claims (2011-2015)                                               | 2020 | Ai Kido          | NDB | Ophthalmology             |
| 39 | Prescription patterns of psychotropics in patients receiving synthetic glucocorticoids                                                                                                                               | 2020 | Taisuke Yatomi   | NDB | Surgery                   |
| 40 | Differences in healthcare expenditure estimates according to statistical approach: A nationwide claims database study on patients with hepatocellular carcinoma                                                      | 2020 | Haruhisa Fukuda  | NDB | Surgery                   |
| 41 | How was cognitive behavioural therapy for mood disorder implemented in Japan? A retrospective observational study using the nationwide claims database from FY2010 to FY2015                                         | 2020 | Yuta Hayashi     | NDB | Surgery                   |
| 42 | The first national survey of antimicrobial use among dentists in Japan from 2015 to 2017 based on the national database of health insurance claims and specific health checkups of Japan                             | 2020 | Akane Ono        | NDB | Other                     |
| 43 | Association between influenza and the incidence rate of new-onset type 1 diabetes in Japan                                                                                                                           | 2021 | Yuichi Nishioka  | NDB | Internal medicine         |
| 44 | Current Status and Effect of Outpatient Cardiac Rehabilitation After Percutaneous Coronary Intervention in Japan                                                                                                     | 2021 | Koshiro Kanaoka  | NDB | Rehabilitation            |
| 45 | A nationwide survey on participation in cardiac rehabilitation among patients with coronary heart disease using health claims data in Japan                                                                          | 2021 | Shosuke Ohtera   | NDB | Rehabilitation            |
| 46 | A Real-World Comparison of 1-Year Survival and Expenditures for Transcatheter Aortic Valve Replacements: SAPIEN 3 Versus CoreValve Versus Evolut R                                                                   | 2021 | Haruhisa Fukuda  | NDB | Internal medicine         |
| 47 | Effect of population inflow and outflow between rural and urban areas on regional antimicrobial use surveillance                                                                                                     | 2021 | Ryuji Koizumi    | NDB | Internal medicine         |
| 48 | Cesarean delivery rates for overall and multiple pregnancies in Japan: A descriptive study using nationwide health insurance claims data                                                                             | 2021 | Eri Maeda        | NDB | Obstetrics and gynecology |
| 49 | An alternative index for evaluating AMU and anti-methicillin-resistant Staphylococcus aureus agent use: A study based on the National Database of Health Insurance Claims and Specific Health Checkups data of Japan | 2021 | Yosuke Mita      | NDB | Internal medicine         |
| 50 | Fracture risk increased by concurrent use of central nervous system agents in older people: Nationwide case-crossover study                                                                                          | 2021 | Eri Ohara        | NDB | Psychiatry                |
| 51 | Association between number of teeth and Alzheimer's disease using the National Database of Health Insurance Claims and Specific Health Checkups of Japan                                                             | 2021 | Midori Tsuneishi | NDB | Psychiatry                |
| 52 | Characteristics and limitations of national antimicrobial surveillance according to sales and claims data                                                                                                            | 2021 | Yoshiki Kusama   | NDB | Internal medicine         |
| 53 | Maternal near-miss attributable to haemorrhagic stroke in patients with hypertensive disorders of pregnancy in Japan: A national cohort study                                                                        | 2021 | Akihiko Ueda     | NDB | Obstetrics and gynecology |
| 54 | Are Public Oral Care Services Evenly Distributed?-Nation-Wide Assessment of the Provision of Oral Care in Japan Using the National Database of Health Insurance Claims                                               | 2021 | Tomoko Kodama    | NDB | Other                     |
| 55 | Epidemiology of developmental dysplasia of the hip: analysis of Japanese national database                                                                                                                           | 2021 | Hiroki DEN       | NDB | Pediatrics                |
| 56 | Estimation of the number of patients with mitochondrial diseases: A descriptive study using a nationwide database in Japan                                                                                           | 2021 | Koki Ibayashi    | NDB | Internal medicine         |
| 57 | Incidence of central serous chorioretinopathy (2011-2018): a nationwide population-based cohort study of Japan                                                                                                       | 2021 | Ai Kido          | NDB | Ophthalmology             |

|    |                                                                                                                                                                                                                      |      |                       |     |                   |
|----|----------------------------------------------------------------------------------------------------------------------------------------------------------------------------------------------------------------------|------|-----------------------|-----|-------------------|
| 58 | Insufficient increase in bone mineral density testing rates and pharmacotherapy after hip and vertebral fracture: analysis of the National Database of Health Insurance Claims and Specific Health Checkups of Japan | 2021 | Shinichi Nakatoh      | NDB | Orthopedics       |
| 59 | Insufficient persistence to pharmacotherapy in Japanese patients with osteoporosis: an analysis of the National Database of Health Insurance Claims and Specific Health Checkups in Japan                            | 2021 | Shinichi Nakatoh      | NDB | Orthopedics       |
| 60 | Trend in Prescription and Treatment Retention of Molecular-Targeted Drugs in 121,131 Japanese Patients With Rheumatoid Arthritis: A Population-Based Real-World Study                                                | 2021 | Katsuhiko Takabayashi | NDB | Internal medicine |
| 61 | Differences in aggressive treatments during the actively dying phase in patients with cancer and heart disease: an exploratory study using the sampling dataset of the National Database of Health Insurance Claims  | 2021 | Atsushi Mizuno        | NDB | Internal medicine |
| 62 | Sodium-glucose cotransporter-2 inhibitors and the risk of urinary tract infection among diabetic patients in Japan: Target trial emulation using a nationwide administrative claims database                         | 2021 | Yoshinori Takeuchi    | NDB | Internal medicine |
| 63 | Incidence of fractures among patients receiving medications for type 2 diabetes or chronic obstructive pulmonary disease and glucocorticoid users according to the National Claims Database in Japan                 | 2021 | Saeko Fujiwara        | NDB | General medicine  |
| 64 | Geographic variations in rheumatoid arthritis treatment in Japan: A nationwide retrospective study using the national database of health insurance claims and specific health checkups of Japan                      | 2022 | Ayako Nakajima        | NDB | Internal medicine |
| 65 | Retrospective nationwide study on the trends in first-line antidiabetic medication for patients with type 2 diabetes in Japan                                                                                        | 2022 | Ryotaro Bouchi        | NDB | Internal medicine |
| 66 | Incidence of Sympathetic Ophthalmia after Inciting Events: A National Database Study in Japan                                                                                                                        | 2022 | Yohei Hashimoto       | NDB | Ophthalmology     |
| 67 | Guideline adherence by physicians for management of glucocorticoid-induced osteoporosis in Japan: a nationwide health insurance claims database study                                                                | 2022 | Masayuki Iki          | NDB | Internal medicine |
| 68 | Analysis of antiretroviral therapy switch rate and switching pattern for people living with HIV from a national database in Japan                                                                                    | 2022 | Toshio Naito          | NDB | Internal medicine |
| 69 | Relationship between diverting stoma and adjuvant chemotherapy in patients with rectal cancer: a nationwide study using the National Database of Health Insurance Claims and Specific Health Checkups of Japan       | 2022 | Nobuaki Hoshino       | NDB | Surgery           |
| 70 | Comorbidities and co-medications among 28 089 people living with HIV: A nationwide cohort study from 2009 to 2019 in Japan                                                                                           | 2022 | Toshio Naito          | NDB | Internal medicine |
| 71 | Tracing all patients who received insured dialysis treatment in Japan and the present situation of their number of deaths                                                                                            | 2022 | Shinichiro Kubo       | NDB | Internal medicine |
| 72 | Prevalence, Incidence Rate, and Risk Factors of Medication-Related Osteonecrosis of the Jaw in Patients With Osteoporosis and Cancer: A Nationwide Population-Based Study in Japan                                   | 2022 | Miho Ishimaru         | NDB | Internal medicine |
| 73 | The 2018 Japan Floods Increased Prescriptions of Antidementia Drugs Among Disaster Victims                                                                                                                           | 2022 | Saori Kashima         | NDB | General medicine  |
| 74 | Impact of the 2018 Japan Floods on prescriptions for migraine: A longitudinal analysis using the National Database of Health Insurance Claims                                                                        | 2022 | Yuji Okazaki          | NDB | Internal medicine |
| 75 | Impact of the 2018 Japan Floods on benzodiazepine use: a longitudinal analysis based on the National Database of Health Insurance Claims                                                                             | 2022 | Yuji Okazaki          | NDB | Psychiatry        |

|    |                                                                                                                                                                                                                              |      |                 |     |                           |
|----|------------------------------------------------------------------------------------------------------------------------------------------------------------------------------------------------------------------------------|------|-----------------|-----|---------------------------|
| 76 | Increased prescriptions for irritable bowel syndrome after the 2018 Japan Floods: a longitudinal analysis based on the Japanese National Database of Health Insurance Claims and Specific Health Checkups                    | 2022 | Yuji Okazaki    | NDB | Internal medicine         |
| 77 | Seasonal Exacerbation of Rheumatoid Arthritis Detected by Big Claims Data Analysis: A Retrospective Population Study                                                                                                         | 2022 | Fumihiko Ando   | NDB | Internal medicine         |
| 78 | Direct health care cost of treatment and medication of biliary atresia patients using the National Database of Health Insurance Claims and Specific Health Checkups                                                          | 2022 | Eri Hoshino     | NDB | Pediatrics                |
| 79 | Outpatient cardiac rehabilitation dose after acute coronary syndrome in a nationwide cohort                                                                                                                                  | 2022 | Koshiro Kanaoka | NDB | Rehabilitation            |
| 80 | How are new drugs disseminated in Japan? Analysis using the National Database of Health Insurance Claims of Japan                                                                                                            | 2022 | Tomone Watanabe | NDB | Internal medicine         |
| 81 | Evaluation of adrenaline auto-injector prescription profiles: A population-based, retrospective cohort study within the National Insurance Claims Database of Japan                                                          | 2022 | Sakura Sato     | NDB | Internal medicine         |
| 82 | Delayed initiation of anti-osteoporosis medications increases subsequent hip and vertebral fractures in patients on long-term glucocorticoid therapy: A nationwide health insurance claims database study in Japan           | 2022 | Masayuki Iki    | NDB | Orthopedics               |
| 83 | Medical expenditures for fragility hip fracture in Japan: a study using the nationwide health insurance claims database                                                                                                      | 2022 | Takahiro Mori   | NDB | Orthopedics               |
| 84 | The impact of hospital case volume on the outcomes after catheter ablation for atrial fibrillation according to the ablation technology                                                                                      | 2022 | Koshiro Kanaoka | NDB | Internal medicine         |
| 85 | Evaluation of the Correspondence between the Concentration of Antimicrobials Entering Sewage Treatment Plant Influent and the Predicted Concentration of Antimicrobials Using Annual Sales, Shipping, and Prescriptions Data | 2022 | Takashi Azuma   | NDB | Internal medicine         |
| 86 | Effectiveness and Safety of Reduced and Standard Daily Doses of Direct Oral Anticoagulants in Patients with Nonvalvular Atrial Fibrillation: A Cohort Study Using National Database Representing the Japanese Population     | 2022 | Kiyoshi Kubota  | NDB | Internal medicine         |
| 87 | Trends and Factors Associated With Cardiac Rehabilitation Participation - Data From Japanese Nationwide Databases                                                                                                            | 2022 | Koshiro Kanaoka | NDB | Rehabilitation            |
| 88 | Prevalence of hypertensive diseases and treated hypertensive patients in Japan: A nationwide administrative claims database study                                                                                            | 2022 | Waki Takashi    | NDB | Internal medicine         |
| 89 | Impact of efforts to prevent maternal deaths due to obstetric hemorrhage on trends in epidemiology and management of severe postpartum hemorrhage in Japan: a nationwide retrospective study                                 | 2022 | Akihiko Ueda    | NDB | Obstetrics and gynecology |
| 90 | Search for Indexes to Evaluate Trends in Antibiotic Use in the Sub-Prefectural Regions Using the National Database of Health Insurance Claims and Specific Health Checkups of Japan                                          | 2022 | Kanako Mizuno   | NDB | Internal medicine         |
| 91 | Drug prescribing changes in the last year of life among homebound older adults: national retrospective cohort study                                                                                                          | 2022 | Yukari Hattori  | NDB | Internal medicine         |
| 92 | A retrospective observational study of antibiotics treatment for sepsis using a nationwide claim database in Japan                                                                                                           | 2022 | Hidetoshi Igari | NDB | Internal medicine         |
| 93 | Prevalence of type 2 diabetes by age, sex and geographical area among two million public assistance recipients in Japan: a cross-sectional study using a nationally representative claims database                           | 2022 | Tami Sengoku    | NDB | Internal medicine         |

|    |                                                                                                                                 |      |                |     |                   |
|----|---------------------------------------------------------------------------------------------------------------------------------|------|----------------|-----|-------------------|
| 94 | Drug Combinations for Mood Disorders and Physical Comorbidities That Need Attention: A Cross-Sectional National Database Survey | 2022 | Shin Kuramochi | NDB | Psychiatry        |
| 95 | Nationwide comprehensive epidemiological study of rare diseases in Japan using a health insurance claims database               | 2022 | Kota Ninoiya   | NDB | Internal medicine |

NDB, National Database of Health Insurance Claims and Specific Health Checkups

Supplemental Table 2. Included Studies in NDB Open Data

| No. | Title                                                                                                                                                                                                                                      | Published year | First author      | Used database (mainly) | Research departments      |
|-----|--------------------------------------------------------------------------------------------------------------------------------------------------------------------------------------------------------------------------------------------|----------------|-------------------|------------------------|---------------------------|
| 1   | Patterns of CT use in Japan, 2014: A nationwide cross-sectional study                                                                                                                                                                      | 2017           | Toshihiro Koyama  | NDB Open Data          | Radiology                 |
| 2   | Wide difference in biologics usage and expenditure for the treatment of patients with rheumatoid arthritis in each prefecture in Japan analyzed using "National Database of Health Insurance Claims and Specific Health Checkups of Japan" | 2018           | Yasuyuki Kamata   | NDB Open Data          | Internal medicine         |
| 3   | Trends in isolated meniscus repair and meniscectomy in Japan, 2011-2016                                                                                                                                                                    | 2018           | Hisako Katano     | NDB Open Data          | Orthopedics               |
| 4   | Estimation of total prescription weights of active pharmaceutical ingredients in human medicines based on a public database for environmental risk assessment in Japan                                                                     | 2018           | Keiichiro Sato    | NDB Open Data          | Internal medicine         |
| 5   | Regional variance in patterns of prescriptions for chronic kidney disease in Japan                                                                                                                                                         | 2019           | Reiko Inoue       | NDB Open Data          | Internal medicine         |
| 6   | National burden of the pharmaceutical cost of wet compresses and its cost predictors: nationwide cross-sectional study in Japan                                                                                                            | 2019           | Hiroaki Itoh      | NDB Open Data          | Orthopedics               |
| 7   | Carbapenem-resistant <i>Pseudomonas aeruginosa</i> and carbapenem use in Japan: an ecological study                                                                                                                                        | 2019           | Fumitaka Terahara | NDB Open Data          | Internal medicine         |
| 8   | Trends Associated with Hemorrhoids in Japan: Data Mining of Medical Information Datasets and the National Database of Health Insurance Claims and Specific Health Checkups of Japan (NDB Open Data Japan)                                  | 2020           | Ririka Mukai      | NDB Open Data          | Surgery                   |
| 9   | Regional Variance of the Early Use of Tolvaptan for Autosomal Dominant Polycystic Kidney Disease                                                                                                                                           | 2020           | Reiko Inoue       | NDB Open Data          | Internal medicine         |
| 10  | Regional variance in the use of urine dipstick test for outpatients in Japan                                                                                                                                                               | 2020           | Hiroshi Nishi     | NDB Open Data          | Urology                   |
| 11  | Factors correlated with drug use for constipation: perspectives from the 2016 open Japanese National Database                                                                                                                              | 2020           | Hiroshi Mihara    | NDB Open Data          | Internal medicine         |
| 12  | The number of overall hysterectomies per population with the perimenopausal status is increasing in Japan: A national representative cohort study                                                                                          | 2020           | Masanori Isobe    | NDB Open Data          | Obstetrics and gynecology |
| 13  | Correlation between the number of laparoscopy-qualified gynecologists and the proportion of laparoscopic surgeries for benign gynecological diseases in Japan: An ecological study                                                         | 2021           | Masanori Isobe    | NDB Open Data          | Obstetrics and gynecology |
| 14  | Regional Distribution of Cardiologists and Prescription Patterns of Sodium-Glucose Transporter-2 Inhibitors in Japan                                                                                                                       | 2021           | Daisuke Inoue     | NDB Open Data          | Internal medicine         |
| 15  | Trends in arthroplasty in Japan by a complete survey, 2014-2017                                                                                                                                                                            | 2021           | Hisako Katano     | NDB Open Data          | Orthopedics               |
| 16  | Low-intensity pulsed ultrasound is frequently used to treat fractures after osteosynthesis in elderly patients: A study using open data from the national database of health insurance claims of Japan                                     | 2021           | Seiya Jingushi    | NDB Open Data          | Orthopedics               |
| 17  | Projected numbers of knee and hip arthroplasties up to the year 2030 in Japan                                                                                                                                                              | 2021           | Hiroaki Matsuoka  | NDB Open Data          | Orthopedics               |



|    |                                                                                                                                                                                                               |      |                    |               |                   |
|----|---------------------------------------------------------------------------------------------------------------------------------------------------------------------------------------------------------------|------|--------------------|---------------|-------------------|
| 18 | An Age-Period-Cohort Analysis of Prevalence and Consultation Rate for Dyslipidemia in Japan                                                                                                                   | 2021 | Tasuku Okui        | NDB Open Data | Internal medicine |
| 19 | Regional variation in the development of neonatal hyperbilirubinemia and relation with sunshine duration in Japan: an ecological study                                                                        | 2021 | Yasutaka kuniyoshi | NDB Open Data | Pediatrics        |
| 20 | Generic Drug Usage in Dentistry across Japan: Analysis Using a Japanese National Database                                                                                                                     | 2021 | Sachie Ono         | NDB Open Data | Internal medicine |
| 21 | A Validation Study of the National Database of Health Insurance Claims and Specific Health Checkups of Japan Regarding the Annual Number of Tooth Extractions Performed Across the Entire Japanese Population | 2021 | Seitaro Suzuki     | NDB Open Data | Other             |
| 22 | The Significant Association between Health Examination Results and Population Health: A Cross-Sectional Ecological Study Using a Nation-Wide Health Checkup Database in Japan                                 | 2021 | Yukinori Nagakura  | NDB Open Data | Internal medicine |
| 23 | Regional Inequality in Dental Care Utilization in Japan: An Ecological Study Using the National Database of Health Insurance Claims                                                                           | 2021 | Kento Taira        | NDB Open Data | Other             |
| 24 | The Use of Topical Antibiotics Based on the National Database of Health Insurance Claims and Specific Health Checkups of Japan (NDB) Open Data in 2017                                                        | 2022 | Tomoko Nakanishi   | NDB Open Data | Dermatology       |
| 25 | Effectiveness of polypharmacy reduction policy in Japan: nationwide retrospective observational study                                                                                                         | 2022 | Takehiro Ishida    | NDB Open Data | Internal medicine |
| 26 | Prevalence of idiopathic pulmonary fibrosis in Japan based on a claims database analysis                                                                                                                      | 2022 | Yasuhiro Kondoh    | NDB Open Data | Internal medicine |
| 27 | Analysis of regional differences in the amount of hypnotic and anxiolytic prescriptions in Japan using nationwide claims data                                                                                 | 2022 | Tasuku Okui        | NDB Open Data | Psychiatry        |
| 28 | Impact of reimbursement restriction on drug market sales under the National Health Insurance in Japan                                                                                                         | 2022 | Hiroaki Mamiya     | NDB Open Data | Other             |
| 29 | Association between the number of board-certified physiatrists and volume of rehabilitation provided in Japan: an ecological study                                                                            | 2022 | Yuki Kato          | NDB Open Data | Rehabilitation    |
| 30 | Nation-Wide Analysis of Glaucoma Medication Prescription in Fiscal Year of 2019 in Japan                                                                                                                      | 2022 | Masaki Tanito      | NDB Open Data | Ophthalmology     |
| 31 | Trends in outpatient rehabilitation practices in Japan: analysis using the National Database of Health Insurance Claims Open Data                                                                             | 2022 | Shinsuke Hori      | NDB Open Data | Rehabilitation    |

NDB, National Database of Health Insurance Claims and Specific Health Checkups

Supplemental Table 3. Included Studies in JMDC

| No. | Title                                                                                                                                                                                                   | Published year | First author      | Used database (mainly) | Research departments      |
|-----|---------------------------------------------------------------------------------------------------------------------------------------------------------------------------------------------------------|----------------|-------------------|------------------------|---------------------------|
| 1   | Antipsychotic monotherapy among outpatients with schizophrenia treated with olanzapine or risperidone in Japan: a health care database analysis                                                         | 2012           | Wenyu Ye          | JMDC                   | Psychiatry                |
| 2   | Analysis of 754 cases of antithyroid drug-induced agranulocytosis over 30 years in Japan                                                                                                                | 2013           | Hirotohi Nakamura | JMDC                   | Internal medicine         |
| 3   | Spread of viral infection to family members from influenza patients treated with a neuraminidase inhibitor                                                                                              | 2014           | Takashi Nakano    | JMDC                   | Internal medicine         |
| 4   | Predictors of hyperglycaemic individuals who do not follow up with physicians after screening in Japan: A cohort study                                                                                  | 2014           | Yuka Tsujimura    | JMDC                   | Internal medicine         |
| 5   | A review of accessibility of administrative healthcare databases in the Asia-Pacific region                                                                                                             | 2015           | Dominique Milea   | JMDC                   | Other                     |
| 6   | Association between statin use and cancer: data mining of a spontaneous reporting database and a claims database                                                                                        | 2015           | Mai Fujimoto      | JMDC                   | Internal medicine         |
| 7   | High-Risk Atherosclerotic Cardiovascular Disease in a Real-World Employed Japanese Population: Prevalence, Cardiovascular Event Rates, and Costs                                                        | 2015           | Keith L Davis     | JMDC                   | Internal medicine         |
| 8   | Realities in cost-effectiveness analyses: a study of castration-resistant prostate cancer patients using a medical claims database                                                                      | 2015           | Susumu Kunisawa   | JMDC                   | Urology                   |
| 9   | Treatment Patterns and Health Care Costs for Age-Related Macular Degeneration in Japan: An Analysis of National Insurance Claims Data                                                                   | 2016           | Atsuki Kume       | JMDC                   | Ophthalmology             |
| 10  | Treatment Patterns, Direct Cost of Biologics, and Direct Medical Costs for Rheumatoid Arthritis Patients: A Real-world Analysis of Nationwide Japanese Claims Data                                      | 2016           | Naonobu Sugiyama  | JMDC                   | Internal medicine         |
| 11  | High prevalence of cardiovascular comorbidities in patients with rheumatoid arthritis from a population-based cross-sectional study of a Japanese health insurance database                             | 2016           | Ryoko Sakai       | JMDC                   | Internal medicine         |
| 12  | Factors associated with hospitalization for seasonal influenza in a Japanese nonelderly cohort                                                                                                          | 2016           | Sachiko Ono       | JMDC                   | Internal medicine         |
| 13  | Adherence to dipeptidyl peptidase-4 inhibitor therapy among type 2 diabetes patients with employer-sponsored health insurance in Japan                                                                  | 2016           | Karen Kurtyaka    | JMDC                   | Internal medicine         |
| 14  | A Retrospective Claims Database Study on Drug Utilization in Japanese Patients with Crohn's Disease Treated with Adalimumab or Infliximab                                                               | 2016           | Kaoru Yokoyama    | JMDC                   | Internal medicine         |
| 15  | Prescription trends in children with pervasive developmental disorders: a claims data-based study in Japan                                                                                              | 2016           | Michihiro Satoh   | JMDC                   | Psychiatry                |
| 16  | Screening rate for hepatitis B virus infection in patients undergoing chemotherapy in Japan                                                                                                             | 2016           | Masafumi Ikeda    | JMDC                   | Internal medicine         |
| 17  | Evaluation of the treatment patterns and economic burden of dysmenorrhea in Japanese women, using a claims database                                                                                     | 2017           | Sayako Akiyama    | JMDC                   | Obstetrics and gynecology |
| 18  | Treatment patterns of postherpetic neuralgia patients before and after the launch of pregabalin and its effect on medical costs: Analysis of Japanese claims data provided by Japan Medical Data Center | 2017           | Mariko Honda      | JMDC                   | Dermatology               |

|    |                                                                                                                                                                                                                  |      |                       |      |                           |
|----|------------------------------------------------------------------------------------------------------------------------------------------------------------------------------------------------------------------|------|-----------------------|------|---------------------------|
| 19 | Impact of clinic follow-up visits on body weight control in people with prediabetes or diabetes mellitus: Japanese nonelderly cohort study                                                                       | 2017 | Sachiko Ono           | JMDC | Internal medicine         |
| 20 | Prevalence, treatments and medical cost of multiple sclerosis in Japan based on analysis of a health insurance claims database                                                                                   | 2017 | Mieko Ogino           | JMDC | Internal medicine         |
| 21 | Risk of pneumococcal diseases in adults with underlying medical conditions: a retrospective, cohort study using two Japanese healthcare databases                                                                | 2018 | Kentaro Imai          | JMDC | Internal medicine         |
| 22 | Treatment patterns, health care resource utilization, and costs in Japanese adults with attention-deficit hyperactivity disorder treated with atomoxetine                                                        | 2018 | Hideyuki Imagawa      | JMDC | Psychiatry                |
| 23 | Treatment Patterns, Statin Intolerance, and Subsequent Cardiovascular Events Among Japanese Patients With High Cardiovascular Risk Initiating Statin Therapy                                                     | 2018 | Saurabh P. Nagar      | JMDC | Internal medicine         |
| 24 | The incidence of medically-attended norovirus gastro-enteritis in Japan: Modelling using a medical care insurance claims database                                                                                | 2018 | Chia-Hsien Chang      | JMDC | Internal medicine         |
| 25 | Treatment patterns in hyperlipidaemia patients based on administrative claim databases in Japan                                                                                                                  | 2018 | Mayumi Wake           | JMDC | Internal medicine         |
| 26 | Resource Use and Cost of Treating Human Papillomavirus-Related Lesions in Japanese Women                                                                                                                         | 2018 | Akiko Mizukami        | JMDC | Obstetrics and gynecology |
| 27 | Decline of rotavirus-coded hospitalizations in children under 5 years: A report from Japan where rotavirus vaccines are self-financed                                                                            | 2018 | Masayuki Kobayashi    | JMDC | Pediatrics                |
| 28 | Impact of a direct-to-consumer information campaign on prescription patterns for overactive bladder                                                                                                              | 2018 | Masayoshi Zaitso      | JMDC | Urology                   |
| 29 | Effectiveness of influenza vaccination for children in Japan: Four-year observational study using a large-scale claims database                                                                                  | 2018 | Natsumi Shibata       | JMDC | Pediatrics                |
| 30 | Influence of pneumococcal conjugate vaccines on acute otitis media in Japan                                                                                                                                      | 2018 | Atsushi Sasaki        | JMDC | Otolaryngology            |
| 31 | Treatment patterns and healthcare resource utilization and costs in heavy menstrual bleeding: a Japanese claims database analysis                                                                                | 2018 | Sayako Akiyama        | JMDC | Obstetrics and gynecology |
| 32 | Lipid-lowering medication is associated with decreased risk of diabetic retinopathy and the need for treatment in patients with type 2 diabetes: A real-world observational analysis of a health claims database | 2018 | Ryo Kawasaki          | JMDC | Internal medicine         |
| 33 | Persistence rates and medical costs of biological therapies for psoriasis treatment in Japan: a real-world data study using a claims database                                                                    | 2018 | Rosarin Sruamsiri     | JMDC | Dermatology               |
| 34 | An integrative approach using real-world data to identify alternative therapeutic uses of existing drugs                                                                                                         | 2018 | Kouichi Hosomi        | JMDC | Internal medicine         |
| 35 | Associations between eating habits and glycemic control and obesity in Japanese workers with type 2 diabetes mellitus                                                                                            | 2018 | Maki Gouda            | JMDC | Internal medicine         |
| 36 | Recent patterns in antibiotic use for children with group A streptococcal infections in Japan                                                                                                                    | 2018 | Yusuke Okubo          | JMDC | Pediatrics                |
| 37 | Applying a common data model to Asian databases for multinational pharmacoepidemiologic studies: opportunities and challenges                                                                                    | 2018 | Edward Chia-Cheng Lai | JMDC | Other                     |
| 38 | Disease severity and economic burden in Japanese patients with systemic lupus erythematosus: A retrospective, observational study                                                                                | 2018 | Yoshiya Tanaka        | JMDC | Internal medicine         |

|    |                                                                                                                                                                                                                                           |      |                        |      |                   |
|----|-------------------------------------------------------------------------------------------------------------------------------------------------------------------------------------------------------------------------------------------|------|------------------------|------|-------------------|
| 39 | A case-control study of the risk of upper gastrointestinal mucosal injuries in patients prescribed concurrent NSAIDs and antithrombotic drugs based on data from the Japanese national claims database of 13 million accumulated patients | 2018 | Nobuyuki Sugisaki      | JMDC | Internal medicine |
| 40 | Patients with Asthma Prescribed Once-Daily Fluticasone Furoate/Vilanterol or Twice-Daily Fluticasone Propionate/Salmeterol as Maintenance Treatment: Analysis from a Claims Database                                                      | 2018 | Ryo Atsuta             | JMDC | Internal medicine |
| 41 | Penetration of new antidiabetic medications in East Asian countries and the United States: A cross-national comparative study                                                                                                             | 2018 | Kiyoshi Kubota         | JMDC | Internal medicine |
| 42 | Bleeding Risk of Warfarin and Direct Oral Anticoagulants in Younger Population: A Historical Cohort Study Using a Japanese Claims Database                                                                                                | 2018 | Satoshi Yokoyama       | JMDC | Internal medicine |
| 43 | Increasing trend of asymptomatic hyperuricemia under treatment with urate-lowering drugs in Japan                                                                                                                                         | 2019 | Masayuki Hakoda        | JMDC | Internal medicine |
| 44 | Burden of Herpes Zoster in the Japanese Population with Immunocompromised/Chronic Disease Conditions: Results from a Cohort Study Claims Database from 2005-2014                                                                          | 2019 | Shinichi Imafuku       | JMDC | Dermatology       |
| 45 | Comparison of persistence and adherence between fixed-dose combinations and two-pill combinations in Japanese patients with type 2 diabetes                                                                                               | 2019 | Reimi Nishimura        | JMDC | Internal medicine |
| 46 | Higher pulse pressure predicts initiation of dialysis in Japanese patients with diabetes                                                                                                                                                  | 2019 | Taeko Osawa            | JMDC | Internal medicine |
| 47 | Association between antidepressant use during pregnancy and autism spectrum disorder in children: a retrospective cohort study based on Japanese claims data                                                                              | 2019 | Madoka Yamamoto-Sasaki | JMDC | Psychiatry        |
| 48 | Adherence and persistence to hyperlipidemia medications in patients with atherosclerotic cardiovascular disease and those with diabetes mellitus based on administrative claims data in Japan                                             | 2019 | Mayumi Wake            | JMDC | Internal medicine |
| 49 | Use of corticosteroids for remission induction therapy in patients with new-onset ulcerative colitis in real-world settings                                                                                                               | 2019 | Motohiro Okayasu       | JMDC | Internal medicine |
| 50 | Changes in the quality of diabetes care in Japan between 2007 and 2015: A repeated cross-sectional study using claims data                                                                                                                | 2019 | Hirokazu Tanaka        | JMDC | Internal medicine |
| 51 | Treatment patterns, persistence and adherence rates in patients with type 2 diabetes mellitus in Japan: a claims-based cohort study                                                                                                       | 2019 | Reimi Nishimura        | JMDC | Internal medicine |
| 52 | Pulse Pressure is a Stronger Predictor Than Systolic Blood Pressure for Severe Eye Diseases in Diabetes Mellitus                                                                                                                          | 2019 | Masahiko Yamamoto      | JMDC | Internal medicine |
| 53 | Relationship Between Number of Multiple Risk Factors and Coronary Artery Disease Risk With and Without Diabetes Mellitus                                                                                                                  | 2019 | Mayuko Ymada-Harada    | JMDC | Internal medicine |
| 54 | A retrospective cohort study evaluating healthcare resource utilization in patients with asthma in Japan                                                                                                                                  | 2019 | Hiromasa Inoue         | JMDC | Internal medicine |
| 55 | Risk factors affecting the failed low-density lipoprotein level achievement rate in working-age male population at high cardiovascular risk                                                                                               | 2019 | Kenji Momo             | JMDC | Internal medicine |
| 56 | Assessment of "look-alike" packaging designs related to medication errors using information technology                                                                                                                                    | 2019 | Kenji Momo             | JMDC | Internal medicine |
| 57 | Treatment patterns and characteristics of patients with migraine in Japan: A retrospective analysis of health insurance claims data                                                                                                       | 2019 | Juliana L. Meyers      | JMDC | Internal medicine |

|    |                                                                                                                                                                                                                                             |      |                   |      |                           |
|----|---------------------------------------------------------------------------------------------------------------------------------------------------------------------------------------------------------------------------------------------|------|-------------------|------|---------------------------|
| 58 | Overt Proteinuria, Moderately Reduced eGFR and Their Combination Are Predictive of Severe Diabetic Retinopathy or Diabetic Macular Edema in Diabetes                                                                                        | 2019 | Masahiko Yamamoto | JMDC | Internal medicine         |
| 59 | Health-care resource use and current treatment of adult atopic dermatitis patients in Japan: A retrospective claims database analysis                                                                                                       | 2019 | Atsuyuki Igarashi | JMDC | Dermatology               |
| 60 | Influenza vaccination effectiveness for people aged under 65 years in Japan, 2013/2014 season: application of a doubly robust method to a large-scale, real-world dataset                                                                   | 2019 | Natsumi Shibata   | JMDC | Internal medicine         |
| 61 | Status of use of protease inhibitors for the prevention and treatment of pancreatitis after endoscopic retrograde cholangiopancreatography: An epidemiologic analysis of the evidence-practice gap using a health insurance claims database | 2019 | Takeshi Seta      | JMDC | Internal medicine         |
| 62 | Real-World Effectiveness of Sodium Glucose Co-Transporter-2 Inhibitors in Japanese Patients with Diabetes Mellitus                                                                                                                          | 2019 | Yuichiro Ito      | JMDC | Internal medicine         |
| 63 | The Prevalence, Characteristics, and Patient Burden of Severe Asthma Determined by Using a Japan Health Care Claims Database                                                                                                                | 2019 | Keiko Sato        | JMDC | Internal medicine         |
| 64 | Risk of coronary artery disease according to glucose abnormality status and prior coronary artery disease in Japanese men                                                                                                                   | 2019 | Masaru Kitazawa   | JMDC | Internal medicine         |
| 65 | International descriptive study for comparison of treatment patterns in patients with knee osteoarthritis between Korea and Japan using claims data                                                                                         | 2019 | Ryoko Sakai       | JMDC | Orthopedics               |
| 66 | Integrative analysis of clinical and bioinformatics databases to identify anticancer properties of digoxin                                                                                                                                  | 2019 | Satoshi Yokoyama  | JMDC | Internal medicine         |
| 67 | Search for Therapeutic Agents for Cardiac Arrest Using a Drug Discovery Tool and Large-Scale Medical Information Database                                                                                                                   | 2019 | Yoshito Zamami    | JMDC | Internal medicine         |
| 68 | Impact of Number of Drug Types on Clinical Outcome in Patients with Acute Hip Fracture                                                                                                                                                      | 2019 | Hiroki Maki       | JMDC | General medicine          |
| 69 | Indications and outcomes of paediatric tracheotomy: a descriptive study using a Japanese claims database                                                                                                                                    | 2019 | Kayoko Mizuno     | JMDC | Pediatrics                |
| 70 | Safety and effectiveness of Japanese herbal Kampo medicines for treatment of hyperemesis gravidarum                                                                                                                                         | 2019 | Nobuaki Michihata | JMDC | Obstetrics and gynecology |
| 71 | Prevalence of drug-drug interaction in atrial fibrillation patients based on a large claims data                                                                                                                                            | 2019 | Kenji Momo        | JMDC | Internal medicine         |
| 72 | Utility of a Specific Health Checkup Database Containing Lifestyle Behaviors and Lifestyle Diseases for Employee Health Insurance in Japan                                                                                                  | 2020 | Toshiki Fukasawa  | JMDC | Internal medicine         |
| 73 | Relationship Between Severe Respiratory Depression and Codeine-Containing Antitussives in Children: A Nested Case-Control Study                                                                                                             | 2020 | Sachiko Ono       | JMDC | Pediatrics                |
| 74 | Association Between Routine Nephropathy Monitoring and Subsequent Change in Estimated Glomerular Filtration Rate in Patients With Diabetes Mellitus: A Japanese Non-Elderly Cohort Study                                                    | 2020 | Sachiko Ono       | JMDC | Internal medicine         |
| 75 | Impact of immunomodulator use on treatment persistence in patients with ulcerative colitis: A claims database analysis                                                                                                                      | 2020 | Taku Kobayashi    | JMDC | Internal medicine         |
| 76 | Application of a Common Data Model (CDM) to rank the paediatric user and prescription prevalence of 15 different drug classes in South Korea, Hong Kong, Taiwan, Japan and Australia: an observational, descriptive study                   | 2020 | Ruth Brauer       | JMDC | Pediatrics                |
| 77 | Utilization and efficacy of palivizumab for children with Down syndrome                                                                                                                                                                     | 2020 | Takeshi Kinuma    | JMDC | Pediatrics                |

|    |                                                                                                                                                                          |      |                        |      |                   |
|----|--------------------------------------------------------------------------------------------------------------------------------------------------------------------------|------|------------------------|------|-------------------|
| 78 | Cost of inappropriate antimicrobial use for upper respiratory infection in Japan                                                                                         | 2020 | Shinya Tsuzuki         | JMDC | Internal medicine |
| 79 | Effectiveness of Early Versus Delayed Physical Rehabilitation on In-Hospital Mortality in Interstitial Pneumonia: A Retrospective Cohort Study                           | 2020 | Masashi Sawabe         | JMDC | Rehabilitation    |
| 80 | Treatment patterns and medical cost of systemic lupus erythematosus patients in Japan: a retrospective claims database study                                             | 2020 | Celine Miyazaki        | JMDC | Internal medicine |
| 81 | Diagnosis and medical care for congenital cytomegalovirus infection: An observational study using claims data in Japan, 2010 to 2017                                     | 2020 | Chiahsuan Lin          | JMDC | Pediatrics        |
| 82 | Association between oral anticoagulants and osteoporosis: Real-world data mining using a multi-methodological approach                                                   | 2020 | Satoshi Yokoyama       | JMDC | Internal medicine |
| 83 | Association Between Antipsychotics and Osteoporosis Based on Real-World Data                                                                                             | 2020 | Satoshi Yokoyama       | JMDC | Psychiatry        |
| 84 | Epinephrine autoinjector prescription patterns for severe anaphylactic patients in Japan: A retrospective analysis of health insurance claims data                       | 2020 | Mikio Nakajima         | JMDC | Internal medicine |
| 85 | Short-term effects of air pollution on daily single- and co-morbidity cardiorespiratory outpatient visits                                                                | 2020 | Xerxes Seposo          | JMDC | Internal medicine |
| 86 | Nonsteroidal anti-inflammatory drugs use in patients with chronic kidney disease are often prescribed from different clinicians than those who diagnosed them            | 2020 | Shungo Imai            | JMDC | Internal medicine |
| 87 | Treatment patterns and healthcare resource utilization in palmoplantar pustulosis patients in Japan: A claims database study                                             | 2020 | Celine Miyazaki        | JMDC | Internal medicine |
| 88 | The 12-year trend report of antipsychotic usage in a nationwide claims database derived from four million people in Japan                                                | 2020 | Takeo Hata             | JMDC | Psychiatry        |
| 89 | Treatment Persistence Between Long-Acting Injectable Versus Orally Administered Aripiprazole Among Patients with Schizophrenia in a Real-World Clinical Setting in Japan | 2020 | Nakao Iwata            | JMDC | Psychiatry        |
| 90 | Skipping breakfast, late-night eating and current smoking are associated with medication adherence in Japanese patients with diabetes                                    | 2020 | Yuta Yaguchi           | JMDC | Internal medicine |
| 91 | Longitudinal Assessment of Pain Management Among the Employed Japanese Population with Knee Osteoarthritis                                                               | 2020 | Kaname Ueda            | JMDC | Orthopedics       |
| 92 | Association between antidepressant use during pregnancy and congenital anomalies in children: A retrospective cohort study based on Japanese claims data                 | 2020 | Madoka Yamamoto-Sasaki | JMDC | Psychiatry        |
| 93 | Ophthalmic Corticosteroids in Pregnant Women with Allergic Conjunctivitis and Adverse Neonatal Outcomes: Propensity Score Analyses                                       | 2020 | Yohei Hashimoto        | JMDC | Ophthalmology     |
| 94 | Outpatient Prescriptions of Kampo Formulations in Japan                                                                                                                  | 2020 | Hayato Yamana          | JMDC | Internal medicine |
| 95 | Systemic and ocular diseases associated with the development of diabetic macular edema among Japanese patients with diabetes mellitus                                    | 2020 | Atsuki Kume            | JMDC | Ophthalmology     |
| 96 | Blood Pressure and Chronic Kidney Disease Stratified by Gender and the Use of Antihypertensive Drugs                                                                     | 2020 | Michihiro Satoh        | JMDC | Internal medicine |
| 97 | Dose Adjustment of Methotrexate Administered Concomitantly with Golimumab for Rheumatoid Arthritis in Japanese Real-World Clinical Settings                              | 2020 | Fumiko Yamairi         | JMDC | Internal medicine |

|     |                                                                                                                                                                                                                                          |      |                     |      |                           |
|-----|------------------------------------------------------------------------------------------------------------------------------------------------------------------------------------------------------------------------------------------|------|---------------------|------|---------------------------|
| 98  | Predictive factors associated with bleeding in atrial fibrillation patients treated with anti-coagulant drugs using a large claims database                                                                                              | 2020 | Kenji Momo          | JMDC | Internal medicine         |
| 99  | Incidence, prevalence and prescription patterns of antipsychotic medications use in Asia and US: A cross-nation comparison with common data model                                                                                        | 2020 | Chien-Chou Su       | JMDC | Psychiatry                |
| 100 | Association of Isolated Diastolic Hypertension Based on the Cutoff Value in the 2017 American College of Cardiology/American Heart Association Blood Pressure Guidelines With Subsequent Cardiovascular Events in the General Population | 2020 | Hidehiro Kaneko     | JMDC | Internal medicine         |
| 101 | Impact of Body Mass Index on Activities of Daily Living in Patients with Idiopathic Interstitial Pneumonias                                                                                                                              | 2020 | Kengo Shirado       | JMDC | Internal medicine         |
| 102 | Comorbidities associated with nontuberculous mycobacterial disease in Japanese adults: a claims-data analysis                                                                                                                            | 2020 | Shunsuke Uno        | JMDC | Internal medicine         |
| 103 | Treatment of Major Depressive Disorder in Japanese Patients with Cancer: A Matched Cohort Study Using Employer-Based Health Insurance Claims Data                                                                                        | 2020 | Tatsuo Akechi       | JMDC | Psychiatry                |
| 104 | Restfulness from sleep and subsequent cardiovascular disease in the general population                                                                                                                                                   | 2020 | Hidehiro Kaneko     | JMDC | Internal medicine         |
| 105 | Data resource profile: JMDC claims databases sourced from Medical Institutions                                                                                                                                                           | 2020 | Katsuhiko Nagai     | JMDC | Other                     |
| 106 | Pregabalin and injury: A nested case-control and case-crossover study                                                                                                                                                                    | 2020 | Yoshihisa Miyamoto  | JMDC | Orthopedics               |
| 107 | Influence of the Fukushima Daiichi Nuclear Power Plant Accident on the Use of Computed Tomography in Children With Mild Head Injuries                                                                                                    | 2020 | Shotaro Aso         | JMDC | Emergency medicine        |
| 108 | Impact of pre-existing hypertension and control status before atrial fibrillation onset on cardiovascular prognosis in patients with non-valvular atrial fibrillation: A real-world database analysis in Japan                           | 2020 | Kazuomi Kario       | JMDC | Internal medicine         |
| 109 | Effectiveness of Early Rehabilitation for Vertebral Compression Fractures: A Retrospective Cohort Study                                                                                                                                  | 2021 | Tomohiro Kobata     | JMDC | Rehabilitation            |
| 110 | Predictive Validity of Body Mass Index Cutoff Values Used in the Global Leadership Initiative on Malnutrition Criteria for Discriminating Severe and Moderate Malnutrition Based on In-Patients With Pneumonia in Asians                 | 2021 | Akio Shimizu        | JMDC | Internal medicine         |
| 111 | Mumps-Related Disease Burden in Japan: Analysis of JMDC Health Insurance Reimbursement Data for 2005-2017                                                                                                                                | 2021 | Satoko Ohfuji       | JMDC | Pediatrics                |
| 112 | Impact of Number of Drugs on Rehabilitation Outcomes in Patients after Traumatic Brain Injury: A Retrospective Cohort Study                                                                                                              | 2021 | Makiko Yamaoka      | JMDC | General medicine          |
| 113 | Trends in Corticosteroid Prescriptions for Ulcerative Colitis and Factors Associated with Long-Term Corticosteroid Use: Analysis Using Japanese Claims Data from 2006 to 2016                                                            | 2021 | Katsuyoshi Matsuoka | JMDC | Internal medicine         |
| 114 | Assessment of asthma severity according to treatment steps in Japanese pediatric patients: a descriptive cross-sectional study using an administrative claims database                                                                   | 2021 | Satomi Yoshida      | JMDC | Pediatrics                |
| 115 | Intraocular pressure-lowering medications during pregnancy and risk of neonatal adverse outcomes: a propensity score analysis using a large database                                                                                     | 2021 | Yohei Hashimoto     | JMDC | Ophthalmology             |
| 116 | Effect of Japanese herbal Kampo medicines on live birth rate in women with recurrent pregnancy loss                                                                                                                                      | 2021 | Daisuke Shigemi     | JMDC | Obstetrics and gynecology |

|     |                                                                                                                                                                                                                      |      |                    |      |                    |
|-----|----------------------------------------------------------------------------------------------------------------------------------------------------------------------------------------------------------------------|------|--------------------|------|--------------------|
| 117 | Prescription patterns of antiepileptic drugs for adult patients with newly diagnosed focal epilepsy from 2006 to 2017 in Japan                                                                                       | 2021 | Siming Chen        | JMDC | Internal medicine  |
| 118 | Comparison of adherence, persistence, and clinical outcome of generic and brand-name statin users: A retrospective cohort study using the Japanese claims database                                                   | 2021 | Jingwei Gao        | JMDC | Internal medicine  |
| 119 | Long-Term Pain Management and Health Care Resource Use Among an Employed Population in Japan with Knee Osteoarthritis Combined with Low Back Pain                                                                    | 2021 | Kaname Ueda        | JMDC | Orthopedics        |
| 120 | Treatment patterns for retinal diseases in patients newly-treated with anti-VEGF agents: A retrospective analysis of claims data from the Japan Medical Data Center database                                         | 2021 | Ryo Kawasaki       | JMDC | Ophthalmology      |
| 121 | Patterns of hypnotic prescribing for residual insomnia and recurrence of major depressive disorder: a retrospective cohort study using a Japanese health insurance claims database                                   | 2021 | Kentaro Yamato     | JMDC | Psychiatry         |
| 122 | Association between nutritional guidance or ophthalmological examination and discontinuation of physician visits in patients with newly diagnosed diabetes: A retrospective cohort study using a nationwide database | 2021 | Akira Okada        | JMDC | Internal medicine  |
| 123 | Eating and drinking habits and its association with obesity in Japanese healthy adults: retrospective longitudinal big data analysis using a health check-up database                                                | 2021 | Tomotsugu Seki     | JMDC | Internal medicine  |
| 124 | Real-World Prescription Pattern and Healthcare Cost Among Patients with Ulcerative Colitis in Japan: A Retrospective Claims Data Analysis                                                                            | 2021 | Celine Miyazaki    | JMDC | Internal medicine  |
| 125 | Decline incidence in upper gastrointestinal bleeding in several recent years: data of the Japan claims database of 13 million accumulated patients                                                                   | 2021 | Shun Fujimoto      | JMDC | Internal medicine  |
| 126 | Association of proton pump inhibitors and concomitant drugs with risk of acute kidney injury: a nested case-control study                                                                                            | 2021 | Keiko Ikuta        | JMDC | Internal medicine  |
| 127 | Standard table direct anterior approach within an early discharge protocol for cementless total hip arthroplasty: experience from a Japanese hospital                                                                | 2021 | Yoshiatsu Nakakita | JMDC | Orthopedics        |
| 128 | Increased risk of infective endocarditis after traumatic skin wound                                                                                                                                                  | 2021 | Hiroyuki Ohbe      | JMDC | Emergency medicine |
| 129 | Uncontrolled asthma: a retrospective cohort study in Japanese patients newly prescribed with medium-/high-dose ICS/LABA                                                                                              | 2021 | Hiromasa Inoue     | JMDC | Internal medicine  |
| 130 | Current status of oral anticoagulant adherence in Japanese patients with atrial fibrillation: A claims database analysis                                                                                             | 2021 | Naoharu Yagi       | JMDC | Internal medicine  |
| 131 | Changes in prescribing trends and initial pharmacotherapy of children with nocturnal enuresis in Japan: a large-scale medical claims database analysis                                                               | 2021 | Sachiko Kasamo     | JMDC | Pediatrics         |
| 132 | Real-World Treatment Patterns and Adherence to Oral Medication Among Patients with Bipolar Disorders: A Retrospective, Observational Study Using a Healthcare Claims Database                                        | 2021 | Takeshi Inoue      | JMDC | Psychiatry         |
| 133 | Rates and risk factors for amputation in people with diabetes in Japan: a historical cohort study using a nationwide claims database                                                                                 | 2021 | Masanori Kaneko    | JMDC | Internal medicine  |
| 134 | Medical Costs of and Changes in Glaucoma Treatment among Patients Newly Starting Glaucoma Care                                                                                                                       | 2021 | Yoshiko Fukuda     | JMDC | Ophthalmology      |
| 135 | Striatal TRPV1 activation by acetaminophen ameliorates dopamine D2 receptor antagonist-induced orofacial dyskinesia                                                                                                  | 2021 | Koki Nagaoka       | JMDC | Psychiatry         |
| 136 | Pneumococcal vaccine coverage in Japan among patients with a history of splenectomy: Results of a retrospective administrative database study                                                                        | 2021 | Miki Yamada        | JMDC | Internal medicine  |



|     |                                                                                                                                                                                                                                           |      |                   |      |                   |
|-----|-------------------------------------------------------------------------------------------------------------------------------------------------------------------------------------------------------------------------------------------|------|-------------------|------|-------------------|
| 137 | Association of Blood Pressure Classification Using the 2017 American College of Cardiology/American Heart Association Blood Pressure Guideline With Risk of Heart Failure and Atrial Fibrillation                                         | 2021 | Hidehiro Kaneko   | JMDC | Internal medicine |
| 138 | Association Between Blood Pressure Classification Using the 2017 ACC/AHA Blood Pressure Guideline and Retinal Atherosclerosis                                                                                                             | 2021 | Satoshi Matsuoka  | JMDC | Ophthalmology     |
| 139 | Relation of Serum Uric Acid and Cardiovascular Events in Young Adults Aged 20-49 Years                                                                                                                                                    | 2021 | Hikari Seki       | JMDC | Internal medicine |
| 140 | A Claims-Based Cohort Study on the Treatment Patterns of Japanese Patients with Type 2 Diabetes Mellitus and the Association of Early First Physician Visit with Time to Prescription of Oral Hypoglycemic Agents                         | 2021 | Hiroataka Watada  | JMDC | Internal medicine |
| 141 | Serum uric acid control for prevention of gout flare in patients with asymptomatic hyperuricaemia: a retrospective cohort study of health insurance claims and medical check-up data in Japan                                             | 2021 | Ruriko Koto       | JMDC | Internal medicine |
| 142 | Fasting Plasma Glucose and Incident Colorectal Cancer: Analysis of a Nationwide Epidemiological Database                                                                                                                                  | 2021 | Hidetaka Itoh     | JMDC | Internal medicine |
| 143 | Fasting Plasma Glucose and Colorectal Cancer Medications for attention-deficit/hyperactivity disorder in Japan: A retrospective cohort study of label compliance                                                                          | 2021 | Daniel Fife       | JMDC | Psychiatry        |
| 144 | Prevalence and incidence rates and treatment patterns of non-infectious uveitis in Japan: real-world data using a claims database                                                                                                         | 2021 | Akihiko Umazume   | JMDC | Ophthalmology     |
| 145 | Detailed association between serum uric acid levels and the incidence of chronic kidney disease stratified by sex in middle-aged adults                                                                                                   | 2021 | Shingo Nakayama   | JMDC | Internal medicine |
| 146 | Risk Factors and Lifestyles in the Development of Atrial Fibrillation Among Individuals Aged 20-39 Years                                                                                                                                  | 2021 | Hidetaka Itoh     | JMDC | Internal medicine |
| 147 | Association of Body Mass Index with Ischemic and Hemorrhagic Stroke                                                                                                                                                                       | 2021 | Masahiro Shiozawa | JMDC | Neurosurgery      |
| 148 | The background occurrence of selected clinical conditions prior to the start of an extensive national vaccination program in Japan                                                                                                        | 2021 | Tomotaka Sobue    | JMDC | Internal medicine |
| 149 | Eye drops for dry eye disease during pregnancy and adverse neonatal outcomes: high-dimensional propensity score analyses                                                                                                                  | 2021 | Yohei Hashimoto   | JMDC | Ophthalmology     |
| 150 | Comparison of the Safety and Effectiveness of Four Direct Oral Anticoagulants in Japanese Patients with Nonvalvular Atrial Fibrillation Using Real-World Data                                                                             | 2021 | Aya Enomoto       | JMDC | Internal medicine |
| 151 | Impact of prior cerebrovascular disease and glucose status on incident cerebrovascular disease in Japanese                                                                                                                                | 2021 | Momoko Oe         | JMDC | Neurosurgery      |
| 152 | Relation of the Metabolic Syndrome to Incident Colorectal Cancer in Young Adults Aged 20 to 49 Years                                                                                                                                      | 2021 | Takahiro Jimba    | JMDC | Internal medicine |
| 153 | Semiquantitative assessed proteinuria and risk of heart failure: Analysis of a nationwide epidemiological database                                                                                                                        | 2021 | Akira Fukui       | JMDC | Internal medicine |
| 154 | Current Status of Catheter Ablation for Atrial Fibrillation in Japan                                                                                                                                                                      | 2021 | Takuto Arita      | JMDC | Internal medicine |
| 155 | Trends in healthcare visits and antimicrobial prescriptions for acute infectious diarrhea in individuals aged 65 years or younger in Japan from 2013 to 2018 based on administrative claims database: a retrospective observational study | 2021 | Akane Ono         | JMDC | Internal medicine |
| 156 | Prescribing Trends of Biologic Disease-Modifying Anti-rheumatic Drugs Using a Claims Database from 6 Million People in Japan                                                                                                              | 2021 | Atsushi Hirata    | JMDC | Internal medicine |

|     |                                                                                                                                                                                                                                                           |      |                  |      |                           |
|-----|-----------------------------------------------------------------------------------------------------------------------------------------------------------------------------------------------------------------------------------------------------------|------|------------------|------|---------------------------|
| 157 | Repurposing haloperidol for the treatment of rheumatoid arthritis: an integrative approach using data mining techniques                                                                                                                                   | 2021 | Chihiro Nakagawa | JMDC | Internal medicine         |
| 158 | Risk of cardiovascular disease in patients with fatty liver disease as defined from the metabolic dysfunction associated fatty liver disease or nonalcoholic fatty liver disease point of view: a retrospective nationwide claims database study in Japan | 2021 | Masato Yoneda    | JMDC | Internal medicine         |
| 159 | Drug Repurposing Prediction and Validation From Clinical Big Data for the Effective Treatment of Interstitial Lung Disease                                                                                                                                | 2021 | Soni Wiswanto    | JMDC | Internal medicine         |
| 160 | Lifestyle behaviors associated with the initiation of renal replacement therapy in Japanese patients with chronic kidney disease: a retrospective cohort study using a claims database linked with specific health checkup results                        | 2021 | Azusa Hara       | JMDC | Internal medicine         |
| 161 | Development of algorithms for identifying patients with Crohn's disease in the Japanese health insurance claims database                                                                                                                                  | 2021 | Hiromu Morikubo  | JMDC | Other                     |
| 162 | Effects of piperacillin/tazobactam or cefepime on folinate dose in patients receiving high-dose methotrexate: A retrospective cohort study using Japanese administrative claims data                                                                      | 2021 | Shota Kadomura   | JMDC | Internal medicine         |
| 163 | Association between Maoto Use and Hospitalization for Seasonal Influenza in a Nonelderly Cohort in Japan                                                                                                                                                  | 2021 | Hayato Yamana    | JMDC | Internal medicine         |
| 164 | Untreated Hypertension and Subsequent Incidence of Colorectal Cancer: Analysis of a Nationwide Epidemiological Database                                                                                                                                   | 2021 | Hidehiro Kaneko  | JMDC | Internal medicine         |
| 165 | Prescription pattern analysis for antibiotics in working-age workers diagnosed with common cold                                                                                                                                                           | 2021 | Yasuhiro Araki   | JMDC | Internal medicine         |
| 166 | Prescription of Kampo Formulations for Pre-natal and Post-partum Women in Japan: Data From an Administrative Health Database                                                                                                                              | 2021 | Satoko Suzuki    | JMDC | Obstetrics and gynecology |
| 167 | Pneumococcal conjugate vaccines reduce myringotomy with tympanostomy tube insertion in young children in Japan                                                                                                                                            | 2021 | Yui Ogawa        | JMDC | Otolaryngology            |
| 168 | Spouse's Cardiovascular Disease As a Risk Factor for Cardiovascular Disease in Middle-Aged Adults: A Matched-Pair Cohort Study                                                                                                                            | 2021 | Hiroyuki Ohbe    | JMDC | Internal medicine         |
| 169 | Cardiovascular Health Metrics of 87,160 Couples: Analysis of a Nationwide Epidemiological Database                                                                                                                                                        | 2021 | Hidehiro Kaneko  | JMDC | Internal medicine         |
| 170 | Fasting plasma glucose and subsequent cardiovascular disease among young adults: Analysis of a nationwide epidemiological database                                                                                                                        | 2021 | Hidehiro Kaneko  | JMDC | Internal medicine         |
| 171 | Lipid Profile and Subsequent Cardiovascular Disease among Young Adults Aged < 50 Years                                                                                                                                                                    | 2021 | Hidehiro Kaneko  | JMDC | Internal medicine         |
| 172 | Possible association between eating behaviors and cardiovascular disease in the general population: Analysis of a nationwide epidemiological database                                                                                                     | 2021 | Hidehiro Kaneko  | JMDC | Internal medicine         |
| 173 | Risk of Cancer in Association with Ranitidine and Nizatidine vs Other H2 Blockers: Analysis of the Japan Medical Data Center Claims Database 2005-2018                                                                                                    | 2021 | Masao Iwagami    | JMDC | Internal medicine         |
| 174 | Metabolically Healthy Obesity and the Risk of Cardiovascular Disease in the General Population - Analysis of a Nationwide Epidemiological Database                                                                                                        | 2021 | Hidetaka Itoh    | JMDC | Internal medicine         |
| 175 | Appropriate definition of diabetes using an administrative database: A cross-sectional cohort validation study                                                                                                                                            | 2022 | Yuichi Nishioka  | JMDC | Other                     |

|     |                                                                                                                                                                                                                                                      |      |                          |      |                   |
|-----|------------------------------------------------------------------------------------------------------------------------------------------------------------------------------------------------------------------------------------------------------|------|--------------------------|------|-------------------|
| 176 | Association between topical $\beta$ -blocker use and asthma attacks in glaucoma patients with asthma: a cohort study using a claims database                                                                                                         | 2022 | Ai Kido                  | JMDC | Ophthalmology     |
| 177 | Association between adherence to warfarin and thrombotic events in patients with antiphospholipid syndrome in Japan: A claims-based retrospective cohort study                                                                                       | 2022 | Tserenlkham<br>Byambajav | JMDC | Internal medicine |
| 178 | Treatment strategy of oxaliplatin-induced peripheral neuropathy: a retrospective, nationwide study                                                                                                                                                   | 2022 | Satoshi<br>Yokoyama      | JMDC | Internal medicine |
| 179 | Estimating the causal effect of transient anemia status on renal and cardiovascular outcomes in community-dwelling patients in Japan at the beginning of impaired renal function using marginal structural modeling                                  | 2022 | Satoshi<br>Onozawa       | JMDC | Internal medicine |
| 180 | Disease burden and treatment sequence of polymyositis and dermatomyositis patients in Japan: a real-world evidence study                                                                                                                             | 2022 | Celine<br>Miyazaki       | JMDC | Internal medicine |
| 181 | Impact of Depression Onset and Treatment on the Trend of Annual Medical Costs in Japan: An Exploratory, Descriptive Analysis of Employer-Based Health Insurance Claims Data                                                                          | 2022 | Yoshinori Cho            | JMDC | Psychiatry        |
| 182 | Impact of Medication Adherence and Glycemic Control on the Risk of Micro- and Macrovascular Diseases in Patients with Diabetes                                                                                                                       | 2022 | Yuta Yaguchi             | JMDC | Internal medicine |
| 183 | Comparison of the incidence of bleeding between baloxavir marboxil and other anti-influenza drugs among outpatients with influenza virus infection: A retrospective cohort study using an employment-based health insurance claims database in Japan | 2022 | Azusa Hara               | JMDC | Internal medicine |
| 184 | Long-term safety of eldecalcitol in Japanese patients with osteoporosis: a retrospective, large-scale database study                                                                                                                                 | 2022 | Yasuhiro<br>Takeuchi     | JMDC | Internal medicine |
| 185 | Risk for Proteinuria in Newly Defined Hypertensive People Based on the 2017 American College of Cardiology/American Heart Association Blood Pressure Guideline                                                                                       | 2022 | Yuta Suzuki              | JMDC | Internal medicine |
| 186 | The utilization and demographic characteristics of in-hospital rehabilitation for acute vestibular neuritis in Japan                                                                                                                                 | 2022 | Tomohiko<br>Kamo         | JMDC | Otolaryngology    |
| 187 | Comparison of intra-familial transmission of influenza virus from index patients treated with baloxavir marboxil or oseltamivir using an influenza transmission model and a health insurance claims database                                         | 2022 | Shogo<br>Miyazawa        | JMDC | Internal medicine |
| 188 | Analysis of nationwide hemophilia care: A cohort study using two Japanese healthcare claims databases                                                                                                                                                | 2022 | Ei Kinai                 | JMDC | Internal medicine |
| 189 | Medical Costs Associated with Insomnia Treatment with Suvorexant Monotherapy in Japan: Results from a Retrospective Cohort Study Using a Large-Scale Claims Database                                                                                 | 2022 | Makoto<br>Uchiyama       | JMDC | Internal medicine |
| 190 | Real-World Insurance Claims Analysis of Venous Thromboembolism in Japanese Patients with Inflammatory Bowel Disease                                                                                                                                  | 2022 | Mikihiro<br>Fujiya       | JMDC | Internal medicine |
| 191 | Diseases prevalent before major depressive disorder diagnosis: an exploratory nested case-control study using health insurance-based claims data                                                                                                     | 2022 | Yoshinori Cho            | JMDC | Psychiatry        |
| 192 | Infliximab Treatment Persistence among Japanese Patients with Chronic Inflammatory Diseases: A Retrospective Japanese Claims Data Study                                                                                                              | 2022 | Sho Masui                | JMDC | Internal medicine |
| 193 | Incidence rates for hospitalized infections, herpes zoster, and malignancies in patients with ulcerative colitis in Japan: an administrative health claims database analysis                                                                         | 2022 | Katsuyoshi<br>Matsuoka   | JMDC | Internal medicine |

|     |                                                                                                                                                                                                                                         |      |                           |      |                           |
|-----|-----------------------------------------------------------------------------------------------------------------------------------------------------------------------------------------------------------------------------------------|------|---------------------------|------|---------------------------|
| 194 | Comparison of the effects on cardiovascular events between use of metformin and dipeptidyl peptidase-4 inhibitors as the first-line hypoglycaemic agents in Japanese patients with type 2 diabetes mellitus: a claims database analysis | 2022 | Rimei Nishimura           | JMDC | Internal medicine         |
| 195 | Association of retinal atherosclerosis assessed using Keith-Wagener-Barker system with incident heart failure and other atherosclerotic cardiovascular disease: Analysis of 319,501 individuals from the general population             | 2022 | Satoshi Matsuoka          | JMDC | Ophthalmology             |
| 196 | Incidence Rate and Prevalence of Systemic Sclerosis and Systemic Sclerosis-Associated Interstitial Lung Disease in Japan: Analysis Using Japanese Claims Databases                                                                      | 2022 | Masataka Kuwana           | JMDC | Internal medicine         |
| 197 | Association between Retinal Vein Occlusion and Life's Simple 7 Cardiovascular Health Metrics: A Large Claims Database Study                                                                                                             | 2022 | Yohei Hashimoto           | JMDC | Ophthalmology             |
| 198 | Association between proteinuria and incident colorectal cancer: analysis of a nationwide population-based database                                                                                                                      | 2022 | Satoshi Matsuoka          | JMDC | Internal medicine         |
| 199 | Prediabetes in Young Adults and Its Association With Cardiovascular Health Metrics in the Progression to Diabetes                                                                                                                       | 2022 | Yuta Suzuki               | JMDC | Internal medicine         |
| 200 | Safety of Japanese herbal Kampo medicines for the treatment of depression during pregnancy                                                                                                                                              | 2022 | Nobuaki Michihata         | JMDC | Obstetrics and gynecology |
| 201 | Predictive Modeling of Mental Illness Onset Using Wearable Devices and Medical Examination Data: Machine Learning Approach                                                                                                              | 2022 | Tomoki Saito              | JMDC | Psychiatry                |
| 202 | Medication Naïve Blood Pressure and Incident Cancers: Analysis of Two Nationwide Population-Based Databases                                                                                                                             | 2022 | Hidehiro Kaneko           | JMDC | Internal medicine         |
| 203 | Relationship of body mass index on activities of daily living in hospitalized patients with chronic obstructive pulmonary disease                                                                                                       | 2022 | Hitomi Tomohara-Ichishima | JMDC | Internal medicine         |
| 204 | Association between proteinuria and retinal vein occlusion in individuals with preserved renal function: a retrospective cohort study                                                                                                   | 2022 | Asahi Fujita              | JMDC | Ophthalmology             |
| 205 | Identification of individuals benefiting from the kakaritsuke-yakuzaishi (family pharmacist) system in Japan: a retrospective cohort study using an employment-based health insurance claims database                                   | 2022 | Ryo Iketani               | JMDC | Internal medicine         |
| 206 | Clinical Characteristics, Health Care Resource Utilization, and Prescription Patterns of Japanese Patients with Physician-Diagnosed Allergic Rhinitis: A Secondary Use of Database Study                                                | 2022 | Hajime Yoshisue           | JMDC | Internal medicine         |
| 207 | Association of Cardiovascular Health Metrics with Risk of Transition to Hypertension in Non-Hypertensive Young Adults                                                                                                                   | 2022 | Yuta Suzuki               | JMDC | Internal medicine         |
| 208 | A Retrospective, Longitudinal Study of Rheumatoid Arthritis Treatment Patterns with Janus Kinase Inhibitors and Other Disease-Modifying Antirheumatic Drugs in Japan                                                                    | 2022 | Yuko Kaneko               | JMDC | Internal medicine         |
| 209 | Use of systemic corticosteroids in patients newly registered at a claims database with a diagnosis of non-infectious uveitis: results from a real-world claims database analysis                                                        | 2022 | Akihiko Umazume           | JMDC | Ophthalmology             |
| 210 | Cost-Effectiveness of First-Line Nivolumab Plus Ipilimumab Combination Therapy in Advanced Non-Small-Cell Lung Cancer in Japan                                                                                                          | 2022 | Xiuting Mo                | JMDC | Internal medicine         |
| 211 | Influence of the COVID-19 pandemic on overall physician visits and telemedicine use among patients with type 1 or type 2 diabetes in Japan                                                                                              | 2022 | Susumu Yagome             | JMDC | Internal medicine         |

|     |                                                                                                                                                                                                           |      |                         |      |                   |
|-----|-----------------------------------------------------------------------------------------------------------------------------------------------------------------------------------------------------------|------|-------------------------|------|-------------------|
| 212 | Incidence of interventions for diabetic retinopathy and serious lower-limb complications and its related factors in patients with type 2 diabetes using a real-world large claims database                | 2022 | Ayako Yanagisawa-Sugita | JMDC | Internal medicine |
| 213 | Incidence, economic burden, and treatment of acute respiratory tract infection in hematopoietic stem cell transplantation recipients using real world data in Japan: A retrospective claims data analysis | 2022 | Kittima Wattanakamolkul | JMDC | Internal medicine |
| 214 | Impact of Medication Adherence on the Association Between Oral Anticoagulant Use and Risk of Dementia: A Retrospective Cohort Study using the Japanese Claims Database                                    | 2022 | Yuika Komatsu           | JMDC | Internal medicine |
| 215 | Demographic and clinical characteristics of patients with type 1 diabetes mellitus initiating sodium-glucose cotransporter 2 inhibitors in Japan: a real-world administrative database analysis           | 2022 | Norio Abiru             | JMDC | Internal medicine |
| 216 | Age-Specific Relation of Cardiovascular Health Metrics With Incident Cardiovascular Disease                                                                                                               | 2022 | Hidetaka Itoh           | JMDC | Internal medicine |
| 217 | Clinical utility of simple subjective gait speed for the risk stratification of heart failure in a primary prevention setting                                                                             | 2022 | Kensuke Ueno            | JMDC | Internal medicine |
| 218 | The reality of treatment for hyperuricemia and gout in Japan: A historical cohort study using health insurance claims data                                                                                | 2022 | Seigo Akari             | JMDC | Internal medicine |
| 219 | Ischemic Heart Disease and Chronic Obstructive Pulmonary Disease Hospitalizations in Japan Before and After the Introduction of a Heated Tobacco Product                                                  | 2022 | Angela van der Plas     | JMDC | Internal medicine |
| 220 | Reoperation Rates of Microendoscopic Discectomy Compared With Conventional Open Lumbar Discectomy: A Large-database Study                                                                                 | 2022 | Soichiro Masuda         | JMDC | Orthopedics       |
| 221 | Effect of SGLT2 inhibitor medication on new prescriptions of antihypertensives, antigout/antihyperuricemics, and antidyslipidemics in Japan: Analysis using the JMDC Claims Database                      | 2022 | Maki Gouda              | JMDC | Internal medicine |
| 222 | Current status and challenges of neurosurgical procedures for patients with myelomeningocele in real-world Japan                                                                                          | 2022 | Masahiro Nonaka         | JMDC | Pediatrics        |

JMDC, the JMDC Claims Database

Supplemental-Table 4. Included Studies in DPC

| No. | Title                                                                                                                                                                                                        | Published year | First author       | Used database (mainly) | Research departments |
|-----|--------------------------------------------------------------------------------------------------------------------------------------------------------------------------------------------------------------|----------------|--------------------|------------------------|----------------------|
| 1   | Difference in resource utilization between patients with acute and chronic heart failure from Japanese administrative database                                                                               | 2010           | Kazuaki Kuwabara   | DPC                    | Internal medicine    |
| 2   | Injury severity score, resource use, and outcome for trauma patients within a Japanese administrative database                                                                                               | 2010           | Kazuaki Kuwabara   | DPC                    | Emergency medicine   |
| 3   | Impact of drug-eluting stents on treatment option mix for coronary artery disease in Japan                                                                                                                   | 2010           | Hiromasa Horiguchi | DPC                    | Internal medicine    |
| 4   | Impact of hospital volume on postoperative complications and in-hospital mortality after renal surgery: data from the Japanese Diagnosis Procedure Combination Database                                      | 2010           | Hideo Yasunaga     | DPC                    | Urology              |
| 5   | Assessment of hospital performance with a case-mix standardized mortality model using an existing administrative database in Japan                                                                           | 2010           | Hiroaki Miyata     | DPC                    | Other                |
| 6   | Measles-related hospitalizations and complications in Japan, 2007-2008                                                                                                                                       | 2010           | Hideo Yasunaga     | DPC                    | Internal medicine    |
| 7   | Impact of hospital volume on clinical outcomes of endoscopic biliary drainage for acute cholangitis based on the Japanese administrative database associated with the diagnosis procedure combination system | 2010           | Atsuhiko Murata    | DPC                    | Internal medicine    |
| 8   | Delay in tetracycline treatment increases the risk of complications in Tsutsugamushi disease: data from the Japanese Diagnosis Procedure Combination database                                                | 2010           | Hideo Yasunaga     | DPC                    | Internal medicine    |
| 9   | Evaluation of compliance with the Tokyo Guidelines for the management of acute cholangitis based on the Japanese administrative database associated with the Diagnosis Procedure Combination system          | 2011           | Atsuhiko Murata    | DPC                    | Surgery              |
| 10  | Community-based appraisal of laparoscopic abdominal surgery in Japan                                                                                                                                         | 2011           | Kazuaki Kuwabara   | DPC                    | Surgery              |
| 11  | Quantitative assessment of the advantages of laparoscopic gastrectomy and the impact of volume-related hospital characteristics on resource use and outcomes of gastrectomy patients in Japan                | 2011           | Kazuaki Kuwabara   | DPC                    | Surgery              |
| 12  | Impact of remifentanyl introduction on practice patterns in general anesthesia                                                                                                                               | 2011           | Kanji Uchida       | DPC                    | Anesthesiology       |
| 13  | Community-based evaluation of laparoscopic versus open simple closure of perforated peptic ulcers                                                                                                            | 2011           | Kazuaki Kuwabara   | DPC                    | Surgery              |
| 14  | Effect of hospital volume on clinical outcome in patients with acute pancreatitis, based on a national administrative database                                                                               | 2011           | Atsuhiko Murata    | DPC                    | Surgery              |
| 15  | Prevalence of malignant hyperthermia and relationship with anesthetics in Japan: data from the diagnosis procedure combination database                                                                      | 2011           | Masahiko Sumitani  | DPC                    | Anesthesiology       |
| 16  | Reconsidering the value of rehabilitation for patients with cerebrovascular disease in Japanese acute health care hospitals                                                                                  | 2011           | Kazuaki Kuwabara   | DPC                    | Rehabilitation       |
| 17  | Incidence and clinical features of priapism in Japan: 46 cases from the Japanese diagnosis procedure combination database 2006-2008                                                                          | 2011           | T Sugihara         | DPC                    | Urology              |
| 18  | Impact of hospital volume on chest tube duration, length of stay, and mortality after lobectomy                                                                                                              | 2011           | Hiroshi Otake      | DPC                    | Surgery              |

|    |                                                                                                                                                                                                                                                    |      |                    |     |                    |
|----|----------------------------------------------------------------------------------------------------------------------------------------------------------------------------------------------------------------------------------------------------|------|--------------------|-----|--------------------|
| 19 | Risk factors for pulmonary embolism and the effects of fondaparinux after total hip and knee arthroplasty: a retrospective observational study with use of a national database in Japan                                                            | 2011 | Yuichi Nagase      | DPC | Orthopedics        |
| 20 | Effect of the Japanese herbal kampo medicine dai-kenchu-to on postoperative adhesive small bowel obstruction requiring long-tube decompression: a propensity score analysis                                                                        | 2011 | Hideo Yasunaga     | DPC | Surgery            |
| 21 | Profiling of the care processes for laryngeal cancer with the Japanese administrative database                                                                                                                                                     | 2011 | Yukako Ichimiya    | DPC | Otolaryngology     |
| 22 | An observational study using a national administrative database to determine the impact of hospital volume on compliance with clinical practice guidelines                                                                                         | 2011 | Atsuhiko Murata    | DPC | Surgery            |
| 23 | Community-Based Appraisal of the Effects of Parenteral Nutrition Versus Enteral Nutrition on the Quality of Care for Patients With Acute Pancreatitis                                                                                              | 2011 | Kazuaki Kuwabara   | DPC | Internal medicine  |
| 24 | A descriptive study evaluating the circumstances of medical treatment for acute pancreatitis before publication of the new JPN guidelines based on the Japanese administrative database associated with the Diagnosis Procedure Combination system | 2011 | Atsuhiko Murata    | DPC | Surgery            |
| 25 | Relationships of age, cholecystectomy approach and timing with the surgical and functional outcomes of elderly patients with cholecystitis                                                                                                         | 2011 | Kazuaki Kuwabara   | DPC | Surgery            |
| 26 | Reappraising the surgical approach on the perforated gastroduodenal ulcer: should gastric resection be abandoned?                                                                                                                                  | 2011 | Kazuaki Kuwabara   | DPC | Surgery            |
| 27 | Multivariate analysis of factors influencing medical costs of acute pancreatitis hospitalizations based on a national administrative database                                                                                                      | 2012 | Atsuhiko Murata    | DPC | Surgery            |
| 28 | Impact of remifentanyl use on early postoperative outcomes following brain tumor resection or rectal cancer surgery                                                                                                                                | 2012 | Kanji Uchida       | DPC | Anesthesiology     |
| 29 | Intussusception among Japanese children: an epidemiologic study using an administrative database                                                                                                                                                   | 2012 | Masato Takeuchi    | DPC | Pediatrics         |
| 30 | The incidence of pertussis hospitalizations among Japanese infants: excess hospitalizations and complications?                                                                                                                                     | 2012 | Masato Takeuchi    | DPC | Pediatrics         |
| 31 | Clinical features of infants hospitalized for 2009 pandemic influenza A (H1N1) in Japan: analysis using a national hospital discharge database                                                                                                     | 2012 | Masato Takeuchi    | DPC | Pediatrics         |
| 32 | Renal haemorrhage risk after extracorporeal shockwave lithotripsy: results from the Japanese Diagnosis Procedure Combination Database                                                                                                              | 2012 | Toru Sugihara      | DPC | Urology            |
| 33 | Impact of surgical intervention timing on the case fatality rate for Fournier's gangrene: an analysis of 379 cases                                                                                                                                 | 2012 | Toru Sugihara      | DPC | Urology            |
| 34 | Associations between the use of critical care procedures and change in functional status at discharge                                                                                                                                              | 2012 | Kazuaki Kuwabara   | DPC | Emergency medicine |
| 35 | The care processes for acute cholecystitis according to clinical practice guidelines based on the Japanese administrative database                                                                                                                 | 2012 | Atsuhiko Murata    | DPC | Surgery            |
| 36 | Characteristics, procedural differences, and costs of inpatients with drug poisoning in acute care hospitals in Japan                                                                                                                              | 2012 | Yasuyuki Okumura   | DPC | Psychiatry         |
| 37 | Management trends, angioembolization performance and multiorgan injury indicators of renal trauma from Japanese administrative claims database                                                                                                     | 2012 | Toru Sugihara      | DPC | Emergency medicine |
| 38 | Assessing the impact of diabetes-related comorbidities and care on the hospitalization costs for patients with diabetes mellitus in Japan                                                                                                          | 2012 | Dulamsuren Lkhagva | DPC | Internal medicine  |

|    |                                                                                                                                                                                     |      |                   |     |                    |
|----|-------------------------------------------------------------------------------------------------------------------------------------------------------------------------------------|------|-------------------|-----|--------------------|
| 39 | Admissions related to interstitial cystitis in Japan: an estimation based on the Japanese diagnosis procedure combination database                                                  | 2012 | Toru Sugihara     | DPC | Urology            |
| 40 | Risk factors affecting inhospital mortality after hip fracture: retrospective analysis using the Japanese Diagnosis Procedure Combination Database                                  | 2012 | Naoko Shouda      | DPC | Orthopedics        |
| 41 | Mortality and morbidity of hepatectomy, radiofrequency ablation, and embolization for hepatocellular carcinoma: a national survey of 54,145 patients                                | 2012 | Masaya Sato       | DPC | Surgery            |
| 42 | Factors affecting the occurrence of pulmonary embolism after spinal surgery: data from the national administrative database in Japan                                                | 2012 | Kazuhiro Masuda   | DPC | Orthopedics        |
| 43 | Mortality and morbidity in dialysis-dependent patients undergoing spinal surgery: analysis of a national administrative database in Japan                                           | 2012 | Hiroataka Chikuda | DPC | Orthopedics        |
| 44 | The burden of Clostridium difficile-associated disease following digestive tract surgery in Japan                                                                                   | 2012 | Hideo Yasunaga    | DPC | Surgery            |
| 45 | Variation in cancer surgical outcomes associated with physician and nurse staffing: a retrospective observational study using the Japanese Diagnosis Procedure Combination Database | 2012 | Hideo Yasunaga    | DPC | Surgery            |
| 46 | The influence of diabetes mellitus on short-term outcomes of patients with bleeding peptic ulcers                                                                                   | 2012 | Atsuhiko Murata   | DPC | Internal medicine  |
| 47 | Relationship between hospital volume and operative mortality for liver resection: Data from the Japanese Diagnosis Procedure Combination database                                   | 2012 | Hideo Yasunaga    | DPC | Surgery            |
| 48 | Comparison of emergency hospital admissions for drug poisoning and major diseases: a retrospective observational study using a nationwide administrative discharge database         | 2012 | Yasuyuki Okumura  | DPC | Emergency medicine |
| 49 | Association of early post-procedure hemodynamic management with the outcomes of subarachnoid hemorrhage patients                                                                    | 2012 | Kazuaki Kuwabara  | DPC | Neurosurgery       |
| 50 | Association between hospital volume and outcomes of elderly and non-elderly patients with acute biliary diseases: a national administrative database analysis                       | 2013 | Atsuhiko Murata   | DPC | Surgery            |
| 51 | A community-based comparison of trauma patient outcomes between D- and L-lactate fluids                                                                                             | 2013 | Kazuaki Kuwabara  | DPC | Emergency medicine |
| 52 | The burden of epiglottitis among Japanese children before the Haemophilus influenzae type b vaccination era: an analysis using a nationwide administrative database                 | 2013 | Masato Takeuchi   | DPC | Pediatrics         |
| 53 | Pyloromyotomy versus i.v. atropine therapy for the treatment of infantile pyloric stenosis: nationwide hospital discharge database analysis                                         | 2013 | Masato Takeuchi   | DPC | Pediatrics         |
| 54 | Longer operative time is associated with higher risk of severe complications after percutaneous nephrolithotomy: analysis of 1511 cases from a Japanese nationwide database         | 2013 | Toru Sugihara     | DPC | Urology            |
| 55 | Wide range and variation in minimally invasive surgery for renal malignancy in Japan: a population-based analysis                                                                   | 2013 | Toru Sugihara     | DPC | Urology            |
| 56 | Does mechanical bowel preparation improve quality of laparoscopic nephrectomy? Propensity score-matched analysis in Japanese series                                                 | 2013 | Toru Sugihara     | DPC | Urology            |
| 57 | Regional, institutional and individual factors affecting selection of minimally invasive nephroureterectomy in Japan: a national database analysis                                  | 2013 | Toru Sugihara     | DPC | Urology            |
| 58 | Is mechanical bowel preparation in laparoscopic radical prostatectomy beneficial? An analysis of a Japanese national database                                                       | 2013 | Toru Sugihara     | DPC | Urology            |



|    |                                                                                                                                                                                                                                                |      |                    |     |                    |
|----|------------------------------------------------------------------------------------------------------------------------------------------------------------------------------------------------------------------------------------------------|------|--------------------|-----|--------------------|
| 59 | Association between ambulance distance to hospitals and mortality from acute diseases in Japan: national database analysis                                                                                                                     | 2013 | Atsuhiko Murata    | DPC | Emergency medicine |
| 60 | A nomogram predicting severe adverse events after ureteroscopic lithotripsy: 12 372 patients in a Japanese national series                                                                                                                     | 2013 | Toru Sugihara      | DPC | Urology            |
| 61 | Impact of hospital volume on postoperative complications and in-hospital mortality after musculoskeletal tumor surgery: analysis of a national administrative database                                                                         | 2013 | Koichi Ogura       | DPC | Orthopedics        |
| 62 | Incidence and risk factors for pulmonary embolism after primary musculoskeletal tumor surgery                                                                                                                                                  | 2013 | Koichi Ogura       | DPC | Orthopedics        |
| 63 | Length of mechanical restraint following haloperidol injections versus oral atypical antipsychotics for the initial treatment of acute schizophrenia: a propensity-matched analysis from the Japanese diagnosis procedure combination database | 2013 | Mitsuhiro Nakamura | DPC | Psychiatry         |
| 64 | Japanese severity score for acute pancreatitis well predicts in-hospital mortality: a nationwide survey of 17,901 cases                                                                                                                        | 2013 | Tsuyoshi Hamada    | DPC | Surgery            |
| 65 | Continuous regional arterial infusion for acute pancreatitis: a propensity score analysis using a nationwide administrative database                                                                                                           | 2013 | Tsuyoshi Hamada    | DPC | Surgery            |
| 66 | Rarity of severe bleeding and perforation in endoscopic ultrasound-guided fine needle aspiration for submucosal tumors                                                                                                                         | 2013 | Tsuyoshi Hamada    | DPC | Internal medicine  |
| 67 | Health care costs related to out-of-hospital cardiopulmonary arrest in Japan                                                                                                                                                                   | 2013 | Tatsuma Fukuda     | DPC | Emergency medicine |
| 68 | Impact of age and comorbidity burden on mortality and major complications in older adults undergoing orthopaedic surgery: an analysis using the Japanese diagnosis procedure combination database                                              | 2013 | Hiroataka Chikuda  | DPC | Orthopedics        |
| 69 | Incidence and risk factors for mortality of vertebral osteomyelitis: a retrospective analysis using the Japanese diagnosis procedure combination database                                                                                      | 2013 | Toru Akiyama       | DPC | Orthopedics        |
| 70 | Effect and cost of treatment for acute pancreatitis with or without gabexate mesylate: a propensity score analysis using a nationwide administrative database                                                                                  | 2013 | Hideo Yasunaga     | DPC | Surgery            |
| 71 | Body mass index and outcomes following gastrointestinal cancer surgery in Japan                                                                                                                                                                | 2013 | Hideo Yasunaga     | DPC | Surgery            |
| 72 | Outcomes after laparoscopic or open distal gastrectomy for early-stage gastric cancer: a propensity-matched analysis                                                                                                                           | 2013 | Hideo Yasunaga     | DPC | Surgery            |
| 73 | Stroke care units versus general medical wards for acute management of stroke in Japan                                                                                                                                                         | 2013 | Takahiro Inoue     | DPC | Neurosurgery       |
| 74 | Endoscopic submucosal dissection for gastric cancer: the influence of hospital volume on complications and length of stay                                                                                                                      | 2013 | Atsuhiko Murata    | DPC | Surgery            |
| 75 | Time trend of medical economic outcomes of endoscopic submucosal dissection for gastric cancer in Japan: a national database analysis                                                                                                          | 2014 | Atsuhiko Murata    | DPC | Surgery            |
| 76 | Factors associated with the administration of tissue plasminogen activator for acute ischemic stroke                                                                                                                                           | 2014 | Susumu Kunisawa    | DPC | Neurosurgery       |
| 77 | Impact of hospital volume on hospital mortality, length of stay and total costs after pancreaticoduodenectomy                                                                                                                                  | 2014 | Ryuji Yoshioka     | DPC | Surgery            |
| 78 | Effects of edaravone on early outcomes in acute ischemic stroke patients treated with recombinant tissue plasminogen activator                                                                                                                 | 2014 | Tomoki Wada        | DPC | Neurosurgery       |

|    |                                                                                                                                                                                                     |      |                   |     |                   |
|----|-----------------------------------------------------------------------------------------------------------------------------------------------------------------------------------------------------|------|-------------------|-----|-------------------|
| 79 | Impact of guideline-concordant microbiological testing on outcomes of pneumonia                                                                                                                     | 2014 | Hironori Uematsu  | DPC | Internal medicine |
| 80 | Regional differences in performance of bone marrow transplantation, care-resource use and outcome for adult T-cell leukaemia in Japan                                                               | 2014 | Toshiki Maeda     | DPC | Internal medicine |
| 81 | Necrotising soft-tissue infections of the upper limb: risk factors for amputation and death                                                                                                         | 2014 | Kosuke Uehara     | DPC | Orthopedics       |
| 82 | Effects of remifentanyl on in-hospital mortality and length of stay following clipping of intracranial aneurysm: a propensity score-matched analysis                                                | 2014 | Kanji Uchida      | DPC | Anesthesiology    |
| 83 | Effects of fondaparinux on pulmonary embolism following hemiarthroplasty for femoral neck fracture: a retrospective observational study using the Japanese Diagnosis Procedure Combination database | 2014 | Yusuke Tsuda      | DPC | Orthopedics       |
| 84 | Cytoreductive nephrectomy for metastatic renal cell carcinoma: a population-based analysis of perioperative outcomes according to clinical stage                                                    | 2014 | Toshio Takagi     | DPC | Urology           |
| 85 | Age-related differences in outcomes and etiologies of acute abdominal pain based on a national administrative database                                                                              | 2014 | Atsuhiko Murata   | DPC | Surgery           |
| 86 | Body mass index influences the outcome of acute pancreatitis: an analysis based on the Japanese administrative database                                                                             | 2014 | Masashi Taguchi   | DPC | Surgery           |
| 87 | Antithrombin and mortality in severe pneumonia patients with sepsis-associated disseminated intravascular coagulation: an observational nationwide study                                            | 2014 | Takashi Tagami    | DPC | Internal medicine |
| 88 | Impact of systemic steroids on posttonsillectomy bleeding: analysis of 61 430 patients using a national inpatient database in Japan                                                                 | 2014 | Sayaka Suzuki     | DPC | Otolaryngology    |
| 89 | Perioperative factors affecting the occurrence of acute complex regional pain syndrome following limb bone fracture surgery: data from the Japanese Diagnosis Procedure Combination database        | 2014 | Masahiko Sumitani | DPC | Orthopedics       |
| 90 | Factors affecting choice between ureterostomy, ileal conduit and continent reservoir after radical cystectomy: Japanese series                                                                      | 2014 | Toru Sugihara     | DPC | Urology           |
| 91 | Robot-assisted versus other types of radical prostatectomy: population-based safety and cost comparison in Japan, 2012-2013                                                                         | 2014 | Toru Sugihara     | DPC | Urology           |
| 92 | Impact of regional clinical pathways on the length of stay in hospital among stroke patients in Japan                                                                                               | 2014 | Yoshihisa Fujino  | DPC | Neurosurgery      |
| 93 | Performance comparisons in major uro-oncological surgeries between the USA and Japan                                                                                                                | 2014 | Toru Sugihara     | DPC | Urology           |
| 94 | Does mechanical bowel preparation ameliorate damage from rectal injury in radical prostatectomy? Analysis of 151 rectal injury cases                                                                | 2014 | Toru Sugihara     | DPC | Urology           |
| 95 | Acute liver disease in Japan: a nationwide analysis of the Japanese Diagnosis Procedure Combination database                                                                                        | 2014 | Masaya Sato       | DPC | Internal medicine |
| 96 | Prevalence and in-hospital mortality of gastrostomy and jejunostomy in Japan: a retrospective study with a national administrative database                                                         | 2014 | Akahito Sako      | DPC | General medicine  |
| 97 | What is the effect of advanced age and comorbidity on postoperative morbidity and mortality after musculoskeletal tumor surgery?                                                                    | 2014 | Koichi Ogura      | DPC | Orthopedics       |
| 98 | Nomogram predicting severe adverse events after musculoskeletal tumor surgery: analysis of a national administrative database                                                                       | 2014 | Koichi Ogura      | DPC | Orthopedics       |

|     |                                                                                                                                                                                                   |      |                   |     |                    |
|-----|---------------------------------------------------------------------------------------------------------------------------------------------------------------------------------------------------|------|-------------------|-----|--------------------|
| 99  | The recent time trend of outcomes of disseminated intravascular coagulation in Japan: an observational study based on a national administrative database                                          | 2014 | Atsuhiko Murata   | DPC | Emergency medicine |
| 100 | Comparison between enteral nutrition and intravenous hyperalimentation in patients with eating disorders: results from the Japanese diagnosis procedure combination database                      | 2014 | Nobuaki Michihata | DPC | Psychiatry         |
| 101 | Influence of municipality-level mean income on access to aortic valve surgery: a cross-sectional observational study under Japan's universal health-care coverage                                 | 2014 | Seitetsu L Lee    | DPC | Surgery            |
| 102 | Association between hospital case volume and mortality in non-elderly pneumonia patients stratified by severity: a retrospective cohort study                                                     | 2014 | Hiraku Kumamaru   | DPC | Internal medicine  |
| 103 | Postoperative polymyxin B hemoperfusion and mortality in patients with abdominal septic shock: a propensity-matched analysis                                                                      | 2014 | Masao Iwagami     | DPC | Surgery            |
| 104 | Out-of-hospital versus in-hospital Takotsubo cardiomyopathy: analysis of 3719 patients in the Diagnosis Procedure Combination database in Japan                                                   | 2014 | Toshiaki Isogai   | DPC | Internal medicine  |
| 105 | Effect of rehabilitation on mortality of patients with Guillain-Barre Syndrome: a propensity-matched analysis using nationwide database                                                           | 2014 | Haruhi Inokuchi   | DPC | Rehabilitation     |
| 106 | Factors affecting mortality following emergency admission for chronic obstructive pulmonary disease                                                                                               | 2014 | Wakae Hasegawa    | DPC | Internal medicine  |
| 107 | Severe bleeding and perforation are rare complications of endoscopic ultrasound-guided fine needle aspiration for pancreatic masses: an analysis of 3,090 patients from 212 hospitals             | 2014 | Tsuyoshi Hamada   | DPC | Internal medicine  |
| 108 | Impact of hospital volume on outcomes in acute pancreatitis: a study using a nationwide administrative database                                                                                   | 2014 | Tsuyoshi Hamada   | DPC | Surgery            |
| 109 | Endoscopic submucosal dissection for gastric cancer in elderly Japanese patients: an observational study of financial costs of treatment based on a national administrative database              | 2014 | Atsuhiko Murata   | DPC | Surgery            |
| 110 | Effects of additional laparoscopic cholecystectomy on outcomes of laparoscopic gastrectomy in patients with gastric cancer based on a national administrative database                            | 2014 | Atsuhiko Murata   | DPC | Surgery            |
| 111 | Ischemic stroke after cervical spine injury: analysis of 11,005 patients using the Japanese Diagnosis Procedure Combination database                                                              | 2014 | Hiroataka Chikuda | DPC | Orthopedics        |
| 112 | Mortality and morbidity after high-dose methylprednisolone treatment in patients with acute cervical spinal cord injury: a propensity-matched analysis using a nationwide administrative database | 2014 | Hiroataka Chikuda | DPC | Emergency medicine |
| 113 | Thoracic aortic injury in Japan--nationwide retrospective cohort study                                                                                                                            | 2014 | Takashi Tagami    | DPC | Surgery            |
| 114 | The relationship between the number of cardiologists and clinical practice patterns in acute heart failure: a cross-sectional observational study                                                 | 2014 | Noriko Sasaki     | DPC | Internal medicine  |
| 115 | Effects of comprehensive stroke care capabilities on in-hospital mortality of patients with ischemic and hemorrhagic stroke: J-ASPECT study                                                       | 2014 | Koji Iihara       | DPC | Neurosurgery       |
| 116 | Development of a risk-adjusted in-hospital mortality prediction model for community-acquired pneumonia: a retrospective analysis using a Japanese administrative database                         | 2014 | Hironori Uematsu  | DPC | Internal medicine  |
| 117 | Paradoxical association between body mass index and in-hospital mortality in elderly patients with chronic obstructive pulmonary disease in Japan                                                 | 2014 | Yasuhiro Yamauchi | DPC | Internal medicine  |
| 118 | Influence of hospital volume on outcomes of laparoscopic gastrectomy for gastric cancer in patients with comorbidity in Japan                                                                     | 2015 | Atsuhiko Murata   | DPC | Surgery            |

|     |                                                                                                                                                                                        |      |                   |     |                    |
|-----|----------------------------------------------------------------------------------------------------------------------------------------------------------------------------------------|------|-------------------|-----|--------------------|
| 119 | Effect of Japanese Herbal Kampo Medicine Goreisan on Reoperation Rates after Burr-Hole Surgery for Chronic Subdural Hematoma: Analysis of a National Inpatient Database                | 2015 | Hideo Yasunaga    | DPC | Surgery            |
| 120 | Comparison of clinical characteristics and outcomes between aspiration pneumonia and community-acquired pneumonia in patients with chronic obstructive pulmonary disease               | 2015 | Yasuhiro Yamauchi | DPC | Internal medicine  |
| 121 | Comparison of in-hospital mortality in patients with COPD, asthma and asthma-COPD overlap exacerbations                                                                                | 2015 | Yasuhiro Yamauchi | DPC | Internal medicine  |
| 122 | Procedure-based severity index for inpatients: development and validation using administrative database                                                                                | 2015 | Hayato Yamana     | DPC | Other              |
| 123 | Categorized diagnoses and procedure records in an administrative database improved mortality prediction                                                                                | 2015 | Hayato Yamana     | DPC | Other              |
| 124 | Relationship between hospital volume and hemorrhagic complication after percutaneous renal biopsy: results from the Japanese diagnosis procedure combination database                  | 2015 | Hiroyuki Yamamoto | DPC | Urology            |
| 125 | Effectiveness of surgical rib fixation on prolonged mechanical ventilation in patients with traumatic rib fractures: A propensity score-matched analysis                               | 2015 | Tomoki Wada       | DPC | Surgery            |
| 126 | Relationship between hospital volume and early outcomes in acute ischemic stroke patients treated with recombinant tissue plasminogen activator                                        | 2015 | Tomoki Wada       | DPC | Neurosurgery       |
| 127 | Association between dementia and postoperative complications after hip fracture surgery in the elderly: analysis of 87,654 patients using a national administrative database           | 2015 | Yusuke Tsuda      | DPC | Orthopedics        |
| 128 | Comparison of short-term mortality and morbidity between parenteral and enteral nutrition for adults without cancer: a propensity-matched analysis using a national inpatient database | 2015 | Hiroyuki Tamiya   | DPC | General medicine   |
| 129 | Hypnotics and the Occurrence of Bone Fractures in Hospitalized Dementia Patients: A Matched Case-Control Study Using a National Inpatient Database                                     | 2015 | Hiroyuki Tamiya   | DPC | General medicine   |
| 130 | Descriptive epidemiology of children hospitalized for inflammatory bowel disease in Japan: Inpatient database analysis                                                                 | 2015 | Masato Takeuchi   | DPC | Pediatrics         |
| 131 | Low-dose corticosteroid use and mortality in severe community-acquired pneumonia patients                                                                                              | 2015 | Takashi Tagami    | DPC | Internal medicine  |
| 132 | Low-dose corticosteroid treatment and mortality in refractory abdominal septic shock after emergency laparotomy                                                                        | 2015 | Takashi Tagami    | DPC | Emergency medicine |
| 133 | Intravenous immunoglobulin use in septic shock patients after emergency laparotomy                                                                                                     | 2015 | Takashi Tagami    | DPC | Emergency medicine |
| 134 | Intravenous immunoglobulin and mortality in pneumonia patients with septic shock: an observational nationwide study                                                                    | 2015 | Takashi Tagami    | DPC | Internal medicine  |
| 135 | The Impact of Patient Profiles and Procedures on Hospitalization Costs through Length of Stay in Community-Acquired Pneumonia Patients Based on a Japanese Administrative Database     | 2015 | Hironori Uematsu  | DPC | Internal medicine  |
| 136 | Supplemental dose of antithrombin use in disseminated intravascular coagulation patients after abdominal sepsis                                                                        | 2015 | Takashi Tagami    | DPC | Emergency medicine |
| 137 | Validation of the prognostic burn index: a nationwide retrospective study                                                                                                              | 2015 | Takashi Tagami    | DPC | Emergency medicine |
| 138 | Use of recombinant human soluble thrombomodulin in patients with sepsis-induced disseminated intravascular coagulation after intestinal perforation                                    | 2015 | Takashi Tagami    | DPC | Emergency medicine |

|     |                                                                                                                                                                                                                            |      |                    |     |                    |
|-----|----------------------------------------------------------------------------------------------------------------------------------------------------------------------------------------------------------------------------|------|--------------------|-----|--------------------|
| 139 | Recombinant human soluble thrombomodulin and mortality in severe pneumonia patients with sepsis-associated disseminated intravascular coagulation: an observational nationwide study                                       | 2015 | Takashi Tagami     | DPC | Internal medicine  |
| 140 | Complication rates after functional endoscopic sinus surgery: analysis of 50,734 Japanese patients                                                                                                                         | 2015 | Sayaka Suzuki      | DPC | Otolaryngology     |
| 141 | Factors associated with severe epiglottitis in adults: Analysis of a Japanese inpatient database                                                                                                                           | 2015 | Sayaka Suzuki      | DPC | Otolaryngology     |
| 142 | Prophylactic effect of fondaparinux and enoxaparin for preventing pulmonary embolism after total hip or knee arthroplasty: A retrospective observational study using the Japanese Diagnosis Procedure Combination database | 2015 | Naoko Shouda       | DPC | Orthopedics        |
| 143 | Variceal hemorrhage: Analysis of 9987 cases from a Japanese nationwide database                                                                                                                                            | 2015 | Masaya Sato        | DPC | Internal medicine  |
| 144 | The Volume-Outcome Relationship in Critically Ill Patients in Relation to the ICU-to-Hospital Bed Ratio                                                                                                                    | 2015 | Yusuke Sasabuchi   | DPC | Emergency medicine |
| 145 | The Dose-Response Relationship Between Body Mass Index and Mortality in Subjects Admitted to the ICU With and Without Mechanical Ventilation                                                                               | 2015 | Yusuke Sasabuchi   | DPC | Emergency medicine |
| 146 | Hospitalization for Hypoglycemia in Japanese Diabetic Patients: A Retrospective Study Using a National Inpatient Database, 2008-2012                                                                                       | 2015 | Akahito Sako       | DPC | Internal medicine  |
| 147 | Effect of Hospital Volume on Outcomes of Surgery for Cleft Lip and Palate                                                                                                                                                  | 2015 | Sachiko Ono        | DPC | Plastic surgery    |
| 148 | Perioperative stroke in patients undergoing elective spinal surgery: a retrospective analysis using the Japanese diagnosis procedure combination database                                                                  | 2015 | Junichi Ohya       | DPC | Orthopedics        |
| 149 | Difference in Outcomes of Rectal Foreign Bodies between Males and Females: A Retrospective Analysis of a National Inpatient Database in Japan                                                                              | 2015 | Hiroyuki Odagiri   | DPC | Surgery            |
| 150 | Factors associated with perforation related to diagnostic balloon-assisted enteroscopy: analysis of a national inpatient database in Japan                                                                                 | 2015 | Hiroyuki Odagiri   | DPC | Internal medicine  |
| 151 | Choice of renal replacement therapy modality in intensive care units: data from a Japanese Nationwide Administrative Claim Database                                                                                        | 2015 | Takehiro Matsubara | DPC | Emergency medicine |
| 152 | Hospital volume and the occurrence of bleeding and perforation after colorectal endoscopic submucosal dissection: analysis of a national administrative database in Japan                                                  | 2015 | Hiroyuki Odagiri   | DPC | Surgery            |
| 153 | Factors affecting in-hospital mortality in patients with lower gastrointestinal tract bleeding: a retrospective study using a national database in Japan                                                                   | 2015 | Ryota Niikura      | DPC | Internal medicine  |
| 154 | Short-term outcomes following elective transcatheter arterial embolization for splenic artery aneurysms: data from a nationwide administrative database                                                                    | 2015 | Michio Naganuma    | DPC | Radiology          |
| 155 | Outcomes after early or late timing of surgery for infective endocarditis with ischaemic stroke: a retrospective cohort study                                                                                              | 2015 | Kojiro Morita      | DPC | Surgery            |
| 156 | Effect of early rehabilitation by physical therapists on in-hospital mortality after aspiration pneumonia in the elderly                                                                                                   | 2015 | Ryo Momosaki       | DPC | Rehabilitation     |
| 157 | Effects of proton pump inhibitor on outcomes of patients with severe acute pancreatitis based on a national administrative database                                                                                        | 2015 | Atsuhiko Murata    | DPC | Surgery            |
| 158 | Effect of dysphagia rehabilitation on oral intake in elderly patients with aspiration pneumonia                                                                                                                            | 2015 | Ryo Momosaki       | DPC | Rehabilitation     |
| 159 | Clinical Features of Adult Patients Admitted to Pediatric Wards in Japan                                                                                                                                                   | 2015 | Nobuaki Michihata  | DPC | Pediatrics         |
| 160 | Guideline-Concordant Treatment of Kawasaki Disease With Immunoglobulin and Aspirin and the Incidence of Coronary Artery Aneurysm                                                                                           | 2015 | Nobuaki Michihata  | DPC | Pediatrics         |

|     |                                                                                                                                                                                              |      |                 |     |                    |
|-----|----------------------------------------------------------------------------------------------------------------------------------------------------------------------------------------------|------|-----------------|-----|--------------------|
| 161 | Variation in Risk-Standardized Mortality of Stroke among Hospitals in Japan                                                                                                                  | 2015 | Hiroki Matsui   | DPC | Neurosurgery       |
| 162 | Effectiveness of Hospital Functions for Acute Ischemic Stroke Treatment on In-Hospital Mortality: Results From a Nationwide Survey in Japan                                                  | 2015 | Tetsuya Iwamoto | DPC | Neurosurgery       |
| 163 | Current state of continuous renal replacement therapy for acute kidney injury in Japanese intensive care units in 2011: analysis of a national administrative database                       | 2015 | Masao Iwagami   | DPC | Emergency medicine |
| 164 | Influence of comorbidity on outcomes of older patients with acute pancreatitis based on a national administrative database                                                                   | 2015 | Atsuhiko Murata | DPC | Surgery            |
| 165 | Geographical analysis of aneurysmal subarachnoid hemorrhage in Japan utilizing publically-accessible DPC database                                                                            | 2015 | Toru Fukuhara   | DPC | Neurosurgery       |
| 166 | Clinical Practice Patterns in Constrictive Pericarditis Patients With Heart Failure: A Retrospective Cohort Study Using a National Inpatient Database in Japan                               | 2015 | Toshiaki Isogai | DPC | Surgery            |
| 167 | Effect of weekend admission for acute myocardial infarction on in-hospital mortality: a retrospective cohort study                                                                           | 2015 | Toshiaki Isogai | DPC | Internal medicine  |
| 168 | Preoperative factors affecting cost and length of stay for isolated off-pump coronary artery bypass grafting: hierarchical linear model analysis                                             | 2015 | Daisuke Shinjo  | DPC | Surgery            |
| 169 | Observational study to compare antithrombin and thrombomodulin for disseminated intravascular coagulation                                                                                    | 2015 | Atsuhiko Murata | DPC | Emergency medicine |
| 170 | Effect of intravenous immunoglobulin for fulminant myocarditis on in-hospital mortality: propensity score analyses                                                                           | 2015 | Toshiaki Isogai | DPC | Internal medicine  |
| 171 | Serious cardiac complications in coronary spasm provocation tests using acetylcholine or ergonovine: analysis of 21 512 patients from the diagnosis procedure combination database in Japan  | 2015 | Toshiaki Isogai | DPC | Internal medicine  |
| 172 | Hospital volume and cardiac complications of endomyocardial biopsy: a retrospective cohort study of 9508 adult patients using a nationwide inpatient database in Japan                       | 2015 | Toshiaki Isogai | DPC | Internal medicine  |
| 173 | Effectiveness of inferior vena cava filters on mortality as an adjuvant to antithrombotic therapy                                                                                            | 2015 | Toshiaki Isogai | DPC | Internal medicine  |
| 174 | Medical procedures and outcomes of Japanese patients with trisomy 18 or trisomy 13: analysis of a nationwide administrative database of hospitalized patients                                | 2015 | Kazue Ishitsuka | DPC | Pediatrics         |
| 175 | Factors that predict in-hospital mortality in eosinophilic granulomatosis with polyangiitis                                                                                                  | 2015 | Wajae Hasegawa  | DPC | Internal medicine  |
| 176 | Effect of dementia on outcomes of elderly patients with hemorrhagic peptic ulcer disease based on a national administrative database                                                         | 2015 | Atsuhiko Murata | DPC | Internal medicine  |
| 177 | Clinical features of 280 hospitalized patients with lymphangioliomyomatosis in Japan                                                                                                         | 2015 | Wakae Hasegawa  | DPC | Surgery            |
| 178 | Bleeding after endoscopic sphincterotomy or papillary balloon dilation among users of antithrombotic agents                                                                                  | 2015 | Tsuyoshi Hamada | DPC | Surgery            |
| 179 | Severe bleeding after percutaneous transhepatic drainage of the biliary system: effect of antithrombotic agents--analysis of 34 606 cases from a Japanese nationwide administrative database | 2015 | Tsuyoshi Hamada | DPC | Internal medicine  |
| 180 | Factors associated with 30-day readmission of patients with heart failure from a Japanese administrative database                                                                            | 2015 | Hiroki Aizawa   | DPC | Internal medicine  |

|     |                                                                                                                                                                                           |      |                   |     |                    |
|-----|-------------------------------------------------------------------------------------------------------------------------------------------------------------------------------------------|------|-------------------|-----|--------------------|
| 181 | Impact of obesity on outcomes of paediatric acute pancreatitis based on a national administrative database                                                                                | 2016 | Atsuhiko Murata   | DPC | Pediatrics         |
| 182 | Relationship Between Depressive State and Treatment Characteristics of Acute Cervical Spinal Cord Injury in Japan                                                                         | 2016 | Yasufumi Matsuda  | DPC | Orthopedics        |
| 183 | Recent Change in Treatment of Disseminated Intravascular Coagulation in Japan: An Epidemiological Study Based on a National Administrative Database                                       | 2016 | Atsuhiko Murata   | DPC | Emergency medicine |
| 184 | Mortality associated with bone fractures in COPD patients                                                                                                                                 | 2016 | Yasuhiro Yamauchi | DPC | Internal medicine  |
| 185 | De-escalation versus continuation of empirical antimicrobial therapy in community-acquired pneumonia                                                                                      | 2016 | Hayato Yamana     | DPC | Internal medicine  |
| 186 | In-hospital mortality and treatment patterns in acute myocardial infarction patients admitted during national cardiology meeting dates                                                    | 2016 | Seiko Mizuno      | DPC | Internal medicine  |
| 187 | Association Between Colorectal Cancer and Atherosclerotic Diseases: A Study Using a National Inpatient Database in Japan                                                                  | 2016 | Yutaka Yamaji     | DPC | Internal medicine  |
| 188 | Postoperative outcomes of major lower extremity amputations in patients with diabetes and peripheral artery disease: analysis using the Diagnosis Procedure Combination database in Japan | 2016 | Keiko Yamada      | DPC | Internal medicine  |
| 189 | Effect of early rehabilitation on activities of daily living in patients with aspiration pneumonia                                                                                        | 2016 | Maiko Yagi        | DPC | Rehabilitation     |
| 190 | Ozagrel for Patients With Noncardioembolic Ischemic Stroke: A Propensity Score-Matched Analysis                                                                                           | 2016 | Tomoki Wada       | DPC | Neurosurgery       |
| 191 | Outcomes of Argatroban Treatment in Patients With Atherothrombotic Stroke: Observational Nationwide Study in Japan                                                                        | 2016 | Tomoki Wada       | DPC | Neurosurgery       |
| 192 | Complications and Postoperative Mortality Rate After Surgery for Pathological Femur Fracture Related to Bone Metastasis: Analysis of a Nationwide Database                                | 2016 | Yusuke Tsuda      | DPC | Orthopedics        |
| 193 | Amiodarone or nifekalant upon hospital arrival for refractory ventricular fibrillation after out-of-hospital cardiac arrest                                                               | 2016 | Takashi Tagami    | DPC | Emergency medicine |
| 194 | Early antibiotics administration during targeted temperature management after out-of-hospital cardiac arrest: a nationwide database study                                                 | 2016 | Takashi Tagami    | DPC | Emergency medicine |
| 195 | Amiodarone Compared with Lidocaine for Out-Of-Hospital Cardiac Arrest with Refractory Ventricular Fibrillation on Hospital Arrival: a Nationwide Database Study                           | 2016 | Takashi Tagami    | DPC | Emergency medicine |
| 196 | Changes in Therapeutic Hypothermia and Coronary Intervention Provision and In-Hospital Mortality of Patients With Out-of-Hospital Cardiac Arrest: A Nationwide Database Study             | 2016 | Takashi Tagami    | DPC | Emergency medicine |
| 197 | Prophylactic Antibiotics May Improve Outcome in Patients With Severe Burns Requiring Mechanical Ventilation: Propensity Score Analysis of a Japanese Nationwide Database                  | 2016 | Takashi Tagami    | DPC | Emergency medicine |
| 198 | Time Trend of Outcomes for Severe Acute Pancreatitis After Publication of Japanese Guidelines Based on a National Administrative Database                                                 | 2016 | Atsuhiko Murata   | DPC | Surgery            |
| 199 | Cerebral infarction after intraarterial and intravenous chemoradiotherapy for head and neck cancer: A retrospective analysis using a Japanese inpatient database                          | 2016 | Sayaka Suzuki     | DPC | Otolaryngology     |
| 200 | Impact of weekend admission on in-hospital mortality in severe community-acquired pneumonia patients in Japan                                                                             | 2016 | Hironori Uematsu  | DPC | Internal medicine  |
| 201 | Factors Associated With Neck Hematoma After Thyroidectomy: A Retrospective Analysis Using a Japanese Inpatient Database                                                                   | 2016 | Sayaka Suzuki     | DPC | Otolaryngology     |

|     |                                                                                                                                                                                                      |      |                   |     |                    |
|-----|------------------------------------------------------------------------------------------------------------------------------------------------------------------------------------------------------|------|-------------------|-----|--------------------|
| 202 | Factors associated with prolonged duration of post-tympanoplasty local treatment in adult chronic otitis media patients: A retrospective observational study using a Japanese inpatient database     | 2016 | Sayaka Suzuki     | DPC | Otolaryngology     |
| 203 | Pharyngocutaneous fistula and delay in free oral feeding after pharyngolaryngectomy for hypopharyngeal cancer                                                                                        | 2016 | Sayaka Suzuki     | DPC | Otolaryngology     |
| 204 | Hospital Volume and Mortality in Mechanically Ventilated Children: Analysis of a National Inpatient Database in Japan                                                                                | 2016 | Ryuji Sasaki      | DPC | Pediatrics         |
| 205 | Factors Associated With Mortality of Thyroid Storm: Analysis Using a National Inpatient Database in Japan                                                                                            | 2016 | Yosuke Ono        | DPC | Internal medicine  |
| 206 | Impact of Body Mass Index on the Outcomes of Open Reduction for Mandibular Fractures                                                                                                                 | 2016 | Sachiko Ono       | DPC | Surgery            |
| 207 | Does the microendoscopic technique reduce mortality and major complications in patients undergoing lumbar discectomy? A propensity score-matched analysis using a nationwide administrative database | 2016 | Junichi Ohya      | DPC | Orthopedics        |
| 208 | Factors predicting adverse events associated with therapeutic colonoscopy for colorectal neoplasia: a retrospective nationwide study in Japan                                                        | 2016 | Ryota Niikura     | DPC | Surgery            |
| 209 | Mortality-Reducing Effect of Rehabilitation for COPD: Observational Propensity-Matched Cohort Study Using a Nationwide Database                                                                      | 2016 | Yasuo Nakahara    | DPC | Rehabilitation     |
| 210 | Very Early versus Delayed Rehabilitation for Acute Ischemic Stroke Patients with Intravenous Recombinant Tissue Plasminogen Activator: A Nationwide Retrospective Cohort Study                       | 2016 | Ryo Momosaki      | DPC | Rehabilitation     |
| 211 | Proton Pump Inhibitors versus Histamine-2 Receptor Antagonists and Risk of Pneumonia in Patients with Acute Stroke                                                                                   | 2016 | Ryo Momosaki      | DPC | Neurosurgery       |
| 212 | Predictive factors for oral intake after aspiration pneumonia in older adults                                                                                                                        | 2016 | Ryo Momosaki      | DPC | Internal medicine  |
| 213 | Hospital volume and mortality due to preterm patent ductus arteriosus                                                                                                                                | 2016 | Nobuaki Michihata | DPC | Pediatrics         |
| 214 | Time trends and risk factors for perioperative complications in total ankle arthroplasty: retrospective analysis using a national database in Japan                                                  | 2016 | Takumi Matsumoto  | DPC | Orthopedics        |
| 215 | Risk of infectious complications associated with blood transfusion in elective spinal surgery-a propensity score matched analysis                                                                    | 2016 | So Kato           | DPC | Orthopedics        |
| 216 | Potential Survival Benefit of Polymyxin B Hemoperfusion in Septic Shock Patients on Continuous Renal Replacement Therapy: A Propensity-Matched Analysis                                              | 2016 | Masao Iwagami     | DPC | Emergency medicine |
| 217 | A mortality prediction rule for non-elderly patients with community-acquired pneumonia                                                                                                               | 2016 | Masato Tashiro    | DPC | Internal medicine  |
| 218 | Atrial natriuretic peptide therapy and in-hospital mortality in acute myocardial infarction patients undergoing percutaneous coronary intervention                                                   | 2016 | Toshiaki Isogai   | DPC | Internal medicine  |
| 219 | Hospital mortality of patients aged 80 and older after surgical repair for type A acute aortic dissection in Japan                                                                                   | 2016 | Tetsu Ohnuma      | DPC | Surgery            |
| 220 | Epidemiological study of adult-onset Still's disease using a Japanese administrative database                                                                                                        | 2016 | Nobuo Sakata      | DPC | Internal medicine  |
| 221 | Early $\beta$ -blocker use and in-hospital mortality in patients with Takotsubo cardiomyopathy                                                                                                       | 2016 | Toshiaki Isogai   | DPC | Internal medicine  |
| 222 | Relationship between hospital volume and major cardiac complications of rotational atherectomy: A nationwide retrospective cohort study in Japan                                                     | 2016 | Toshiaki Isogai   | DPC | Internal medicine  |



|     |                                                                                                                                                                                            |      |                     |     |                    |
|-----|--------------------------------------------------------------------------------------------------------------------------------------------------------------------------------------------|------|---------------------|-----|--------------------|
| 223 | Risk Factors for Free Flap Failure in 2,846 Patients With Head and Neck Cancer: A National Database Study in Japan                                                                         | 2016 | Miho Ishimaru       | DPC | Plastic surgery    |
| 224 | Effect of intravenous magnesium sulfate on mortality in patients with severe acute asthma                                                                                                  | 2016 | Junko Hirashima     | DPC | Internal medicine  |
| 225 | No weekend effect on outcomes of severe acute pancreatitis in Japan: data from the diagnosis procedure combination database                                                                | 2016 | Tsuyoshi Hamada     | DPC | Surgery            |
| 226 | The Current Status of Cardiovascular Medicine in Japan - Analysis of a Large Number of Health Records From a Nationwide Claim-Based Database, JROAD-DPC                                    | 2016 | Satoshi Yasuda      | DPC | Internal medicine  |
| 227 | Interstitial lung disease associated with gemcitabine: A Japanese retrospective cohort study                                                                                               | 2016 | Tsuyoshi Hamada     | DPC | Internal medicine  |
| 228 | In-hospital mortality and successful weaning from venoarterial extracorporeal membrane oxygenation: analysis of 5,263 patients using a national inpatient database in Japan                | 2016 | Shotaro Aso         | DPC | Emergency medicine |
| 229 | The Effect of Intraaortic Balloon Pumping Under Venoarterial Extracorporeal Membrane Oxygenation on Mortality of Cardiogenic Patients: An Analysis Using a Nationwide Inpatient Database   | 2016 | Shotaro Aso         | DPC | Emergency medicine |
| 230 | Diabetes Affects Length of Stay and Hospital Costs for Elderly Patients with Pneumonia: An Analysis of a Hospital Administrative Database                                                  | 2016 | Yusuke Kabeya       | DPC | Internal medicine  |
| 231 | Efficacy of concurrent treatments in idiopathic pulmonary fibrosis patients with a rapid progression of respiratory failure: an analysis of a national administrative database in Japan    | 2016 | Keishi Oda          | DPC | Internal medicine  |
| 232 | Association of Palliative Care Consultation With Reducing Inpatient Chemotherapy Use in Elderly Patients With Cancer in Japan: Analysis Using a Nationwide Administrative Database         | 2017 | Motoko Sano         | DPC | Surgery            |
| 233 | Impact of Rehabilitation on Outcomes in Patients With Ischemic Stroke: A Nationwide Retrospective Cohort Study in Japan                                                                    | 2017 | Maiko Yagi          | DPC | Rehabilitation     |
| 234 | Development and validation of a new ICD-10-based trauma mortality prediction scoring system using a Japanese national inpatient database                                                   | 2017 | Tomoki Wada         | DPC | Emergency medicine |
| 235 | Relationship between hospital volume and outcomes in patients with traumatic brain injury: A retrospective observational study using a national inpatient database in Japan                | 2017 | Tomoki Wada         | DPC | Neurosurgery       |
| 236 | Adjuvant chemotherapy versus chemoradiotherapy for small cell lung cancer with lymph node metastasis: a retrospective observational study with use of a national database in Japan         | 2017 | Hirokazu Urushiyama | DPC | Internal medicine  |
| 237 | Pediatric urolithiasis associated with acute gastroenteritis: an inpatient database study in Japan                                                                                         | 2017 | Masato Takeuchi     | DPC | Pediatrics         |
| 238 | The Current Status of Microvascular Decompression for the Treatment of Hemifacial Spasm in Japan: An Analysis of 2907 Patients Using the Japanese Diagnosis Procedure Combination Database | 2017 | Yoshifumi Mizobuchi | DPC | Neurosurgery       |
| 239 | Antithrombin use and 28-day in-hospital mortality among severe-burn patients: an observational nationwide study                                                                            | 2017 | Takashi Tagami      | DPC | Emergency medicine |
| 240 | Accessibility to surgical robot technology and prostate-cancer patient behavior for prostatectomy                                                                                          | 2017 | Toru Sugihara       | DPC | Urology            |
| 241 | In-hospital complications after implantation of cardiac implantable electronic devices: Analysis of a national inpatient database in Japan                                                 | 2017 | Sandeep Shakya      | DPC | Internal medicine  |

|     |                                                                                                                                                                                                        |      |                  |     |                    |
|-----|--------------------------------------------------------------------------------------------------------------------------------------------------------------------------------------------------------|------|------------------|-----|--------------------|
| 242 | Mortality and hemorrhagic complications associated with radiofrequency ablation for treatment of hepatocellular carcinoma in patients on hemodialysis for end-stage renal disease: A nationwide survey | 2017 | Masaya Sato      | DPC | Internal medicine  |
| 243 | The ADOPT-LC score: a novel predictive index of in-hospital mortality of cirrhotic patients following surgical procedures, based on a national survey                                                  | 2017 | Masaya Sato      | DPC | Surgery            |
| 244 | Association between hospital volume and in-hospital mortality following radiofrequency ablation for hepatocellular carcinoma                                                                           | 2017 | Masaya Sato      | DPC | Internal medicine  |
| 245 | Epidural analgesia is infrequently used in patients with acute pancreatitis : a retrospective cohort study                                                                                             | 2017 | Yusuke Sasabuchi | DPC | Anesthesiology     |
| 246 | Increase in avoidable hospital admissions after the Great East Japan Earthquake                                                                                                                        | 2017 | Yusuke Sasabuchi | DPC | Emergency medicine |
| 247 | Hospitalization with hypoglycemia in patients without diabetes mellitus: A retrospective study using a national inpatient database in Japan, 2008-2012                                                 | 2017 | Akahito Sako     | DPC | Internal medicine  |
| 248 | Development of a nomogram for predicting in-hospital mortality of patients with exacerbation of chronic obstructive pulmonary disease                                                                  | 2017 | Yukiyo Sakamoto  | DPC | Internal medicine  |
| 249 | Guidelines-concordant empiric antimicrobial therapy and mortality in patients with severe community-acquired pneumonia requiring mechanical ventilation                                                | 2017 | Yukiyo Sakamoto  | DPC | Internal medicine  |
| 250 | Clinical features and practice patterns of treatment for adrenal crisis: a nationwide cross-sectional study in Japan                                                                                   | 2017 | Yosuke Ono       | DPC | Internal medicine  |
| 251 | Clinical characteristics and outcomes of myxedema coma: Analysis of a national inpatient database in Japan                                                                                             | 2017 | Yosuke Ono       | DPC | Internal medicine  |
| 252 | Impact of pediatric obesity on acute asthma exacerbation in Japan                                                                                                                                      | 2017 | Yusuke Okubo     | DPC | Pediatrics         |
| 253 | Mortality and morbidity after spinal surgery in patients with Parkinson's disease: a retrospective matched-pair cohort study                                                                           | 2017 | Takeshi Oichi    | DPC | Internal medicine  |
| 254 | Seasonal Variations in the Risk of Reoperation for Surgical Site Infection Following Elective Spinal Fusion Surgery: A Retrospective Study Using the Japanese Diagnosis Procedure Combination Database | 2017 | Junichi Ohya     | DPC | Orthopedics        |
| 255 | Hospital volume and adverse events following esophageal endoscopic submucosal dissection in Japan                                                                                                      | 2017 | Hiroyuki Odagiri | DPC | Surgery            |
| 256 | Surgery versus percutaneous transcatheter embolization for pulmonary arteriovenous malformation: Analysis of a national inpatient database in Japan                                                    | 2017 | Masaaki Nagano   | DPC | Surgery            |
| 257 | Outcomes after early and delayed rehabilitation for exacerbation of chronic obstructive pulmonary disease: a nationwide retrospective cohort study in Japan                                            | 2017 | Hiroki Matsui    | DPC | Rehabilitation     |
| 258 | Safety of Tranexamic Acid in Pediatric Cardiac Surgery: A Nationwide Database Study                                                                                                                    | 2017 | Takuma Maeda     | DPC | Pediatrics         |
| 259 | Efficacy of early sivelestat administration on acute lung injury and acute respiratory distress syndrome                                                                                               | 2017 | Takashi Kido     | DPC | Internal medicine  |
| 260 | Sivelestat sodium and mortality in pneumonia patients requiring mechanical ventilation: propensity score analysis of a Japanese nationwide database                                                    | 2017 | Miwa Kishimoto   | DPC | Emergency medicine |

|     |                                                                                                                                                                                                         |      |                 |     |                           |
|-----|---------------------------------------------------------------------------------------------------------------------------------------------------------------------------------------------------------|------|-----------------|-----|---------------------------|
| 261 | Annual trends in knee arthroplasty and tibial osteotomy: Analysis of a national database in Japan                                                                                                       | 2017 | Manabu Kawata   | DPC | Orthopedics               |
| 262 | Effect of reducing cost sharing for outpatient care on children's inpatient services in Japan                                                                                                           | 2017 | Hiroataka Kato  | DPC | Pediatrics                |
| 263 | Association between dementia and discharge status in patients hospitalized with pneumonia                                                                                                               | 2017 | Taisuke Jo      | DPC | Internal medicine         |
| 264 | Impact of end-stage renal disease on hospital outcomes among patients admitted to intensive care units: A retrospective matched-pair cohort study                                                       | 2017 | Masao Iwagami   | DPC | Emergency medicine        |
| 265 | The degree of severity and trends in hospital standardized mortality ratios in Japan between 2008 and 2012: a retrospective observational study                                                         | 2017 | Daisuke Shinjo  | DPC | Other                     |
| 266 | In-hospital management and outcomes in patients with peripartum cardiomyopathy: a descriptive study using a national inpatient database in Japan                                                        | 2017 | Toshiaki Isogai | DPC | Obstetrics and gynecology |
| 267 | Treatments and in-hospital mortality in acute myocardial infarction patients with rheumatoid arthritis: a nationwide retrospective cohort study in Japan                                                | 2017 | Toshiaki Isogai | DPC | Internal medicine         |
| 268 | Development and validation of a score for evaluating comprehensive stroke care capabilities: J-ASPECT Study                                                                                             | 2017 | Akiko Kada      | DPC | Neurosurgery              |
| 269 | Factors affecting in-hospital mortality and likelihood of undergoing surgical resection in patients with primary cardiac tumors                                                                         | 2017 | Toshiaki Isogai | DPC | Surgery                   |
| 270 | Factors affecting prolonged length of stay in psychiatric patients in Japan: A retrospective observational study                                                                                        | 2017 | Daisuke Shinjo  | DPC | Psychiatry                |
| 271 | Prognostic nomogram for inpatients with asthma exacerbation                                                                                                                                             | 2017 | Wakae Hasegawa  | DPC | Internal medicine         |
| 272 | Resuscitative endovascular balloon occlusion of the aorta or resuscitative thoracotomy with aortic clamping for noncompressible torso hemorrhage: A retrospective nationwide study                      | 2017 | Shotaro Aso     | DPC | Surgery                   |
| 273 | Risk Factors for In-hospital Mortality and Reamputation Following Lower Limb Amputation                                                                                                                 | 2017 | Sachiko Endoh   | DPC | Orthopedics               |
| 274 | Adjunctive corticosteroid therapy for inpatients with Mycoplasma pneumoniae pneumonia                                                                                                                   | 2017 | Masato Tashiro  | DPC | Internal medicine         |
| 275 | Dialysis Case Volume Associated With In-Hospital Mortality in Maintenance Dialysis Patients                                                                                                             | 2017 | Shintaro Mandai | DPC | Internal medicine         |
| 276 | Effect of treatment modality on in-hospital outcome in patients with subarachnoid hemorrhage: a nationwide study in Japan (J-ASPECT Study)                                                              | 2018 | Ryota Kurogi    | DPC | Neurosurgery              |
| 277 | Impact of continuous regional arterial infusion in the treatment of acute necrotizing pancreatitis: analysis of a national administrative database                                                      | 2018 | Akira Endo      | DPC | Surgery                   |
| 278 | Present epidemiology of chronic subdural hematoma in Japan: analysis of 63,358 cases recorded in a national administrative database                                                                     | 2018 | Hiroyuki Toi    | DPC | Neurosurgery              |
| 279 | Clinical characteristics of patients with Takotsubo syndrome diagnosed without coronary artery evaluation: A retrospective nationwide study                                                             | 2018 | Toshiaki Isogai | DPC | Internal medicine         |
| 280 | Increased Severe Trauma Patient Volume is Associated With Survival Benefit and Reduced Total Health Care Costs: A Retrospective Observational Study Using a Japanese Nationwide Administrative Database | 2018 | Akira Endo      | DPC | Emergency medicine        |
| 281 | Hospital quality reporting and improvement in quality of care for patients with acute myocardial infarction                                                                                             | 2018 | Hayato Yamana   | DPC | Internal medicine         |

|     |                                                                                                                                                                                                                                           |      |                     |     |                    |
|-----|-------------------------------------------------------------------------------------------------------------------------------------------------------------------------------------------------------------------------------------------|------|---------------------|-----|--------------------|
| 282 | Association Between Early Rehabilitation and Mobility Status in Elderly Inpatients with Heart Failure: A Nationwide Retrospective Cohort Study                                                                                            | 2018 | Maiko Yagi          | DPC | Rehabilitation     |
| 283 | Development and validation of an ICD-10-based disability predictive index for patients admitted to hospitals with trauma                                                                                                                  | 2018 | Tomoki Wada         | DPC | Emergency medicine |
| 284 | Impact of hospital volume on mortality in patients with severe torso injury                                                                                                                                                               | 2018 | Tomoki Wada         | DPC | Emergency medicine |
| 285 | Effect of Hangeshashin-To (Japanese Herbal Medicine Tj-14) on Tolerability of Irinotecan: Propensity Score and Instrumental Variable Analyses                                                                                             | 2018 | Hirokazu Urushiyama | DPC | Internal medicine  |
| 286 | Oral fluorouracil vs vinorelbine plus cisplatin as adjuvant chemotherapy for stage II-III non-small cell lung cancer: Propensity score-matched and instrumental variable analyses                                                         | 2018 | Hirokazu Urushiyama | DPC | Internal medicine  |
| 287 | Trends of neuraminidase inhibitors use in children with influenza related respiratory infections                                                                                                                                          | 2018 | Kazuhiro Uda        | DPC | Pediatrics         |
| 288 | Effect of plasma exchange on in-hospital mortality in patients with pulmonary hemorrhage secondary to antineutrophil cytoplasmic antibody-associated vasculitis: A propensity-matched analysis using a nationwide administrative database | 2018 | Eishi Uechi         | DPC | Internal medicine  |
| 289 | Tracheostomy and mortality in patients with severe burns: A nationwide observational study                                                                                                                                                | 2018 | Asuka Tsuchiya      | DPC | Emergency medicine |
| 290 | Outcomes of patients receiving a massive transfusion for major trauma                                                                                                                                                                     | 2018 | Akira Endo          | DPC | Emergency medicine |
| 291 | Mortality and Morbidity After Hartmann's Procedure Versus Primary Anastomosis Without a Diverting Stoma for Colorectal Perforation: A Nationwide Observational Study                                                                      | 2018 | Asuka Tsuchiya      | DPC | Surgery            |
| 292 | In-hospital mortality and morbidity of pediatric scoliosis surgery in Japan: Analysis using a national inpatient database                                                                                                                 | 2018 | Yuki Taniguchi      | DPC | Pediatrics         |
| 293 | Association between sugammadex and anaphylaxis in pediatric patients: A nested case-control study using a national inpatient database                                                                                                     | 2018 | Fumio Tadokoro      | DPC | Anesthesiology     |
| 294 | Trend in otolaryngological surgeries in an era of super-aging: Descriptive statistics using a Japanese inpatient database                                                                                                                 | 2018 | Sayaka Suzuki       | DPC | Otolaryngology     |
| 295 | Postoperative mechanical bowel obstruction after pharyngolaryngectomy for hypopharyngeal cancer: Retrospective analysis using a Japanese inpatient database                                                                               | 2018 | Sayaka Suzuki       | DPC | Otolaryngology     |
| 296 | Mortality and morbidity after hepatic resection in patients undergoing hemodialysis: analysis of a national inpatient database in Japan                                                                                                   | 2018 | Hiroji Shinkawa     | DPC | Surgery            |
| 297 | Timing of surgery for hip fractures in the elderly: A retrospective cohort study                                                                                                                                                          | 2018 | Yusuke Sasabuchi    | DPC | Orthopedics        |
| 298 | End-of-life care for cancer patients in Japanese acute care hospitals: A nationwide retrospective administrative database survey                                                                                                          | 2018 | Yuko Sato           | DPC | Surgery            |
| 299 | Japanese Herbal Kampo Hochu-Ekki-To or Juzen-Taiho-To after Surgery for Hip Fracture Does Not Reduce Infectious Complications                                                                                                             | 2018 | Yusuke Sasabuchi    | DPC | Orthopedics        |
| 300 | Comparative effectiveness of elemental formula in the early enteral nutrition management of acute pancreatitis: a retrospective cohort study                                                                                              | 2018 | Akira Endo          | DPC | Surgery            |
| 301 | Treatment selection for esophageal cancer: evaluation from a nationwide database                                                                                                                                                          | 2018 | Yasuo Hamamoto      | DPC | Surgery            |

|     |                                                                                                                                                                                                               |      |                     |     |                           |
|-----|---------------------------------------------------------------------------------------------------------------------------------------------------------------------------------------------------------------|------|---------------------|-----|---------------------------|
| 302 | Association Between Dose of Glucocorticoids and Coronary Artery Lesions in Kawasaki Disease                                                                                                                   | 2018 | Yusuke Okubo        | DPC | Pediatrics                |
| 303 | Recent trends in practice patterns and comparisons between immunoglobulin and corticosteroid in pediatric immune thrombocytopenia                                                                             | 2018 | Yusuke Okubo        | DPC | Pediatrics                |
| 304 | Efficacy of Antimicrobial Catheters for Prevention of Catheter-Associated Urinary Tract Infection in Acute Cerebral Infarction                                                                                | 2018 | Keiji Muramatsu     | DPC | General medicine          |
| 305 | The Current Status of Microvascular Decompression for the Treatment of Trigeminal Neuralgia in Japan: An Analysis of 1619 Patients Using the Japanese Diagnosis Procedure Combination Database                | 2018 | Yoshifumi Mizobuchi | DPC | Neurosurgery              |
| 306 | Donepezil is associated with decreased in-hospital mortality as a result of pneumonia among older patients with dementia: A retrospective cohort study                                                        | 2018 | Yasuko Abe          | DPC | Internal medicine         |
| 307 | Incidence rate and patient characteristics of severe hypoglycemia in treated type 2 diabetes mellitus patients in Japan: Retrospective Diagnosis Procedure Combination database analysis                      | 2018 | Yuika Ikeda         | DPC | Internal medicine         |
| 308 | Dose-response relationship between weight status and clinical outcomes in pediatric influenza-related respiratory infections                                                                                  | 2018 | Yusuke Okubo        | DPC | Pediatrics                |
| 309 | Recent trends in practice patterns and impact of corticosteroid use on pediatric Mycoplasma pneumoniae-related respiratory infections                                                                         | 2018 | Yusuke Okubo        | DPC | Pediatrics                |
| 310 | Dose-dependent relationships between weight status and clinical outcomes among infants hospitalized with respiratory syncytial virus infections                                                               | 2018 | Yusuke Okubo        | DPC | Pediatrics                |
| 311 | The relationship between high-dose corticosteroid treatment and mortality in acute respiratory distress syndrome: a retrospective and observational study using a nationwide administrative database in Japan | 2018 | Takashi Kido        | DPC | Internal medicine         |
| 312 | Comparison of In-hospital Outcomes Between Transcatheter and Surgical Aortic Valve Replacement in Patients with Aortic Valve Stenosis: A Retrospective Cohort Study Using Administrative Data                 | 2018 | Takeshi Umegaki     | DPC | Surgery                   |
| 313 | Short-Term Outcomes following Hepatectomy in Elderly Patients with Hepatocellular Carcinoma: An Analysis of 10,805 Septuagenarians and 2,381 Octo- and Nonagenarians in Japan                                 | 2018 | Hiroko Okinaga      | DPC | Surgery                   |
| 314 | In-hospital complication rate following microendoscopic versus open lumbar laminectomy: a propensity score-matched analysis                                                                                   | 2018 | Takeshi Oichi       | DPC | Orthopedics               |
| 315 | Early enteral nutrition for cardiogenic or obstructive shock requiring venoarterial extracorporeal membrane oxygenation: a nationwide inpatient database study                                                | 2018 | Hiroyuki Ohbe       | DPC | Emergency medicine        |
| 316 | Cholinergic Crisis Caused by Cholinesterase Inhibitors: a Retrospective Nationwide Database Study                                                                                                             | 2018 | Hiroyuki Ohbe       | DPC | Emergency medicine        |
| 317 | Tension-free vaginal mesh surgery versus laparoscopic sacrocolpopexy for pelvic organ prolapse: Analysis of perioperative outcomes using a Japanese national inpatient database                               | 2018 | Daisuke Obinata     | DPC | Obstetrics and gynecology |
| 318 | Clinical features and outcomes of tetanus: Analysis using a National Inpatient Database in Japan                                                                                                              | 2018 | Mikio Nakajima      | DPC | Emergency medicine        |
| 319 | Respiratory comorbidities and risk of mortality in hospitalized patients with idiopathic pulmonary fibrosis                                                                                                   | 2018 | Keishi Oda          | DPC | Internal medicine         |
| 320 | Effects of night-time and weekend admissions on in-hospital mortality in acute myocardial infarction patients in Japan                                                                                        | 2018 | Seiko Mizuno        | DPC | Internal medicine         |

|     |                                                                                                                                                                                                                |      |                     |     |                           |
|-----|----------------------------------------------------------------------------------------------------------------------------------------------------------------------------------------------------------------|------|---------------------|-----|---------------------------|
| 321 | Early prophylactic antibiotics for severe acute pancreatitis: A population-based cohort study using a nationwide database in Japan                                                                             | 2018 | Kazuhiro Nakaharai  | DPC | Surgery                   |
| 322 | Therapeutic endoscopy-related GI bleeding and thromboembolic events in patients using warfarin or direct oral anticoagulants: results from a large nationwide database analysis                                | 2018 | Naoyoshi Nagata     | DPC | Internal medicine         |
| 323 | Venous thromboembolic events in patients with lung cancer treated with cisplatin-based versus carboplatin/nedaplatin-based chemotherapy                                                                        | 2018 | Akihisa Mitani      | DPC | Internal medicine         |
| 324 | Safety of Tranexamic Acid During Pediatric Trauma: A Nationwide Database Study                                                                                                                                 | 2018 | Takuma Maeda        | DPC | Pediatrics                |
| 325 | In-Hospital Mortality for Hepatic Portal Venous Gas: Analysis of 1590 Patients Using a Japanese National Inpatient Database                                                                                    | 2018 | Chie Koizumi        | DPC | Surgery                   |
| 326 | Impact of Drain Insertion After Perforated Peptic Ulcer Repair in a Japanese Nationwide Database Analysis                                                                                                      | 2018 | Koichi Okumura      | DPC | Surgery                   |
| 327 | Suspected periprosthetic joint infection after total knee arthroplasty under propofol versus sevoflurane anesthesia: a retrospective cohort study                                                              | 2018 | Miwa Kishimoto      | DPC | Anesthesiology            |
| 328 | Hospital-Volume Effects on Perioperative Outcomes in Peritoneal Dialysis Catheter Implantation: Analysis of 2,505 Cases                                                                                        | 2018 | Yoshitaka Kinoshita | DPC | Internal medicine         |
| 329 | Atopic dermatitis is a novel demographic risk factor for surgical site infection after anterior cruciate ligament reconstruction                                                                               | 2018 | Manabu Kawata       | DPC | Orthopedics               |
| 330 | Annual trends in arthroscopic meniscus surgery: Analysis of a national database in Japan                                                                                                                       | 2018 | Manabu Kawata       | DPC | Orthopedics               |
| 331 | Influence of Parkinsonism on outcomes of elderly pneumonia patients                                                                                                                                            | 2018 | Taisuke Jo          | DPC | Internal medicine         |
| 332 | Clinical features and peripartum outcomes in pregnant women with cardiac disease: a nationwide retrospective cohort study in Japan                                                                             | 2018 | Toshiaki Isogai     | DPC | Obstetrics and gynecology |
| 333 | Dementia and Risk of 30-Day Readmission in Older Adults After Discharge from Acute Care Hospitals                                                                                                              | 2018 | Nobuo Sakata        | DPC | General medicine          |
| 334 | The three peaks in age distribution of females with pneumothorax: a nationwide database study in Japan                                                                                                         | 2018 | Noriko Hiyama       | DPC | Surgery                   |
| 335 | Variation in Patient Backgrounds, Practice Patterns, and Outcomes of High-Risk Pulmonary Embolism in Japan                                                                                                     | 2018 | Hiraku Funakoshi    | DPC | Surgery                   |
| 336 | Postoperative Small Bowel Obstruction Following Laparoscopic or Open Fundoplication in Children: A Retrospective Analysis Using a Nationwide Database                                                          | 2018 | Michimasa Fujiogi   | DPC | Pediatrics                |
| 337 | Clinical features and practice patterns of gastroschisis: a retrospective analysis using a Japanese national inpatient database                                                                                | 2018 | Michimasa Fujiogi   | DPC | Pediatrics                |
| 338 | Effect of cyclosporine A on mortality after acute exacerbation of idiopathic pulmonary fibrosis                                                                                                                | 2018 | Shotaro Aso         | DPC | Internal medicine         |
| 339 | Association between mode of anaesthesia and severe maternal morbidity during admission for scheduled Caesarean delivery: a nationwide population-based study in Japan, 2010-2013                               | 2018 | Hiroaki Abe         | DPC | Anesthesiology            |
| 340 | Comparing intracerebral hemorrhages associated with direct oral anticoagulants or warfarin                                                                                                                     | 2018 | Ryota Kurogi        | DPC | Neurosurgery              |
| 341 | Preoperative short-term plus postoperative physical therapy versus postoperative physical therapy alone for patients undergoing lung cancer surgery: retrospective analysis of a nationwide inpatient database | 2018 | Kazuaki Uda         | DPC | Rehabilitation            |

|     |                                                                                                                                                                                                                                      |      |                    |     |                           |
|-----|--------------------------------------------------------------------------------------------------------------------------------------------------------------------------------------------------------------------------------------|------|--------------------|-----|---------------------------|
| 342 | Comparison of surgical and conservative treatment outcomes for type a aortic dissection in elderly patients                                                                                                                          | 2018 | Takeshi Aoyama     | DPC | Surgery                   |
| 343 | Reduction in exacerbation of COPD in patients of advanced age using the Japanese Kampo medicine Dai-kenchu-to: a retrospective cohort study                                                                                          | 2018 | Taisuke Jo         | DPC | Internal medicine         |
| 344 | Hospital Volume and Mortality following Diagnostic Bronchoscopy in Lung Cancer Patients: Data from a National Inpatient Database in Japan                                                                                            | 2018 | Yoshihisa Hiraishi | DPC | Internal medicine         |
| 345 | In-hospital mortality associated with transcatheter arterial embolization for treatment of hepatocellular carcinoma in patients on hemodialysis for end stage renal disease: a matched-pair cohort study using a nationwide database | 2019 | Masaya Sato        | DPC | Internal medicine         |
| 346 | Identification of gastrointestinal perforation based on ICD-10 code in a Japanese administrative medical information database and associated drug exposure risk factors                                                              | 2019 | Masatoshi Tanigawa | DPC | Surgery                   |
| 347 | Effect of combination of pre- and postoperative pulmonary rehabilitation on onset of postoperative pneumonia: a retrospective cohort study based on data from the diagnosis procedure combination database in Japan                  | 2019 | Shuhei Fujimoto    | DPC | Rehabilitation            |
| 348 | Association of dialysis with in-hospital disability progression and mortality in community-onset stroke                                                                                                                              | 2019 | Tomoko Usui        | DPC | Neurosurgery              |
| 349 | Intensive In-Hospital Rehabilitation After Hip Fracture Surgery and Activities of Daily Living in Patients With Dementia: Retrospective Analysis of a Nationwide Inpatient Database                                                  | 2019 | Kazuaki Uda        | DPC | Rehabilitation            |
| 350 | Nationwide observational study of mortality from complicated intra-abdominal infections and the role of bacterial cultures                                                                                                           | 2019 | Asuka Tsuchiya     | DPC | Internal medicine         |
| 351 | Azithromycin plus $\beta$ -lactam versus levofloxacin plus $\beta$ -lactam for severe community-acquired pneumonia: A retrospective nationwide database analysis                                                                     | 2019 | Jun Suzuki         | DPC | Internal medicine         |
| 352 | Effect of Inferior Vena Cava Filter on Venous Thromboembolism Mortality in Japan - JROAD and JROAD-DPC Registry Analysis                                                                                                             | 2019 | Yoshiaki Ohyama    | DPC | Internal medicine         |
| 353 | Mortality and morbidity after pancreatoduodenectomy in patients undergoing hemodialysis: Analysis using a national inpatient database                                                                                                | 2019 | Hiroji Shinkawa    | DPC | Surgery                   |
| 354 | Inappropriate use of ritodrine hydrochloride for threatened preterm birth in Japan: a retrospective cohort study using a national inpatient database                                                                                 | 2019 | Daisuke Shigemi    | DPC | Obstetrics and gynecology |
| 355 | Laparoscopic Compared With Open Surgery for Severe Pelvic Inflammatory Disease and Tubo-Ovarian Abscess                                                                                                                              | 2019 | Daisuke Shigemi    | DPC | Obstetrics and gynecology |
| 356 | Therapeutic Impact of Initial Treatment for Chlamydia trachomatis Among Patients With Pelvic Inflammatory Disease: A Retrospective Cohort Study Using a National Inpatient Database in Japan                                         | 2019 | Daisuke Shigemi    | DPC | Obstetrics and gynecology |
| 357 | Safety of Laparoscopic Surgery for Benign Diseases during Pregnancy: A Nationwide Retrospective Cohort Study                                                                                                                         | 2019 | Daisuke Shigemi    | DPC | Obstetrics and gynecology |
| 358 | Antenatal corticosteroid administration in women undergoing tocolytic treatment who delivered before 34 weeks of gestation: a retrospective cohort study using a national inpatient database                                         | 2019 | Daisuke Shigemi    | DPC | Obstetrics and gynecology |
| 359 | Age distribution and seasonality in acute eosinophilic pneumonia: analysis using a national inpatient database                                                                                                                       | 2019 | Koshi Ota          | DPC | Internal medicine         |
| 360 | Association of intensive care unit admission and mortality in patients with acute myocardial infarction                                                                                                                              | 2019 | Ryusuke Miki       | DPC | Emergency medicine        |

|     |                                                                                                                                                                                                                                                    |      |                    |     |                           |
|-----|----------------------------------------------------------------------------------------------------------------------------------------------------------------------------------------------------------------------------------------------------|------|--------------------|-----|---------------------------|
| 361 | Recent practice patterns in diagnostic procedures anticonvulsants, and antibiotics for children hospitalized with febrile seizure                                                                                                                  | 2019 | Yusuke Okubo       | DPC | Pediatrics                |
| 362 | Risk factors for early unplanned readmission in patients with bipolar disorder: A retrospective observational study                                                                                                                                | 2019 | Daisuke Shinjo     | DPC | Psychiatry                |
| 363 | Can Elective Spine Surgery Be Performed Safely Among Nonagenarians?: Analysis of a National Inpatient Database in Japan                                                                                                                            | 2019 | Takeshi Oichi      | DPC | Orthopedics               |
| 364 | Perioperative complications of anterior decompression with fusion versus laminoplasty for the treatment of cervical ossification of the posterior longitudinal ligament: propensity score matching analysis using a nation-wide inpatient database | 2019 | Shingo Morishita   | DPC | Orthopedics               |
| 365 | Scholarly Activity Support Systems in Internal Medicine Residency Programs: A National Representative Survey in Japan                                                                                                                              | 2019 | Yuki Kataoka       | DPC | Internal medicine         |
| 366 | Hospitalization Costs for Patients With Acute Congestive Heart Failure in Japan                                                                                                                                                                    | 2019 | Koshiro Kanaoka    | DPC | Internal medicine         |
| 367 | Physician-manned prehospital emergency care in tertiary emergency centers in Japan                                                                                                                                                                 | 2019 | Hiroyuki Ohbe      | DPC | Emergency medicine        |
| 368 | Effects of preoperative oral management by dentists on postoperative outcomes following esophagectomy: Multilevel propensity score matching and weighting analyses using the Japanese inpatient database                                           | 2019 | Jung-Ho Shin       | DPC | Surgery                   |
| 369 | Extracorporeal membrane oxygenation improves outcomes of accidental hypothermia without vital signs: A nationwide observational study                                                                                                              | 2019 | Hiroyuki Ohbe      | DPC | Emergency medicine        |
| 370 | Treatment with Antithrombin or Thrombomodulin and Mortality from Heatstroke-Induced Disseminated Intravascular Coagulation: A Nationwide Observational Study                                                                                       | 2019 | Hiroyuki Ohbe      | DPC | Emergency medicine        |
| 371 | Early Enteral Nutrition in Patients Undergoing Sustained Neuromuscular Blockade: A Propensity-Matched Analysis Using a Nationwide Inpatient Database                                                                                               | 2019 | Hiroyuki Ohbe      | DPC | Emergency medicine        |
| 372 | Effect of high-dose vitamin C therapy on severe burn patients: a nationwide cohort study                                                                                                                                                           | 2019 | Mikio Nakajima     | DPC | Emergency medicine        |
| 373 | Association between the number of board-certified cardiologists and the risk of in-hospital mortality: a nationwide study involving the Japanese registry of all cardiac and vascular diseases                                                     | 2019 | Kihei Yoneyama     | DPC | Internal medicine         |
| 374 | Disaster-related carbon monoxide poisoning after the Great East Japan Earthquake, 2011: a nationwide observational study                                                                                                                           | 2019 | Mikio Nakajima     | DPC | Emergency medicine        |
| 375 | Association of Early Systemic Corticosteroid Therapy with Mortality in Patients with Stevens-Johnson Syndrome or Toxic Epidermal Necrolysis: A Retrospective Cohort Study Using a Nationwide Claims Database                                       | 2019 | Kojiro Morita      | DPC | Dermatology               |
| 376 | Temporal change in characteristics and outcomes of acute kidney injury on renal replacement therapy in intensive care units: analysis of a nationwide administrative database in Japan, 2007-2016                                                  | 2019 | Yoshihisa Miyamoto | DPC | Emergency medicine        |
| 377 | Association between intravenous contrast media exposure and non-recovery from dialysis-requiring septic acute kidney injury: a nationwide observational study                                                                                      | 2019 | Yoshihisa Miyamoto | DPC | Emergency medicine        |
| 378 | Artificial colloids versus human albumin for the treatment of ovarian hyperstimulation syndrome: A retrospective cohort study                                                                                                                      | 2019 | Tetsuji Minami     | DPC | Obstetrics and gynecology |



|     |                                                                                                                                                                                                                                                      |      |                    |     |                    |
|-----|------------------------------------------------------------------------------------------------------------------------------------------------------------------------------------------------------------------------------------------------------|------|--------------------|-----|--------------------|
| 379 | Impact of Board-Certified Cardiologist Characteristics on Risk of In-Hospital Mortality                                                                                                                                                              | 2019 | Mika Watanabe      | DPC | Internal medicine  |
| 380 | Association between Angiotensin-Converting Enzyme Inhibitors and Post-Stroke Aspiration Pneumonia                                                                                                                                                    | 2019 | Ryosuke Kumazawa   | DPC | Neurosurgery       |
| 381 | Large hospital variation in the utilization of Post-procedural CT to detect pulmonary embolism/Deep Vein Thrombosis in Patients Undergoing Total Knee or Hip Replacement Surgery: Japanese Nationwide Diagnosis Procedure Combination Database Study | 2019 | Kanako K Kumamaru  | DPC | Orthopedics        |
| 382 | Characteristics, treatments, and outcomes among patients with abdominal aortic injury in Japan: a nationwide cohort study                                                                                                                            | 2019 | Yutaka Kondo       | DPC | Surgery            |
| 383 | Analysis of concordance with antiemetic guidelines in pediatric, adolescent, and young adult patients with cancer using a large-scale administrative database                                                                                        | 2019 | Seiko Bun          | DPC | Pediatrics         |
| 384 | Number of Cardiologists per Cardiovascular Beds and In-Hospital Mortality for Acute Heart Failure: A Nationwide Study in Japan                                                                                                                       | 2019 | Koshiro Kanaoka    | DPC | Internal medicine  |
| 385 | Tranexamic acid and post-tonsillectomy hemorrhage: propensity score and instrumental variable analyses                                                                                                                                               | 2019 | Megumi Koizumi     | DPC | Otolaryngology     |
| 386 | Effect of tranexamic acid on mortality in patients with haemoptysis: a nationwide study                                                                                                                                                              | 2019 | Takahiro Kinoshita | DPC | Emergency medicine |
| 387 | Patient characteristics and in-hospital complications of subcutaneous implantable cardioverter-defibrillator for Brugada syndrome in Japan                                                                                                           | 2019 | Iwanari Kawamura   | DPC | Internal medicine  |
| 388 | Volume effect in paediatric brain tumour resection surgery: analysis of data from the Japanese national inpatient database                                                                                                                           | 2019 | Daisuke Shinjo     | DPC | Neurosurgery       |
| 389 | Characteristics of Patients with Diabetes Initiating Sodium Glucose Co-transporter-2 Inhibitors (SGLT2i): Real-World Results from Three Administrative Databases in Japan                                                                            | 2019 | Yuichiro Ito       | DPC | Internal medicine  |
| 390 | Volume-outcome relationship on survival and cost benefits in severe burn injury: a retrospective analysis of a Japanese nationwide administrative database                                                                                           | 2019 | Akira Endo         | DPC | Emergency medicine |
| 391 | Clinical Effects of Early Edaravone Use in Acute Ischemic Stroke Patients Treated by Endovascular Reperfusion Therapy                                                                                                                                | 2019 | Masaya Enomoto     | DPC | Neurosurgery       |
| 392 | In-hospital Takotsubo syndrome versus in-hospital acute myocardial infarction among patients admitted for non-cardiac diseases: a nationwide inpatient database study                                                                                | 2019 | Toshiaki Isogai    | DPC | Internal medicine  |
| 393 | Impact of congenital heart disease on outcomes after primary repair of esophageal atresia: a retrospective observational study using a nationwide database in Japan                                                                                  | 2019 | Tetsuya Ishimaru   | DPC | Pediatrics         |
| 394 | Machine Learning-Based Prediction Models for 30-Day Readmission after Hospitalization for Chronic Obstructive Pulmonary Disease                                                                                                                      | 2019 | Tadahiro Goto      | DPC | Internal medicine  |
| 395 | Early Outcomes of Laparoscopic Versus Open Surgery for Urachal Remnant Resection in Children: A Retrospective Analysis Using a Nationwide Inpatient Database in Japan                                                                                | 2019 | Michimasa Fujiogi  | DPC | Pediatrics         |
| 396 | Volume-outcome relationship in severe operative trauma surgery: A retrospective cohort study using a Japanese nationwide administrative database                                                                                                     | 2019 | Hideki Endo        | DPC | Surgery            |
| 397 | Outcomes following laparoscopic versus open surgery for pediatric inguinal hernia repair: Analysis using a national inpatient database in Japan                                                                                                      | 2019 | Michimasa Fujiogi  | DPC | Pediatrics         |
| 398 | Systemic glucocorticoids plus cyclophosphamide for acute exacerbation of idiopathic pulmonary fibrosis: a retrospective nationwide study                                                                                                             | 2019 | Shotaro Aso        | DPC | Internal medicine  |

|     |                                                                                                                                                                                                                                            |      |                  |     |                    |
|-----|--------------------------------------------------------------------------------------------------------------------------------------------------------------------------------------------------------------------------------------------|------|------------------|-----|--------------------|
| 399 | Impact of oral voriconazole during chemotherapy for acute myeloid leukemia and myelodysplastic syndrome: a Japanese nationwide retrospective cohort study                                                                                  | 2019 | Ikuyo Tsutsumi   | DPC | Internal medicine  |
| 400 | Previously-initiated hemodialysis as prognostic factor for in-hospital mortality in pneumonia patients with stage 5 chronic kidney disease: Retrospective database study of Japanese hospitals                                             | 2019 | Daisuke Takada   | DPC | Internal medicine  |
| 401 | Impact of Body Mass Index of Japanese Gallbladder Cancer Patients on their Postoperative Outcomes                                                                                                                                          | 2019 | Masakuni Fujii   | DPC | Urology            |
| 402 | The Influence of Age on the Outcomes of Traumatic Brain Injury: Findings from a Japanese Nationwide Survey (J-ASPECT Study-Traumatic Brain Injury)                                                                                         | 2019 | Keitaro Yamagami | DPC | Neurosurgery       |
| 403 | Treatment Risk for Elderly Patients with Unruptured Cerebral Aneurysm from a Nationwide Database in Japan                                                                                                                                  | 2019 | Fusao Ikawa      | DPC | Neurosurgery       |
| 404 | Incidence and In-Hospital Mortality of Neonatal Disseminated Intravascular Coagulation in Japan: An Observational Study of a Nationwide Hospital Claims Database                                                                           | 2019 | Shunsuke Araki   | DPC | Pediatrics         |
| 405 | National trends in outcomes of ischemic stroke and prognostic influence of stroke center capability in Japan, 2010-2016                                                                                                                    | 2019 | Akiko Kada       | DPC | Neurosurgery       |
| 406 | Trends in hospital standardized mortality ratios for stroke in Japan between 2012 and 2016: a retrospective observational study                                                                                                            | 2019 | Rebeka Amin      | DPC | Neurosurgery       |
| 407 | Structure and process of dementia care and patient outcomes after hip surgery in elderly people with dementia: A retrospective observational study in Japan                                                                                | 2020 | Noriko Morioka   | DPC | Orthopedics        |
| 408 | The off-hour effect in severe trauma and the structure of care delivery among Japanese emergency and critical care centers: A retrospective cohort study                                                                                   | 2020 | Hideki Endo      | DPC | Emergency medicine |
| 409 | Effect of Early Tracheostomy on Mortality of Mechanically Ventilated Patients with Guillain-Barré Syndrome: A Nationwide Observational Study                                                                                               | 2020 | Naoki Yonezawa   | DPC | Internal medicine  |
| 410 | Developing and validating a multivariable prediction model for in-hospital mortality of pneumonia with advanced chronic kidney disease patients: a retrospective analysis using a nationwide database in Japan                             | 2020 | Daisuke Takada   | DPC | Internal medicine  |
| 411 | Periprocedural hypotension after conscious sedation versus local anesthesia during defibrillator implantation for left ventricular dysfunction: analysis of a national inpatient database in Japan                                         | 2020 | Yusuke Ugata     | DPC | Internal medicine  |
| 412 | Antithrombin use and mortality in patients with stage IV solid tumor-associated disseminated intravascular coagulation: a nationwide observational study in Japan                                                                          | 2020 | Kohei Taniguchi  | DPC | Internal medicine  |
| 413 | Proportion and risk factors of cholesterol crystal embolization after cardiovascular procedures: a retrospective national database study                                                                                                   | 2020 | Hiroyuki Tanaka  | DPC | Internal medicine  |
| 414 | Vasodilator Therapy and Mortality in Nonocclusive Mesenteric Ischemia: A Nationwide Observational Study                                                                                                                                    | 2020 | Toru Takiguchi   | DPC | Surgery            |
| 415 | High-dose versus low-dose intravenous immunoglobulin for treatment of children with Kawasaki disease weighing 25 kg or more                                                                                                                | 2020 | Takanori Suzuki  | DPC | Pediatrics         |
| 416 | Recombinant Human Soluble Thrombomodulin Contributes to a Reduction In-Hospital Mortality of Acute Cholangitis with Disseminated Intravascular Coagulation: A Propensity Score Analyses of a Japanese Nationwide Database                  | 2020 | Kunio Tarasawa   | DPC | Emergency medicine |
| 417 | The effect of antithrombin added to recombinant human-soluble thrombomodulin for severe community-acquired pneumonia-associated disseminated intravascular coagulation: a retrospective cohort study using a nationwide inpatient database | 2020 | Jun Suzuki       | DPC | Emergency medicine |

|     |                                                                                                                                                                                                                                       |      |                  |     |                    |
|-----|---------------------------------------------------------------------------------------------------------------------------------------------------------------------------------------------------------------------------------------|------|------------------|-----|--------------------|
| 418 | Histamine-2 receptor antagonists versus proton pump inhibitors for septic shock after lower gastrointestinal tract perforation: a retrospective cohort study using a national inpatient database                                      | 2020 | Jun Suzuki       | DPC | Emergency medicine |
| 419 | Recent epidemiology of Pneumocystis pneumonia in Japan                                                                                                                                                                                | 2020 | Kensuke Shoji    | DPC | Internal medicine  |
| 420 | Mortality and morbidity following postoperative use of short-term, low-dose quetiapine vs risperidone in patients with diabetes: Analysis using a national inpatient database                                                         | 2020 | Daisuke Sato     | DPC | Surgery            |
| 421 | Stent as a bridge to surgery or immediate colectomy for malignant right colonic obstruction: propensity-scored, national database study                                                                                               | 2020 | Takashi Sakamoto | DPC | Surgery            |
| 422 | Clinical features and outcomes of nonocclusive mesenteric ischemia after cardiac surgery: a retrospective cohort study                                                                                                                | 2020 | Takashi Sakamoto | DPC | Surgery            |
| 423 | Timing of cholecystectomy after percutaneous transhepatic gallbladder drainage for acute cholecystitis: a nationwide inpatient database study                                                                                         | 2020 | Takashi Sakamoto | DPC | Surgery            |
| 424 | Characteristics and in-hospital mortality of patients with myocardial infarction in the absence of obstructive coronary artery disease in super-aging society                                                                         | 2020 | Masanobu Ishii   | DPC | Internal medicine  |
| 425 | Short-Term Outcomes of Laparoscopic and Open Total Gastrectomy for Gastric Cancer: A Nationwide Retrospective Cohort Analysis                                                                                                         | 2020 | Takashi Sakamoto | DPC | Surgery            |
| 426 | Comparison of Perioperative Complications Between Anterior Decompression With Fusion and Laminoplasty For Cervical Spondylotic Myelopathy: Propensity Score-matching Analysis Using Japanese Diagnosis Procedure Combination Database | 2020 | Shingo Morishita | DPC | Orthopedics        |
| 427 | Impact of facilities accredited by both adult and pediatric cardiology societies on the outcome of patients with adult congenital heart disease                                                                                       | 2020 | Atsushi Mizuno   | DPC | Internal medicine  |
| 428 | Early Versus Late Rib Fixation in Patients With Traumatic Rib Fractures: A Nationwide Study                                                                                                                                           | 2020 | Shunichi Otaka   | DPC | Surgery            |
| 429 | National trends in appropriate antibiotics use among pediatric inpatients with uncomplicated lower respiratory tract infections in Japan                                                                                              | 2020 | Yusuke Okubo     | DPC | Pediatrics         |
| 430 | The Impact of Changes in Clinical Guideline on Practice Patterns and Healthcare Utilizations for Kawasaki Disease in Japan                                                                                                            | 2020 | Yusuke Okubo     | DPC | Pediatrics         |
| 431 | Effect of treatment modality and cerebral vasospasm agent on patient outcomes after aneurysmal subarachnoid hemorrhage in the elderly aged 75 years and older                                                                         | 2020 | Keisuke Ido      | DPC | Neurosurgery       |
| 432 | Outcomes of lactulose plus branched-chain amino acid infusion and lactulose alone for hepatic encephalopathy: A retrospective cohort study using a national inpatient database                                                        | 2020 | Akira Okada      | DPC | Internal medicine  |
| 433 | Short-term exposure to desert dust and the risk of acute myocardial infarction in Japan: a time-stratified case-crossover study                                                                                                       | 2020 | Masanobu Ishii   | DPC | Internal medicine  |
| 434 | Extracorporeal cardiopulmonary resuscitation for acute aortic dissection during cardiac arrest: A nationwide retrospective observational study                                                                                        | 2020 | Hiroyuki Ohbe    | DPC | Emergency medicine |
| 435 | Early enteral nutrition in patients with severe traumatic brain injury: a propensity score-matched analysis using a nationwide inpatient database in Japan                                                                            | 2020 | Hiroyuki Ohbe    | DPC | Neurosurgery       |
| 436 | Differences in effect of early enteral nutrition on mortality among ventilated adults with shock requiring low-, medium-, and high-dose noradrenaline: A propensity-matched analysis                                                  | 2020 | Hiroyuki Ohbe    | DPC | Emergency medicine |
| 437 | Phenytoin versus fosphenytoin for second-line treatment of status epilepticus: propensity score matching analysis using a nationwide inpatient database                                                                               | 2020 | Kensuke Nakamura | DPC | Internal medicine  |

|     |                                                                                                                                                                                                                         |      |                    |     |                    |
|-----|-------------------------------------------------------------------------------------------------------------------------------------------------------------------------------------------------------------------------|------|--------------------|-----|--------------------|
| 438 | Changes in Real-world Practice Patterns of Antiepileptic Drugs for Status Epilepticus: A Nationwide Observational Study in Japan                                                                                        | 2020 | Kensuke Nakamura   | DPC | Internal medicine  |
| 439 | Levetiracetam vs. Fosphenytoin for Second-Line Treatment of Status Epilepticus: Propensity Score Matching Analysis Using a Nationwide Inpatient Database                                                                | 2020 | Kensuke Nakamura   | DPC | Internal medicine  |
| 440 | Early administration of glucocorticoid for thyroid storm: analysis of a national administrative database                                                                                                                | 2020 | Atsushi Senda      | DPC | Internal medicine  |
| 441 | Clinical Outcomes of Laparoscopic Versus Laparotomic Distal Gastrectomy in Gastric Cancer Patients: A Multilevel Analysis Based on a Nationwide Administrative Database in Japan                                        | 2020 | Kazunori Shibao    | DPC | Surgery            |
| 442 | Prevalence of myocardial injury requiring percutaneous coronary intervention after acute carbon monoxide poisoning                                                                                                      | 2020 | Mikio Nakajima     | DPC | Emergency medicine |
| 443 | Hyperbaric oxygen therapy and mortality from carbon monoxide poisoning: A nationwide observational study                                                                                                                | 2020 | Mikio Nakajima     | DPC | Emergency medicine |
| 444 | Effectiveness of regional clinical pathways on postoperative length of stay for hip fracture patients: A retrospective observational study using the Japanese Diagnosis Procedure Combination database                  | 2020 | Yuko Mine          | DPC | Orthopedics        |
| 445 | Effect of Sugammadex on Postoperative Myasthenic Crisis in Myasthenia Gravis Patients: Propensity Score Analysis of a Japanese Nationwide Database                                                                      | 2020 | Hideyuki Mouri     | DPC | Anesthesiology     |
| 446 | Impact of glucocorticoid supplementation on reducing perioperative complications in patients on long-term glucocorticoid medication: A propensity score analysis using a nationwide inpatient database                  | 2020 | Hideyuki Mouri     | DPC | Surgery            |
| 447 | Association between clinic physician workforce and avoidable readmission: a retrospective database research                                                                                                             | 2020 | Yoshito Hirota     | DPC | Emergency medicine |
| 448 | Epidemiology and volume-outcome relationship of extracorporeal membrane oxygenation for respiratory failure in Japan: A retrospective observational study using a national administrative database                      | 2020 | Kohei Muguruma     | DPC | Emergency medicine |
| 449 | Association Between IV Thiamine and Mortality in Patients With Septic Shock: A Nationwide Observational Study                                                                                                           | 2020 | Yoshihisa Miyamoto | DPC | Emergency medicine |
| 450 | Role of climatic factors in the incidence of Takotsubo syndrome: A nationwide study from 2012 to 2016                                                                                                                   | 2020 | Koshiro Kanaoka    | DPC | Internal medicine  |
| 451 | The Effect of Carbazochrome Sodium Sulfonate in Patients with Colonic Diverticular Bleeding: Propensity Score Matching Analyses Using a Nationwide Inpatient Database                                                   | 2020 | Yuki Miyamoto      | DPC | Internal medicine  |
| 452 | Open colectomy vs. laparoscopic colectomy in Japan: a retrospective study using real-world data from the diagnosis procedure combination database                                                                       | 2020 | Takehide Tajima    | DPC | Surgery            |
| 453 | Comparison of Perioperative Complications Between Anterior Fusion and Posterior Fusion for Osteoporotic Vertebral Fractures in Elderly Patients: Propensity Score-Matching Analysis Using Nationwide Inpatient Database | 2020 | Shingo Morishita   | DPC | Orthopedics        |
| 454 | Treatment pattern and outcome of spontaneous coronary artery dissection in Japan                                                                                                                                        | 2020 | Taku Inohara       | DPC | Internal medicine  |
| 455 | Angiography versus colonoscopy in patients with severe lower gastrointestinal bleeding: a nationwide observational study                                                                                                | 2020 | Yasuhiko Miyakuni  | DPC | Internal medicine  |
| 456 | Postoperative Outcomes after Tubeless, Totally Tubeless, Standard, and Standard with Ureteral Stent Percutaneous Nephrolithotomy: A Nationwide Retrospective Study in Japan                                             | 2020 | Tetsuji Minami     | DPC | Urology            |

|     |                                                                                                                                                                                                                  |      |                        |     |                    |
|-----|------------------------------------------------------------------------------------------------------------------------------------------------------------------------------------------------------------------|------|------------------------|-----|--------------------|
| 457 | Association between Hemiarthroplasty vs Total Hip Arthroplasty and Major Surgical Complications among Patients with Femoral Neck Fracture                                                                        | 2020 | Takahisa Ogawa         | DPC | Orthopedics        |
| 458 | Feasibility of management of hemodynamically stable patients with acute myocardial infarction following primary percutaneous coronary intervention in the general ward settings                                  | 2020 | Kazuya Tateishi        | DPC | Internal medicine  |
| 459 | Primary prophylaxis with pegfilgrastim in patients with newly-diagnosed diffuse large B-cell lymphoma: propensity score and instrumental variable analyses                                                       | 2020 | Kensuke Matsuda        | DPC | Internal medicine  |
| 460 | New outcome-specific comorbidity scores excelled in predicting in-hospital mortality and healthcare charges in administrative databases                                                                          | 2020 | Jung-Ho Shin           | DPC | Internal medicine  |
| 461 | Incidences and risk factors for post--dural puncture headache after neuraxial anaesthesia: A national inpatient database study in Japan                                                                          | 2020 | Kanako Makito          | DPC | Anesthesiology     |
| 462 | Volatile versus Total Intravenous Anesthesia for Cancer Prognosis in Patients Having Digestive Cancer Surgery                                                                                                    | 2020 | Kanako Makito          | DPC | Anesthesiology     |
| 463 | Effects of Prophylactic Antibiotics on Length of Stay and Total Costs for Pediatric Acute Pancreatitis: A Nationwide Database Study in Japan                                                                     | 2020 | Kayo Ikeda Kurakawa    | DPC | Pediatrics         |
| 464 | Risk factors related to perioperative systemic complications and mortality in elderly patients with osteoporotic vertebral fractures-analysis of a large national inpatient database                             | 2020 | Shingo Morishita       | DPC | Orthopedics        |
| 465 | Treatments and outcomes of encapsulating peritoneal sclerosis in patients undergoing peritoneal dialysis: 295 cases from a nationwide inpatient database in Japan                                                | 2020 | Takaaki Konishi        | DPC | Internal medicine  |
| 466 | Comparison of outcomes after differentiated thyroid cancer surgery performed with and without energy devices: A population-based cohort study using a nationwide database in Japan                               | 2020 | Takaaki Konishi        | DPC | Surgery            |
| 467 | Proton pump inhibitors versus histamine-2 receptor antagonists for stress ulcer prophylaxis during extracorporeal membrane oxygenation: a propensity score-matched analysis                                      | 2020 | Yutaka Kondo           | DPC | Emergency medicine |
| 468 | Trends in complications after functional endoscopic sinus surgery in Japan: A comparison with a previous study (2007-2013vs. 2013-2017)                                                                          | 2020 | Megumi Koizumi         | DPC | Otolaryngology     |
| 469 | Patient characteristics, procedure details including catheter devices, and complications of catheter ablation for ventricular tachycardia: a nationwide observational study                                      | 2020 | Takeshi Kitamura       | DPC | Internal medicine  |
| 470 | Outcomes of paediatric out-of-hospital cardiac arrest according to hospital characteristic defined by the annual number of paediatric patients with invasive mechanical ventilation: A nationwide study in Japan | 2020 | Takahiro Kido          | DPC | Emergency medicine |
| 471 | Association between the number of hospital admissions and in-hospital outcomes in patients with heart failure                                                                                                    | 2020 | Hidehiro Kaneko        | DPC | Internal medicine  |
| 472 | Association between variations in the number of hospital beds and inpatient chemo/radiotherapy for breast cancer: a study using a large claim database                                                           | 2020 | Haruki Harry Matsumoto | DPC | Surgery            |
| 473 | Association of Cancer With Outcomes in Patients Hospitalized for Heart Failure                                                                                                                                   | 2020 | Hidehiro Kaneko        | DPC | Internal medicine  |
| 474 | Characteristics and Outcomes of Super-Elderly Patients (Aged $\geq 90$ Years) Hospitalized for Heart Failure - Analysis of a Nationwide Inpatient Database                                                       | 2020 | Hidehiro Kaneko        | DPC | Internal medicine  |
| 475 | Inhaled corticosteroid withdrawal may improve outcomes in elderly patients with COPD exacerbation: a nationwide database study                                                                                   | 2020 | Taisuke Jo             | DPC | Internal medicine  |
| 476 | Serial Changes in Clinical Presentations and Outcomes of 5,740 Patients Requiring Repeated Hospital Admissions (Four or More Times) due to Worsened Heart Failure                                                | 2020 | Hidetaka Itoh          | DPC | Internal medicine  |

|     |                                                                                                                                                                                                                                                                     |      |                  |     |                    |
|-----|---------------------------------------------------------------------------------------------------------------------------------------------------------------------------------------------------------------------------------------------------------------------|------|------------------|-----|--------------------|
| 477 | Risk Management of Aneurysmal Subarachnoid Hemorrhage by Age and Treatment Method from a Nationwide Database in Japan                                                                                                                                               | 2020 | Fusao Ikawa      | DPC | Neurosurgery       |
| 478 | Propensity Score Matching Analysis for the Patients of Unruptured Cerebral Aneurysm from a Post Hoc Analysis of a Nationwide Database in Japan                                                                                                                      | 2020 | Fusao Ikawa      | DPC | Neurosurgery       |
| 479 | Mortality and risk assessment for anorexia nervosa in acute-care hospitals: a nationwide administrative database analysis                                                                                                                                           | 2020 | Shunsuke Edakubo | DPC | Psychiatry         |
| 480 | In-hospital mortality and poor outcome after surgical clipping and endovascular coiling for aneurysmal subarachnoid hemorrhage using nationwide databases: a systematic review and meta-analysis                                                                    | 2020 | Fusao Ikawa      | DPC | Neurosurgery       |
| 481 | Association between comprehensive geriatric assessment and short-term outcomes among older adult patients with stroke: A nationwide retrospective cohort study using propensity score and instrumental variable methods                                             | 2020 | Tatsuya Hosoi    | DPC | General medicine   |
| 482 | Outcomes in Elderly Japanese Patients Treated for Aneurysmal Subarachnoid Hemorrhage: A Retrospective Nationwide Study                                                                                                                                              | 2020 | Kohei Hironaka   | DPC | Neurosurgery       |
| 483 | Impact of Hospital Practice Factors on Mortality in Patients Hospitalized for Heart Failure in Japan - An Analysis of a Large Number of Health Records From a Nationwide Claims-Based Database, the JROAD-DPC                                                       | 2020 | Hidetaka Kaku    | DPC | Internal medicine  |
| 484 | Comparing outcomes after peripheral nerve block versus general anesthesia for lower extremity amputation: a nationwide exploratory retrospective cohort study in Japan                                                                                              | 2020 | Hiroaki Abe      | DPC | Anesthesiology     |
| 485 | Clinical Effect of the Acrylonitrile-Co-Methallyl Sulfonate Surface-Treated Membrane as a Cytokine Adsorption Therapy for Sepsis due to Acute Panperitonitis: A Retrospective Cohort Study                                                                          | 2020 | Kentarou Hayashi | DPC | Emergency medicine |
| 486 | Recent treatment patterns and variations for pediatric acute encephalopathy in Japan                                                                                                                                                                                | 2020 | Itaru Hayakawa   | DPC | Pediatrics         |
| 487 | Pituitary surgery's epidemiology using a national inpatient database in Japan                                                                                                                                                                                       | 2020 | Yujiro Hattori   | DPC | Neurosurgery       |
| 488 | Comparison of Perioperative Complications in Anterior Decompression With Fusion and Posterior Decompression With Fusion for Cervical Ossification of the Posterior Longitudinal Ligament: Propensity Score Matching Analysis Using a Nation-Wide Inpatient Database | 2020 | Toshitaka Yoshii | DPC | Orthopedics        |
| 489 | Effects of case volume and comprehensive stroke center capabilities on patient outcomes of clipping and coiling for subarachnoid hemorrhage                                                                                                                         | 2020 | Ryota Kurogi     | DPC | Neurosurgery       |
| 490 | Reoperation rates after Ex-PRESS versus trabeculectomy for primary open-angle or normal-tension glaucoma: a national database study in Japan                                                                                                                        | 2020 | Yohei Hashimoto  | DPC | Ophthalmology      |
| 491 | Nationwide in-hospital mortality following major fractures among hemodialysis patients and the general population: An observational cohort study                                                                                                                    | 2020 | Shintaro Mandai  | DPC | Internal medicine  |
| 492 | Time Trends of the Outcomes and Treatment Options for Disseminated Intravascular Coagulation: A Nationwide Observational Study in Japan                                                                                                                             | 2020 | Kazuma Yamakawa  | DPC | Emergency medicine |
| 493 | Underlying Disorders, Clinical Phenotypes, and Treatment Diversity among Patients with Disseminated Intravascular Coagulation                                                                                                                                       | 2020 | Hiroyuki Ohbe    | DPC | Emergency medicine |
| 494 | Optimal use of biologics with endoscopic balloon dilatation for repeated intestinal strictures in Crohn's disease                                                                                                                                                   | 2020 | Akihito Uda      | DPC | Internal medicine  |

|     |                                                                                                                                                                                                                           |      |                     |     |                           |
|-----|---------------------------------------------------------------------------------------------------------------------------------------------------------------------------------------------------------------------------|------|---------------------|-----|---------------------------|
| 495 | Pneumonia prevention effects of perioperative oral management in approximately 25,000 patients following cancer surgery                                                                                                   | 2020 | Yasuhiro Kurasawa   | DPC | Surgery                   |
| 496 | Impact of Body Mass Index on Outcomes After Breast Cancer Surgery: Nationwide Inpatient Database Study in Japan                                                                                                           | 2020 | Takaaki Konishi     | DPC | Surgery                   |
| 497 | Transcatheter Aortic Valve Implantation and Surgical Aortic Valve Replacement for Aortic Stenosis in Japan - Analysis of a Nationwide Inpatient Database                                                                  | 2020 | Tatsuya Kamon       | DPC | Surgery                   |
| 498 | Current trends and outcomes of extracorporeal cardiopulmonary resuscitation for out-of-hospital cardiac arrest in Japan: A nationwide observational study                                                                 | 2020 | Mikio Nakajima      | DPC | Emergency medicine        |
| 499 | Unicompartmental knee arthroplasty is associated with lower proportions of surgical site infection compared with total knee arthroplasty: A retrospective nationwide database study                                       | 2021 | Ryota Yamagami      | DPC | Orthopedics               |
| 500 | Association between ambulance use and hospitalization costs among heart failure patients                                                                                                                                  | 2021 | Hiroki Yasui        | DPC | Internal medicine         |
| 501 | Suicide attempts during pregnancy and perinatal outcomes                                                                                                                                                                  | 2021 | Daisuke Shigemi     | DPC | Obstetrics and gynecology |
| 502 | Efficacy of urgent colonoscopy for colonic diverticular bleeding: A propensity score-matched analysis using a nationwide database in Japan                                                                                | 2021 | Rintaro Moroi       | DPC | Internal medicine         |
| 503 | Association between prophylactic antibiotic use for transarterial chemoembolization and occurrence of liver abscess: a retrospective cohort study                                                                         | 2021 | Shingo Yoshihara    | DPC | Internal medicine         |
| 504 | Pulmonary disease as a risk factor for transfusion-related acute lung injury                                                                                                                                              | 2021 | Akira Yokoyama      | DPC | Internal medicine         |
| 505 | Early Enteral Nutrition is Related to Decreased In-hospital Mortality and Hospitalization in Patients with Acute Pancreatitis: Data from the Japanese Diagnosis Procedure Combination Database                            | 2021 | Masashi Kusanaga    | DPC | Surgery                   |
| 506 | Early Electroconvulsive Therapy in Patients With Major Depressive Disorder: A Propensity Score-Matched Analysis Using a Nationwide Inpatient Database in Japan                                                            | 2021 | Ryuichi Yamazaki    | DPC | Psychiatry                |
| 507 | Outcomes After Intensive Rehabilitation for Mechanically Ventilated Patients: A Nationwide Retrospective Cohort Study                                                                                                     | 2021 | Maiko Yagi          | DPC | Rehabilitation            |
| 508 | Spinal Cord Infarction after Bronchial Artery Embolization for Hemoptysis: A Nationwide Observational Study in Japan                                                                                                      | 2021 | Hideo Ishikawa      | DPC | Radiology                 |
| 509 | Preoperative use of pirfenidone and reduced risk of postoperative severe respiratory complications in patients with idiopathic pulmonary fibrosis: Propensity score-matched analysis using a nationwide database in Japan | 2021 | Hirokazu Urushiyama | DPC | Surgery                   |
| 510 | Prevention of delayed bleeding with vonoprazan in upper gastrointestinal endoscopic treatment                                                                                                                             | 2021 | Hiroko Abe          | DPC | Internal medicine         |
| 511 | Interrupted time-series analyses of routine vaccination program for elderly pneumonia patients in Japan; an ecological study using aggregated nationwide inpatient data                                                   | 2021 | Koichi Kobayashi    | DPC | Internal medicine         |
| 512 | Effects of polymyxin B hemoperfusion in patients with sepsis requiring continuous hemodiafiltration: Analysis of a nationwide administrative database in Japan                                                            | 2021 | Kenji Fujimori      | DPC | Emergency medicine        |
| 513 | Dementia and patient outcomes after hip surgery in older patients: A retrospective observational study using nationwide administrative data in Japan                                                                      | 2021 | Noriko Morioka      | DPC | Orthopedics               |
| 514 | Recombinant Thrombomodulin in Disseminated Intravascular Coagulation Associated with Stage IV Solid Tumors: A Nationwide Observational Study in Japan                                                                     | 2021 | Kohei Taniguchi     | DPC | Emergency medicine        |
| 515 | Factors affecting in-hospital mortality of non-tuberculous mycobacterial pulmonary disease                                                                                                                                | 2021 | Goh Tanaka          | DPC | Internal medicine         |

|     |                                                                                                                                                                                                         |      |                  |     |                           |
|-----|---------------------------------------------------------------------------------------------------------------------------------------------------------------------------------------------------------|------|------------------|-----|---------------------------|
| 516 | Efficacy of extracorporeal membrane oxygenation for acute respiratory failure with interstitial lung disease: a case control nationwide dataset study in Japan                                          | 2021 | Yuko Usagawa     | DPC | Emergency medicine        |
| 517 | Intermittent versus continuous neuromuscular blockade during target temperature management after cardiac arrest: A nationwide observational study                                                       | 2021 | Toru Takiguchi   | DPC | Emergency medicine        |
| 518 | Sodium-containing versus sodium-trace preparations of IVIG for children with Kawasaki disease in the acute phase                                                                                        | 2021 | Takanori Suzuki  | DPC | Pediatrics                |
| 519 | Evaluation of quality indicators near death in older adult cancer decedents in Japan: A nationwide retrospective cohort study                                                                           | 2021 | Sachie Shirane   | DPC | General medicine          |
| 520 | Trends in the incidence and outcome of sepsis using data from a Japanese nationwide medical claims database-the Japan Sepsis Alliance (JaSA) study group                                                | 2021 | Taro Imaeda      | DPC | Emergency medicine        |
| 521 | Semisolid vs Liquid Nutrients and 30-Day Readmission in Gastrostomy Tube-Fed Patients: A Propensity-Matched Analysis                                                                                    | 2021 | Nana Shinozaki   | DPC | General medicine          |
| 522 | Validity of initial cancer diagnoses in the Diagnosis Procedure Combination data in Japan                                                                                                               | 2021 | Daisuke Shigemi  | DPC | Other                     |
| 523 | Outcomes of women with congenital heart disease admitted to acute-care hospitals for delivery in Japan: a retrospective cohort study using nationwide Japanese diagnosis procedure combination database | 2021 | Manabu Nitta     | DPC | Obstetrics and gynecology |
| 524 | Association between rehabilitation during hospitalization and perinatal outcomes among pregnant women with threatened preterm birth                                                                     | 2021 | Daisuke Shigemi  | DPC | Rehabilitation            |
| 525 | Predictive factors of the 30-day mortality after surgery for spinal metastasis: Analysis of a nationwide database                                                                                       | 2021 | Ryoko Sawada     | DPC | Orthopedics               |
| 526 | Factors affecting in-hospital mortality of diabetic ketoacidosis patients: A retrospective cohort study                                                                                                 | 2021 | Yukihito Sato    | DPC | Internal medicine         |
| 527 | Hospitalization for urinary tract infections in Japan, 2010-2015: a retrospective study using a national inpatient database                                                                             | 2021 | Akahito Sako     | DPC | Internal medicine         |
| 528 | Dose-response association between nurse staffing and patient outcomes following major cancer surgeries using a nationwide inpatient database in Japan                                                   | 2021 | Naoki Hirose     | DPC | Surgery                   |
| 529 | Use of Echocardiography and Heart Failure In-Hospital Mortality from Registry Data in Japan                                                                                                             | 2021 | Kenya Kusunose   | DPC | Internal medicine         |
| 530 | Association of short-term exposure to air pollution with myocardial infarction with and without obstructive coronary artery disease                                                                     | 2021 | Masanobu Ishii   | DPC | Internal medicine         |
| 531 | Trends in the Use of Cardiac Rehabilitation in Japan Between 2010 and 2017 - An Epidemiological Survey                                                                                                  | 2021 | Natsuko Kanazawa | DPC | Rehabilitation            |
| 532 | Burden of kidney disease on the discrepancy between reasons for hospital admission and death: An observational cohort study                                                                             | 2021 | Shintaro Mandai  | DPC | Internal medicine         |
| 533 | In-hospital mortality associated with community-acquired pneumonia due to methicillin-resistant Staphylococcus aureus: a matched-pair cohort study                                                      | 2021 | Yukiyo Sakamoto  | DPC | Internal medicine         |
| 534 | Resource-rich Intensive Care Units vs. Standard Intensive Care Units on Patient Mortality: A Nationwide Inpatient Database Study                                                                        | 2021 | Hiroyuki Ohbe    | DPC | Emergency medicine        |
| 535 | Impact of cancer on short-term in-hospital mortality after primary acute myocardial infarction                                                                                                          | 2021 | Robert Zheng     | DPC | Internal medicine         |



|     |                                                                                                                                                                                                                                        |      |                  |     |                    |
|-----|----------------------------------------------------------------------------------------------------------------------------------------------------------------------------------------------------------------------------------------|------|------------------|-----|--------------------|
| 536 | Perioperative Complications of Laminoplasty in Degenerative Cervical Myelopathy -A Comparative Study Between Ossification of Posterior Longitudinal Ligament and Cervical Spondylotic Myelopathy Using a Nationwide Inpatient Database | 2021 | Shingo Morishita | DPC | Orthopedics        |
| 537 | Comparing Perioperative Mortality and Morbidity of Minimally Invasive Esophagectomy Versus Open Esophagectomy for Esophageal Cancer: A Nationwide Retrospective Analysis                                                               | 2021 | Takashi Sakamoto | DPC | Surgery            |
| 538 | Associations between early parenteral nutrition and in-hospital outcomes in underweight patients with gastrointestinal surgery                                                                                                         | 2021 | Shunichi Otaka   | DPC | Surgery            |
| 539 | Acute Hospital Mortality of Venous Thromboembolism in Patients With Cancer From Registry Data                                                                                                                                          | 2021 | Yuichiro Okushi  | DPC | Surgery            |
| 540 | Association between parenteral nutrition in the early phase and outcomes in patients with abdominal trauma undergoing emergency laparotomy: A retrospective nationwide study                                                           | 2021 | Shunichi Otaka   | DPC | Surgery            |
| 541 | Comparison of Perioperative Complications in Anterior Decompression With Fusion and Posterior Decompression With Fusion for Cervical Spondylotic Myelopathy: Propensity Score Matching Analysis Using a Nationwide Inpatient Database  | 2021 | Shingo Morishita | DPC | Orthopedics        |
| 542 | Potassium Concentration in Initial Fluid Therapy and In-Hospital Mortality of Patients with Diabetic Ketoacidosis                                                                                                                      | 2021 | Akira Okada      | DPC | Internal medicine  |
| 543 | Effect of Daikenchuto for Mechanically Ventilated Patients With Enteral Feeding Intolerance: A Propensity Score-Matched Analysis Using a Nationwide Administrative Inpatient Database                                                  | 2021 | Hiroyuki Ohbe    | DPC | Emergency medicine |
| 544 | Intensive care unit versus high-dependency care unit for mechanically ventilated patients with pneumonia: a nationwide comparative effectiveness study                                                                                 | 2021 | Hiroyuki Ohbe    | DPC | Emergency medicine |
| 545 | Intensive care unit versus high-dependency care unit for patients with acute heart failure: a nationwide propensity score-matched cohort study                                                                                         | 2021 | Hiroyuki Ohbe    | DPC | Emergency medicine |
| 546 | Associations between Early Surgery and Postoperative Outcomes in Elderly Patients with Distal Femur Fracture: A Retrospective Cohort Study                                                                                             | 2021 | Norio Yamamoto   | DPC | Orthopedics        |
| 547 | Effect of Early Rehabilitation Treatment on Activities of Daily Living in Patients Receiving Conservative Treatment for Vertebral Compression Fracture                                                                                 | 2021 | Takaaki Ikeda    | DPC | Rehabilitation     |
| 548 | Trends and safety of robot-assisted partial nephrectomy during the initial 2-year period after government approval in Japan: A nationwide database study from 2016 to 2018                                                             | 2021 | Minato Yokoyama  | DPC | Urology            |
| 549 | Clinical Trajectories of Suicide Attempts and Self-harm in Patients Admitted to Acute-care Hospitals in Japan: A Nationwide Inpatient Database Study                                                                                   | 2021 | Hiroyuki Ohbe    | DPC | Emergency medicine |
| 550 | Prognostic Factors Among Children With Acute Encephalitis/Encephalopathy Associated With Viral and Other Pathogens                                                                                                                     | 2021 | Takeshi Hatachi  | DPC | Pediatrics         |
| 551 | Epidemiology of Chronic Critical Illness in Japan: A Nationwide Inpatient Database Study                                                                                                                                               | 2021 | Hiroyuki Ohbe    | DPC | Emergency medicine |
| 552 | Small-bore feeding tube versus large-bore sump tube for early enteral nutrition in mechanically ventilated patients: A nationwide inpatient database study                                                                             | 2021 | Hiroyuki Ohbe    | DPC | Emergency medicine |
| 553 | Effect of Early Rehabilitation on Physical Function in Patients Undergoing Coronary Artery Bypass Grafting: A Nationwide Inpatient Database Study                                                                                      | 2021 | Hiroyuki Ohbe    | DPC | Rehabilitation     |
| 554 | Identification of risk factors for mortality and delayed oral dietary intake in patients with open drainage due to deep neck infections: Nationwide study using a Japanese inpatient database                                          | 2021 | Hiroshi Hidaka   | DPC | Surgery            |

|     |                                                                                                                                                                                                           |      |                     |     |                           |
|-----|-----------------------------------------------------------------------------------------------------------------------------------------------------------------------------------------------------------|------|---------------------|-----|---------------------------|
| 555 | Impact of Corticosteroid Administration within 7 Days of the Hospitalization for Influenza Pneumonia with Respiratory Failure: A Propensity Score Analysis Using a Nationwide Administrative Database     | 2021 | Daisuke Okuno       | DPC | Internal medicine         |
| 556 | Effects of Polymyxin B Hemoperfusion on Septic Shock Patients Requiring Noradrenaline: Analysis of a Nationwide Administrative Database in Japan                                                          | 2021 | Kenji Fujimori      | DPC | Emergency medicine        |
| 557 | Snowfall reduces the risk of chronic subdural hematoma onset: Analysis of an administrative database in Japan                                                                                             | 2021 | Kazunori Oda        | DPC | Neurosurgery              |
| 558 | Seasonality of mortality and in-hospital complications in hip fracture surgery: Retrospective cohort research using a nationwide inpatient database                                                       | 2021 | Takahisa Ogawa      | DPC | Orthopedics               |
| 559 | Placental abruption in each hypertensive disorders of pregnancy phenotype: a retrospective cohort study using a national inpatient database in Japan                                                      | 2021 | Katsuhiko Naruse    | DPC | Obstetrics and gynecology |
| 560 | Intravenous cyclophosphamide in acute exacerbation of rheumatoid arthritis-related interstitial lung disease: A propensity-matched analysis using a nationwide inpatient database                         | 2021 | Kaito Nakamura      | DPC | Internal medicine         |
| 561 | Outcomes of a financial incentive scheme for dementia care by dementia specialist teams in acute-care hospitals: A difference-in-differences analysis of a nationwide retrospective cohort study in Japan | 2021 | Kojiro Morita       | DPC | Psychiatry                |
| 562 | Comparison of fracture risk between proton pump inhibitors and histamine-2 receptor antagonists in ANCA-associated vasculitis patients: a nested case-control study                                       | 2021 | Shinako Miyano      | DPC | Internal medicine         |
| 563 | Seasonal impact on surgical site infections in hip fracture surgery: Analysis of 330,803 cases using a nationwide inpatient database                                                                      | 2021 | Takahisa Ogawa      | DPC | Orthopedics               |
| 564 | The role of heparin bridging in lung cancer surgery: a nationwide database analysis                                                                                                                       | 2021 | Masataka Mori       | DPC | Surgery                   |
| 565 | Effect of tranexamic acid in patients with colonic diverticular bleeding: A nationwide inpatient database study                                                                                           | 2021 | Yuki Miyamoto       | DPC | Internal medicine         |
| 566 | Difference of preventing effects of G-CSF according to age in patients with malignant lymphoma: A nation-wide analysis in Japan                                                                           | 2021 | Kensuke Matsuda     | DPC | Internal medicine         |
| 567 | Risk factors for early in-hospital death in patients who developed coagulopathy during induction therapy for acute promyelocytic leukemia: a nationwide analysis in Japan                                 | 2021 | Kensuke Matsuda     | DPC | Internal medicine         |
| 568 | Spinal epidural hematoma and abscess after neuraxial anesthesia: a historical cohort study using the Japanese Diagnosis Procedure Combination database                                                    | 2021 | Kanako Makito       | DPC | Anesthesiology            |
| 569 | Factors associated with mortality among patients with necrotizing soft tissue infections: An analysis of 4597 cases using the Diagnosis Procedure Combination Database                                    | 2021 | Hitoshi Suzuki      | DPC | Internal medicine         |
| 570 | Clinical Characteristics and Incidences of Benign and Malignant Insulinoma Using a National Inpatient Database in Japan                                                                                   | 2021 | Kayo Ikeda Kurakawa | DPC | Internal medicine         |
| 571 | The clinical practice of ulcerative colitis in elderly patients: An investigation using a nationwide database in Japan                                                                                    | 2021 | Rintaro Moroi       | DPC | Internal medicine         |
| 572 | Comparison of inflammatory bowel disease relapse after top-down or step-up therapy: a population-based cohort study                                                                                       | 2021 | Masanori Ochi       | DPC | Internal medicine         |
| 573 | Breast cancer surgery in patients with schizophrenia: short-term outcomes from a nationwide cohort                                                                                                        | 2021 | Takaaki Konishi     | DPC | Surgery                   |

|     |                                                                                                                                                                                                                      |      |                     |     |                    |
|-----|----------------------------------------------------------------------------------------------------------------------------------------------------------------------------------------------------------------------|------|---------------------|-----|--------------------|
| 574 | Pediatric Fulminant Myocarditis in Japan: A Retrospective Nationwide Database Study of Hospital Volume, Management Practices, and Mortality                                                                          | 2021 | Shingo Ohki         | DPC | Pediatrics         |
| 575 | Association between the chronic use of gastric acid suppressants and high-risk colorectal polyps                                                                                                                     | 2021 | Yasutoshi Shiratori | DPC | Surgery            |
| 576 | Development and validation of a procedure-based organ failure assessment model for patients in the intensive care unit: an administrative database study                                                             | 2021 | Hiroyuki Ohbe       | DPC | Emergency medicine |
| 577 | Comparisons of postoperative outcomes after breast cancer surgery in patients with and without renal replacement therapy: a matched-pair cohort study using a Japanese nationwide inpatient database                 | 2021 | Takaaki Konishi     | DPC | Surgery            |
| 578 | Intensive care unit occupancy in Japan, 2015-2018: a nationwide inpatient database study                                                                                                                             | 2021 | Hiroyuki Ohbe       | DPC | Emergency medicine |
| 579 | Comparing outcomes of nonoperative treatment for adhesive small bowel obstruction with and without antibiotics                                                                                                       | 2021 | Takaaki Konishi     | DPC | Internal medicine  |
| 580 | Age-dependent influence of premorbid underweight status on mortality in severe burn patients: An administrative database study                                                                                       | 2021 | Mizue Matsuo        | DPC | Emergency medicine |
| 581 | Comparison of short-term surgical outcomes between men and women with breast cancer: a retrospective study using nationwide inpatient data in Japan                                                                  | 2021 | Takaaki Konishi     | DPC | Surgery            |
| 582 | Association between body mass index and localization of breast cancer: results from a nationwide inpatient database in Japan                                                                                         | 2021 | Takaaki Konishi     | DPC | Surgery            |
| 583 | Outcomes of Nonoperative Treatment for Gastroduodenal Ulcer Perforation: a Nationwide Study of 14,918 Inpatients in Japan                                                                                            | 2021 | Takaaki Konishi     | DPC | Internal medicine  |
| 584 | Efficacy of Prophylactic Antibiotics during Extracorporeal Membrane Oxygenation: A Nationwide Cohort Study                                                                                                           | 2021 | Yutaka Kondo        | DPC | Emergency medicine |
| 585 | Analysis of the disease activity of ulcerative colitis with and without concomitant primary sclerosing cholangitis: An investigation using a nationwide database in Japan                                            | 2021 | Kota Yano           | DPC | Internal medicine  |
| 586 | Impact of Body Mass Index on Major Complications, Multiple Complications, In-hospital Mortality, and Failure to Rescue Following Esophagectomy for Esophageal Cancer: A Nationwide Inpatient Database Study in Japan | 2021 | Yuki Hirano         | DPC | Surgery            |
| 587 | Association Between Diabetes and Major Bleeding Complications of Renal Biopsy                                                                                                                                        | 2021 | Sho Hasegawa        | DPC | Internal medicine  |
| 588 | Patient backgrounds and short-term outcomes of complicated appendicitis differ from those of uncomplicated appendicitis                                                                                              | 2021 | Takuya Oba          | DPC | Surgery            |
| 589 | Safety and effectiveness of intracardiac echocardiography in ventricular tachycardia ablation: a nationwide observational study                                                                                      | 2021 | Takeshi Kitamura    | DPC | Internal medicine  |
| 590 | Healthcare utilization associated with adherence to antibiotics for abdominal surgeries in Japan: cross-sectional analysis of administrative database                                                                | 2021 | Shinobu Imai        | DPC | Surgery            |
| 591 | Surgical treatment for infective endocarditis in the ageing society: a nationwide retrospective study in Japan                                                                                                       | 2021 | Hiroyuki Kiriya     | DPC | Surgery            |
| 592 | Type of bone graft and primary diagnosis were associated with nosocomial surgical site infection after high tibial osteotomy: analysis of a national database                                                        | 2021 | Manabu Kawata       | DPC | Orthopedics        |
| 593 | Outcomes of laparoscopic versus open pancreatoduodenectomy: A nationwide retrospective cohort study                                                                                                                  | 2021 | Ryusuke Katsuki     | DPC | Surgery            |

|     |                                                                                                                                                                                          |      |                    |     |                    |
|-----|------------------------------------------------------------------------------------------------------------------------------------------------------------------------------------------|------|--------------------|-----|--------------------|
| 594 | Outcomes of self-expandable metal stent as bridge to surgery versus emergency surgery for left-sided obstructing colon cancer: A retrospective cohort study                              | 2021 | Ryusuke Katsuki    | DPC | Surgery            |
| 595 | Early Initiation of Feeding and In-Hospital Outcomes in Patients Hospitalized for Acute Heart Failure                                                                                    | 2021 | Hidehiro Kaneko    | DPC | Internal medicine  |
| 596 | Impact of hospital volume on clinical outcomes of hospitalized heart failure patients: analysis of a nationwide database including 447,818 patients with heart failure                   | 2021 | Hidehiro Kaneko    | DPC | Internal medicine  |
| 597 | Association between Vitamin D and Heart Failure Mortality in 10,974 Hospitalized Individuals                                                                                             | 2021 | Kenya Kusunose     | DPC | Internal medicine  |
| 598 | Acute-phase initiation of cardiac rehabilitation and clinical outcomes in hospitalized patients for acute heart failure                                                                  | 2021 | Hidehiro Kaneko    | DPC | Rehabilitation     |
| 599 | Epidemiologic study of rhegmatogenous retinal detachment in Japan from the Diagnosis Procedure Combination database over a 2-year period (2014-2015)                                     | 2021 | Kazuma Oku         | DPC | Ophthalmology      |
| 600 | Risk of drug-induced interstitial lung disease in hospitalised patients: a nested case-control study                                                                                     | 2021 | Taisuke Jo         | DPC | Internal medicine  |
| 601 | Pre-transplant Rehabilitation to Decrease the Post-transplant Length of Stay for Hematological Malignancy Patients Undergoing Allo-HSCT                                                  | 2021 | Ryutaro Matsugaki  | DPC | Rehabilitation     |
| 602 | Consultation-liaison psychiatry in Japan: a nationwide retrospective observational study                                                                                                 | 2021 | Daisuke Shinjo     | DPC | Psychiatry         |
| 603 | Reverse J-shaped relationship between body mass index and in-hospital mortality of patients hospitalized for heart failure in Japan                                                      | 2021 | Hidetaka Itoh      | DPC | Internal medicine  |
| 604 | Effect of Early Central Venous Catheterization on Mortality Among Patients with Severe Sepsis: A Nationwide Inpatient Database Study                                                     | 2021 | Shunsuke Edakubo   | DPC | Emergency medicine |
| 605 | In-Hospital Complications After Surgery in Elderly Patients with Asymptomatic or Minor Symptom Meningioma: A Nationwide Registry Study                                                   | 2021 | Fusao Ikawa        | DPC | Neurosurgery       |
| 606 | Clinical features and early post-operative complications of isolated C2 odontoid fractures: a retrospective analysis using a national inpatient database in Japan                        | 2021 | Akira Honda        | DPC | Orthopedics        |
| 607 | Association between early intensive care or coronary care unit admission and post-discharge performance of activities of daily living in patients with acute decompensated heart failure | 2021 | Masato Kanda       | DPC | Emergency medicine |
| 608 | Association between the duration of physical restraint and pulmonary embolism in psychiatric patients: A nested case-control study using a Japanese nationwide database                  | 2021 | Naoki Hirose       | DPC | Psychiatry         |
| 609 | Effectiveness of polymyxin B hemoperfusion for sepsis depends on the baseline SOFA score: a nationwide observational study                                                               | 2021 | Kenji Fujimori     | DPC | Emergency medicine |
| 610 | Association between protein intake and mortality in older patients receiving parenteral nutrition: a retrospective observational study                                                   | 2021 | Hiroyuki Tamiya    | DPC | Internal medicine  |
| 611 | Routine varicella vaccination program and hospitalization for herpes zoster in Japan                                                                                                     | 2021 | Yasutaka Kuniyoshi | DPC | Internal medicine  |
| 612 | Recent trends in vitreoretinal surgery: a nationwide database study in Japan, 2010-2017                                                                                                  | 2021 | Yohei Hashimoto    | DPC | Ophthalmology      |
| 613 | In-hospital mortality among patients with invasive non-group A $\beta$ -hemolytic Streptococcus treated with clindamycin combination therapy: a nationwide cohort study                  | 2021 | Shoichiro Hamada   | DPC | Internal medicine  |
| 614 | Estimation of treatment and prognostic factors of pneumocystis pneumonia in patients with connective tissue diseases                                                                     | 2021 | Yuichi Ishikawa    | DPC | Internal medicine  |

|     |                                                                                                                                                                                                                                        |      |                   |     |                           |
|-----|----------------------------------------------------------------------------------------------------------------------------------------------------------------------------------------------------------------------------------------|------|-------------------|-----|---------------------------|
| 615 | Intra-operative autologous blood donation for cardiovascular surgeries in Japan: A retrospective cohort study                                                                                                                          | 2021 | Takuya Okuno      | DPC | Surgery                   |
| 616 | Dexmedetomidine use and mortality in mechanically ventilated patients with severe burns: A cohort study using a national inpatient database in Japan                                                                                   | 2021 | Yuki Enomoto      | DPC | Emergency medicine        |
| 617 | Body mass index and in-hospital mortality in patients with acute exacerbation of idiopathic pulmonary fibrosis                                                                                                                         | 2021 | Nobuyasu Awano    | DPC | Internal medicine         |
| 618 | Dexmedetomidine and Mortality From Sepsis Requiring Mechanical Ventilation: A Japanese Nationwide Retrospective Cohort Study                                                                                                           | 2021 | Shotaro Aso       | DPC | Emergency medicine        |
| 619 | Age and clinical outcomes after hip fracture surgery: do octogenarian, nonagenarian and centenarian classifications matter?                                                                                                            | 2021 | Takahisa Ogawa    | DPC | Orthopedics               |
| 620 | Early rehabilitation after acute myocardial infarction: A nationwide inpatient database study                                                                                                                                          | 2021 | Kensuke Nakamura  | DPC | Rehabilitation            |
| 621 | Impact of seasonal and meteorological factors on the incidence of adhesive small bowel obstruction: A large-scale study using a national inpatient database                                                                            | 2021 | Yuta Yamamoto     | DPC | Surgery                   |
| 622 | Hospitalization and discharge routes of elderly hip fracture patients with and without dementia: a nationwide cross-sectional exploratory study using the Japanese Diagnostic Procedure Combination database                           | 2022 | Yuko Mine         | DPC | General medicine          |
| 623 | Epidemiological Study of Hospital Admissions for Food-Induced Anaphylaxis Using the Japanese Diagnosis Procedure Combination Database                                                                                                  | 2022 | Keiji Muramatsu   | DPC | Internal medicine         |
| 624 | Ambient temperature and hospital admissions for acute cholecystitis: a nationwide inpatient database study in Japan                                                                                                                    | 2022 | Teppei Miyakawa   | DPC | Surgery                   |
| 625 | New machine learning scoring system for predicting postoperative mortality in gastroduodenal ulcer perforation: A study using a Japanese nationwide inpatient database                                                                 | 2022 | Takaaki Konishi   | DPC | Surgery                   |
| 626 | Effect of antithrombin III among patients with disseminated intravascular coagulation in obstetrics: a nationwide observational study in Japan                                                                                         | 2022 | Yudai Iwasaki     | DPC | Obstetrics and gynecology |
| 627 | Postoperative ICU admission following major elective surgery: A nationwide inpatient database study                                                                                                                                    | 2022 | Hiroyuki Ohbe     | DPC | Surgery                   |
| 628 | Association between adjunct clindamycin and in-hospital mortality in patients with necrotizing soft tissue infection due to group A Streptococcus: a nationwide cohort study                                                           | 2022 | Shoichiro Hamada  | DPC | Internal medicine         |
| 629 | Validity of a model using routinely collected data for identifying infections following gastric, colon, and liver cancer surgeries                                                                                                     | 2022 | Hayato Yamana     | DPC | Surgery                   |
| 630 | Association of body mass index with Clostridioides difficile infection among older patients with pneumonia in Japan                                                                                                                    | 2022 | Risa Suzuki       | DPC | General medicine          |
| 631 | Risk factors for in-hospital mortality in patients with advanced lung cancer with interstitial pneumonia undergoing systemic chemotherapy: A retrospective and observational study using a nationwide administrative database in Japan | 2022 | Tomoko Shiraiishi | DPC | Internal medicine         |
| 632 | Comparison of Direct Oral Anticoagulants for Acute Hospital Mortality in Venous Thromboembolism                                                                                                                                        | 2022 | Yuichiro Okushi   | DPC | Internal medicine         |
| 633 | Effectiveness of surgical fixation for rib fractures in relation to its timing: a retrospective Japanese nationwide study                                                                                                              | 2022 | Shunichi Otaka    | DPC | Surgery                   |

|     |                                                                                                                                                                                       |      |                     |     |                    |
|-----|---------------------------------------------------------------------------------------------------------------------------------------------------------------------------------------|------|---------------------|-----|--------------------|
| 634 | Use of naldemedine is associated with reduced incidence of hyperactive delirium in cancer patients with opioid-induced constipation: A nationwide retrospective cohort study in Japan | 2022 | Hiroaki Abe         | DPC | General medicine   |
| 635 | Impact of body mass index on short-term outcomes after differentiated thyroid cancer surgery: a nationwide inpatient database study in Japan                                          | 2022 | Takaaki Konishi     | DPC | Surgery            |
| 636 | Short-Term Outcomes Following Breast Cancer Surgery With and Without Neoadjuvant Chemotherapy: A Nationwide Administrative Database Study in Japan                                    | 2022 | Takaaki Konishi     | DPC | Surgery            |
| 637 | Additional effect of azithromycin over $\beta$ -lactam alone for severe community-acquired pneumonia-associated acute respiratory distress syndrome: a retrospective cohort study     | 2022 | Jun Suzuki          | DPC | Emergency medicine |
| 638 | ICU Versus High-Dependency Care Unit for Patients With Acute Myocardial Infarction: A Nationwide Propensity Score-Matched Cohort Study                                                | 2022 | Hiroyuki Ohbe       | DPC | Emergency medicine |
| 639 | Recent trends in glaucoma surgery: a nationwide database study in Japan, 2011-2019                                                                                                    | 2022 | Asahi Fujita        | DPC | Ophthalmology      |
| 640 | A new scoring system for predicting in-hospital death after lung cancer surgery (the SABCIP score) using a Japanese nationwide administrative database                                | 2022 | Masahiro Tahara     | DPC | Surgery            |
| 641 | Predictive ability of the sequential organ failure assessment score for in-hospital mortality in patients with cardiac critical illnesses: a nationwide observational study           | 2022 | Yuji Nishimoto      | DPC | Emergency medicine |
| 642 | Current clinical practice of subcutaneous implantable cardioverter-defibrillator: Analysis using the JROAD-DPC database                                                               | 2022 | Reina Tonegawa-Kuji | DPC | Internal medicine  |
| 643 | Effectiveness of early rehabilitation following aortic surgery: a nationwide inpatient database study                                                                                 | 2022 | Kensuke Nakamura    | DPC | Rehabilitation     |
| 644 | Outcomes of gastrointestinal cancer surgeries in Parkinson's disease patients: A nationwide study                                                                                     | 2022 | Satoshi Kodama      | DPC | Psychiatry         |
| 645 | Interstitial lung disorders following postoperative radiotherapy with concurrent or sequential hormonal therapy for breast cancer: a nationwide database study in Japan               | 2022 | Takaaki Konishi     | DPC | Surgery            |
| 646 | Predictive Factors for Oral Intake Recovery After Acute Stroke: Analysis of a Japanese Nationwide Inpatient Database                                                                  | 2022 | Yasuhiro Inooka     | DPC | Neurosurgery       |
| 647 | Validity of identification algorithms combining diagnostic codes with other measures for acute ischemic stroke in MID-NET®                                                            | 2022 | Masatoshi Tanigawa  | DPC | Neurosurgery       |
| 648 | Incidence and outcomes of in-hospital cardiac arrest in Japan 2011-2017: a nationwide inpatient database study                                                                        | 2022 | Hiroyuki Ohbe       | DPC | Emergency medicine |
| 649 | Epidemiologic evaluation of pleurisy diagnosed by surgical pleural biopsy using data from a nationwide administrative database                                                        | 2022 | Kanako Hara         | DPC | Surgery            |
| 650 | Low- versus high-concentration intravenous immunoglobulin for children with Kawasaki disease in the acute phase                                                                       | 2022 | Takanori Suzuki     | DPC | Pediatrics         |
| 651 | Volume-Outcome Relationships for Percutaneous Coronary Intervention in Acute Myocardial Infarction                                                                                    | 2022 | Yuichi Saito        | DPC | Internal medicine  |
| 652 | Recombinant human soluble thrombomodulin for acute exacerbation of idiopathic pulmonary fibrosis: a nationwide observational study                                                    | 2022 | Nobuyasu Awano      | DPC | Internal medicine  |
| 653 | Association Between Systemic Corticosteroid Use and Mortality in Patients with Epiglottitis                                                                                           | 2022 | Yuya Kimura         | DPC | Otolaryngology     |
| 654 | Short-Term Prognostic Factors in Hospitalized Herpes Zoster Patients and Its Associated Cerebro-Cardiovascular Events: A Nationwide Retrospective Cohort in Japan                     | 2022 | Yuichi Ishikawa     | DPC | Dermatology        |

|     |                                                                                                                                                                                                                                                              |      |                   |     |                    |
|-----|--------------------------------------------------------------------------------------------------------------------------------------------------------------------------------------------------------------------------------------------------------------|------|-------------------|-----|--------------------|
| 655 | Association between subcutaneous steroid injection for extravasation of vesicant anticancer drugs and skin ulcers requiring surgery                                                                                                                          | 2022 | Keiko Ohisa       | DPC | Internal medicine  |
| 656 | Direct oral anticoagulants versus warfarin for secondary prevention of cerebral infarction and bleeding in older adults with atrial fibrillation                                                                                                             | 2022 | Ryosuke Kumazawa  | DPC | Neurosurgery       |
| 657 | Evaluation of cholecystectomy in older individuals using real-world data: a multilevel analysis based on a nationwide administrative database in Japan                                                                                                       | 2022 | Yasuhisa Mori     | DPC | Surgery            |
| 658 | Implant removal following open reduction and internal fixation for distal radius fracture: A study based on the Diagnosis Procedure Combination database in Japan                                                                                            | 2022 | Shunsuke Miyaoka  | DPC | Orthopedics        |
| 659 | Effectiveness of colonic stent placement for obstructive colorectal cancers: An analysis of short-term results using a nationwide database in Japan                                                                                                          | 2022 | Rintaro Moroi     | DPC | Surgery            |
| 660 | Urban-Rural Inequalities in Care and Outcomes of Severe Traumatic Brain Injury: A Nationwide Inpatient Database Analysis in Japan                                                                                                                            | 2022 | Keita Shibahashi  | DPC | Neurosurgery       |
| 661 | Resuscitative endovascular balloon occlusion of the aorta for life-threatening postpartum hemorrhage: A nationwide observational study in Japan                                                                                                              | 2022 | Kyosuke Kamijo    | DPC | Radiology          |
| 662 | Comparison of Clinical Outcomes and Safety Between Open and Laparoscopic Surgery for Adhesive Small Bowel Obstruction: A Propensity-Matched Analysis of a National Inpatient Database                                                                        | 2022 | Yuta Yamamoto     | DPC | Surgery            |
| 663 | Acute-Phase Initiation of Cardiac Rehabilitation for Short-Term Improvement in Activities of Daily Living in Patients Hospitalized for Acute Heart Failure                                                                                                   | 2022 | Kensuke Ueno      | DPC | Rehabilitation     |
| 664 | Comparison of perioperative complications in anterior decompression with fusion and posterior decompression with fusion for thoracic ossification of the posterior longitudinal ligament -a retrospective cohort study using a nationwide inpatient database | 2022 | Shingo Morishita  | DPC | Orthopedics        |
| 665 | Association of ambient temperature and sun exposure with hip fractures in Japan: A time-series analysis using nationwide inpatient database                                                                                                                  | 2022 | Hisaaki Nishimura | DPC | Orthopedics        |
| 666 | Treatments and outcomes of generalized pustular psoriasis: A cohort of 1516 patients in a nationwide inpatient database in Japan                                                                                                                             | 2022 | Hideaki Miyachi   | DPC | Dermatology        |
| 667 | Comparison of postoperative infection after emergency inguinal hernia surgery with enterectomy between mesh repair and non-mesh repair: a national database analysis                                                                                         | 2022 | Takashi Sakamoto  | DPC | Surgery            |
| 668 | Effect of Branched-Chain Amino Acid Infusion on In-Hospital Mortality of Patients With Hepatic Encephalopathy and End-Stage Kidney Disease: A Retrospective Cohort Study Using a National Inpatient Database                                                 | 2022 | Akira Okada       | DPC | Internal medicine  |
| 669 | Risk factors for severe lower extremity ischemia following venoarterial extracorporeal membrane oxygenation: an analysis using a nationwide inpatient database                                                                                               | 2022 | Akira Honda       | DPC | Emergency medicine |
| 670 | Glucocorticoids and Rates of Biphasic Reactions in Patients with Adrenaline-Treated Anaphylaxis: A Propensity Score Matching Analysis                                                                                                                        | 2022 | Shimpei Nagata    | DPC | Emergency medicine |
| 671 | Annual Trend in Lumbar Puncture for Infants Younger Than 3 Months Hospitalized With Suspected Serious Bacterial Infection: A Nationwide Inpatient Database Study                                                                                             | 2022 | Yasuyuki Fuseda   | DPC | Pediatrics         |
| 672 | Clinical Features of Kawasaki Disease With Atlantoaxial Rotatory Fixation                                                                                                                                                                                    | 2022 | Nobuaki Michihata | DPC | Pediatrics         |
| 673 | Validity of operative information in Japanese administrative data: a chart review-based analysis of 1221 cases at a single institution                                                                                                                       | 2022 | Takaaki Konishi   | DPC | Other              |

|     |                                                                                                                                                                                                                                                             |      |                    |     |                           |
|-----|-------------------------------------------------------------------------------------------------------------------------------------------------------------------------------------------------------------------------------------------------------------|------|--------------------|-----|---------------------------|
| 674 | Gabapentinoid Use Is Associated With Reduced Occurrence of Hyperactive Delirium in Older Cancer Patients Undergoing Chemotherapy: A Nationwide Retrospective Cohort Study in Japan                                                                          | 2022 | Hiroaki Abe        | DPC | Internal medicine         |
| 675 | Acute Pancreatitis in Japan: Comparison of Before and After Revision of the Clinical Guidelines                                                                                                                                                             | 2022 | Mio Ikeda          | DPC | Surgery                   |
| 676 | Influence of inpatient rehabilitation after crisis in patients with myasthenia gravis: A retrospective cohort study using a nationwide administrative database in Japan                                                                                     | 2022 | Hiromichi Otaka    | DPC | Rehabilitation            |
| 677 | Quantification of Internal Medicine Resident Inpatient Care Using the Diagnosis Procedure Combination Database                                                                                                                                              | 2022 | Takahiro Tsutsumi  | DPC | Internal medicine         |
| 678 | Association Between Intensive Care Unit Admission Practices and Outcomes in Patients with Isolated Traumatic Subarachnoid Hemorrhage: A Nationwide Inpatient Database Analysis in Japan                                                                     | 2022 | Keita Shibahashi   | DPC | Neurosurgery              |
| 679 | Association between psoriasis and short-term outcomes of acute myocardial infarction: A matched-pair cohort study using a nationwide inpatient database in Japan                                                                                            | 2022 | Hideaki Miyachi    | DPC | Internal medicine         |
| 680 | Association between early diagnosis of and inpatient mortality from invasive pulmonary aspergillosis among patients without immunocompromised host factors: a nationwide observational study                                                                | 2022 | Katsuhiko Inoue    | DPC | Internal medicine         |
| 681 | Prognostic factors for the successful conservative management of nonocclusive mesenteric ischemia                                                                                                                                                           | 2022 | Yoko Toda          | DPC | Surgery                   |
| 682 | Postoperative outcomes of cancer surgery in patients with and without kidney failure with dialysis therapy: a matched-pair cohort study                                                                                                                     | 2022 | Yoshihisa Miyamoto | DPC | Surgery                   |
| 683 | Fractures within 2 years of an obstetric hospitalization: analysis of nationwide administrative data in Japan                                                                                                                                               | 2022 | Mikayo Toba        | DPC | Obstetrics and gynecology |
| 684 | Early electroconvulsive therapy in patients with bipolar depression: A propensity score-matched analysis using a nationwide inpatient database                                                                                                              | 2022 | Ryuichi Yamazaki   | DPC | Psychiatry                |
| 685 | Perioperative Complications of Anterior Decompression with Fusion in Degenerative Cervical Myelopathy—A Comparative Study between Ossification of Posterior Longitudinal Ligament and Cervical Spondylotic Myelopathy Using a Nationwide Inpatient Database | 2022 | Shingo Morishita   | DPC | Orthopedics               |
| 686 | Cost-effectiveness analysis of trastuzumab monotherapy versus adjuvant chemotherapy plus trastuzumab in elderly patients with HER2-positive early breast cancer                                                                                             | 2022 | Takaaki Konishi    | DPC | Surgery                   |
| 687 | Temporal trends in clinical characteristics and in-hospital mortality among patients with COVID-19 in Japan for waves 1, 2, and 3: A retrospective cohort study                                                                                             | 2022 | Hideki Endo        | DPC | Emergency medicine        |
| 688 | Association between comprehensive geriatric assessment and polypharmacy at discharge in patients with ischaemic stroke: A nationwide, retrospective, cohort study                                                                                           | 2022 | Tatsuya Hosoi      | DPC | General medicine          |
| 689 | Comparison of liposomal amphotericin B alone and in combination with flucytosine in the treatment of non-HIV Cryptococcal meningitis: A nationwide observational study                                                                                      | 2022 | Takahiro Takazono  | DPC | Internal medicine         |
| 690 | Laparoscopic versus open distal pancreatectomy with or without splenectomy: A propensity score analysis in Japan                                                                                                                                            | 2022 | Takaaki Konishi    | DPC | Surgery                   |
| 691 | Preoperative arterial embolization and wound complications after resection of malignant bone tumor in the pelvis: a nationwide database study                                                                                                               | 2022 | Liuzhe Zhang       | DPC | Orthopedics               |
| 692 | Hospitalizations for Ambulatory Care Sensitive Conditions in a Large City of Japan: a Descriptive Analysis Using Claims Data                                                                                                                                | 2022 | Arisa Iba          | DPC | General medicine          |
| 693 | Impact of Prophylactic Corticosteroid Use on In-hospital Mortality and Respiratory Failure after Esophagectomy for Esophageal Cancer: Nationwide Inpatient Data Study in Japan                                                                              | 2022 | Yuki Hirano        | DPC | Surgery                   |



|     |                                                                                                                                                                                                                        |      |                     |     |                   |
|-----|------------------------------------------------------------------------------------------------------------------------------------------------------------------------------------------------------------------------|------|---------------------|-----|-------------------|
| 694 | Comparison of short-term outcomes between pedicled- and free-flap autologous breast reconstruction: a nationwide inpatient database study in Japan                                                                     | 2022 | Ryo Karakawa        | DPC | Plastic surgery   |
| 695 | Association between heat exposure and hospitalization for diabetic ketoacidosis, hyperosmolar hyperglycemic state, and hypoglycemia in Japan                                                                           | 2022 | Keitaro Miyamura    | DPC | Internal medicine |
| 696 | Postoperative cerebral infarction risk is related to lobectomy site in lung cancer: a retrospective cohort study of nationwide data in Japan                                                                           | 2022 | Natsumasa Nishizawa | DPC | Surgery           |
| 697 | Oral Management by a Full-Time Resident Dentist in the Hospital Ward Reduces the Incidence of Pneumonia in Patients with Acute Stroke                                                                                  | 2022 | Kenichiro Ozaki     | DPC | Other             |
| 698 | Comparison of short-term clinical outcomes between low-dose prasugrel and clopidogrel as part of triple antithrombotic therapy in patients requiring oral anticoagulant therapy and percutaneous coronary intervention | 2022 | Hideki Kitahara     | DPC | Internal medicine |
| 699 | Hospitalizations for Cardiovascular Diseases During the Early Stage of the COVID-19 Pandemic in Japan                                                                                                                  | 2022 | Tadafumi Sugimoto   | DPC | Internal medicine |

---

DPC, the Diagnosis Procedure Combination database

## Appendix 1

**Search terms for NDB and NDB Open Data studies:** (((claims and NDB) OR (National Database of Health Insurance Claims) OR (National Database of Health Insurance Claim) OR (National Database of Japanese Health Insurance Claims) OR (nationwide administrative claims database)) AND (Japan OR Japanese)) AND (2013:2022[pdat]) NOT (Korea) NOT (Taiwan)

**Search terms for JMDC database studies:** (("JMDC") OR ("jmdc database") OR ("Japan Medical Data Center")) AND (Japan OR Japanese)

**Search terms for DPC database studies:** (("Diagnosis Procedure Combination database"[Title/Abstract]) OR ("nationwide database"[Title/Abstract]) OR ("administrative database"[Title/Abstract]) OR ("inpatient database"[Title/Abstract]) OR ("discharge database"[Title/Abstract])) AND (Japan OR Japanese)
